# Supplementary material for: Copper(i)-catalyzed click chemistry in deep eutectic solvent for the syntheses of β-d-glucopyranosyltriazoles
Source: Royal Society of Chemistry journal article supplement (doi:10.1039/d3ra01844j), 2023-01-01
Supplement: d3ra01844j1.pdf [file d3ra01844j1.pdf]

# Supporting Information

## Copper(I)-Catalyzed Click Chemistry in Deep Eutectic Solvent for the Syntheses of $\beta$ -D-Glucopyranosyltriazoles

Subrat Sethi,<sup>1</sup> Narayan Ch. Jana,<sup>1</sup> Surajit Panda,<sup>1</sup> Suraj Kumar Maharana<sup>1</sup> and Bidraha Bagh \*<sup>1</sup>

<sup>1</sup>School of Chemical Sciences, National Institute of Science Education and Research (NISER), An OCC of Homi Bhabha National Institute, Bhubaneswar, Jatni, Khurda, Odisha, PIN 752050, India.

\*Corresponding author, E-mail: [bidraha@niser.ac.in](mailto:bidraha@niser.ac.in)

Number of pages: 55

Number of figures: 59

Number of tables: 7

## Table of Contents

---

|                                                                                       |     |
|---------------------------------------------------------------------------------------|-----|
| General experimental                                                                  | S3  |
| Synthesis of ligand <b>L</b> <sub>1</sub> and copper(I) complex <b>1</b>              | S4  |
| Characteristic spectra of ligand <b>L</b> <sub>1</sub> and copper(I) complex <b>1</b> | S6  |
| General experiments of CuAAC reactions in DESs                                        | S9  |
| NMR data of the products                                                              | S13 |
| NMR spectra of the products                                                           | S21 |
| Molecular structure determination by single crystal X-ray crystallography             | S45 |
| Zero Pass of optimized reaction condition by the CHEM21 green metrics toolkit         | S49 |
| First Pass of optimized reaction condition by the CHEM21 green metrics toolkit        | S50 |
| References                                                                            | S55 |

---

## General experimental

The catalytic reactions were performed under nitrogen atmosphere. Chemicals were purchased from Sigma-Aldrich, TCI, Alfa-aesar, Himedia chemicals and used without further purification. Solvents, purchased from commercial suppliers were dried prior to synthesis of copper complexes. Copper catalysed azide alkyne cycloaddition reaction (CuAAC) were performed under inert condition while deep eutectic solvents were prepared inside the globe box. Deuterated solvents DMSO-d<sub>6</sub> and CDCl<sub>3</sub> were purchased from Sigma-Aldrich and used without further purification for recording NMR spectra. <sup>1</sup>H and <sup>13</sup>C NMR spectra were recorded at Bruker AV-400 and 700 spectrometers (<sup>1</sup>H at 400 MHz and <sup>13</sup>C at 101 MHz). <sup>1</sup>H NMR chemical shifts are referenced in parts per million (ppm) with respect to tetramethyl silane (δ 0.00 ppm) and <sup>13</sup>C{<sup>1</sup>H} NMR chemical shifts are referenced in ppm with respect to DMSO-d<sub>6</sub> (δ 39.52 ppm) and CDCl<sub>3</sub> (δ 77.16 ppm). The coupling constants (*J*) are reported in hertz (Hz). The following abbreviations are used to describe multiplicity: bs = broad signal, s = singlet, d = doublet, t = triplet, q = quadrate, m = multiplate. High resolution mass spectra were recorded on a Bruker micrOTOF-Q II Spectrometer. Elemental analysis was carried out on a EuroEA Elemental Analyser. Crystal data were collected with Rigaku Oxford diffractometer and with INCOATEC micro source (Mo-Kα radiation, λ = 0.71073 Å, multilayer optics) at 100 K.

## Synthesis of ligand L<sub>1</sub> and copper(I) complex 1

**Synthesis of ligand L<sub>1</sub>:**<sup>[S1]</sup> Compound 3-(2-methoxyphenyl)-1H-pyrazole is a known compound and was synthesized using following procedure. A solution of 2-Methoxy acetophenone (1.50 g, 10.0 mmol) in a 1:1 mixture of DMF-DMA (15 mL) was reflux for 3 days under inert condition to give an orange brown solution. Removal of solvents under vacuum gave a brown oil. Thereafter, ethanol (20 mL) and hydrazine hydrate (1.28 g, 40.0 mmol) were added and the reaction mixture was refluxed for 2 hours. The resulting yellow solution was cooled to room temperature and cold water (15 mL) was added giving an off-white precipitate. The mixture was kept at 0-4 °C overnight to allow complete precipitation and the solid was collected after filtration. The solid was washed with cold water (3 x 20 mL) to give a white solid as pure product (1.67 g, 96%). <sup>1</sup>H NMR (CDCl<sub>3</sub>): δ 12.50 (br, 1H), 7.73 (m, 1H), 7.69 (s, 1H), 7.09 (m, 2H), 6.67 (s, 1H), 4.02 (s, 3H).

In a pressure tube, 3-(2-methoxyphenyl)-1H-pyrazole (1.74 g, 10.0 mmol), 2-(chloromethyl) pyridine hydrochloride (1.64 g, 10.0 mmol), NaOH solution (40%, 5 mL) and toluene (15 mL) were added and the reaction mixture was stirred at r.t. for 15 mins. Then tert-butylammonium hydroxide (4 mL) was added and the reaction mixture was stirred at 130 °C temperature for 24 h. The resulting red mixture was cooled down to r.t. and extracted with ethyl acetate (3 x 50 mL). All volatiles were removed under high vacuum to give 2-((3-(2-methoxyphenyl)-1H-pyrazol-1-yl) methyl) pyridine as pure product (2.27 g, 73%).<sup>[S1]</sup> <sup>1</sup>H NMR (400 MHz, CDCl<sub>3</sub>) δ 8.59 (s, 1H), 7.98 (dd, *J* = 7.7, 1H), 7.62–7.64 (m, *J* = 7.7, 1H), 7.56 (d, *J* = 2.3 Hz, 1H), 7.28–7.30 (m, *J* = 8.2, 1.7 Hz, 1H), 7.20 (dd, *J* = 7.0, Hz, 1H), 7.08–6.96 (m, 3H), 6.87 (d, *J* = 2.3 Hz, 1H), 5.53 (s, 2H), 3.91 (s, 3H). <sup>13</sup>C NMR (101 MHz, CDCl<sub>3</sub>) δ 157.13, 156.87, 149.34, 149.01, 137.20, 130.53, 128.87, 122.76, 122.45, 121.83, 120.91, 111.39, 107.79, 57.73, 55.57. HRMS (ESI-TOF) *m/z*: [M + H]<sup>+</sup> calcd for C<sub>16</sub>H<sub>16</sub>N<sub>3</sub>O 266.1293; found 266.1285. Anal. Calcd

for  $C_{16}H_{15}N_3O$  (265.12): C, 72.43; H, 5.70; N, 15.84. Found: C, 72.25; H, 5.56; N, 15.68. FTIR  $\nu_{\max}$  ( $cm^{-1}$ ): 2800–3100 (C–H), 1505 (N–N), 1410–1600 (C=N, py; C=C, ph).

### Synthesis of copper (I) complex **1**

The ligand (0.066 g, 0.25 mmol) was dissolved in 5 mL  $CH_3CN$  in a Schlenk tube inside the glovebox.  $CuI$  (0.047 g, 0.25 mmol) suspension in acetonitrile was then added to the ligand solution with continuous stirring. The reaction mixture turned into whitish color solution and the stirring was continued for 24 hours. The reaction mixture was then dried in high vacuum and the NMR of the crude solid was recorded in  $DMSO-d_6$ . The crude solid was then dissolved in DMF and taken into a 5 mL vial. The crystallization was carried out by diffusing with diethyl ether. Block shape white crystals suitable for X-ray crystallography were grown at the bottom of the vial after two days. Yield: (0.093 g, 82%).  $^1H$  NMR (700 MHz,  $DMSO$ )  $\delta$  8.51 (s, 1H), 8.03 (s, 1H), 7.95 (t,  $J = 7.5$  Hz, 1H), 7.84 (d,  $J = 6.5$  Hz, 1H), 7.57 (s, 1H), 7.44 (s, 1H), 7.30 (t,  $J = 7.3$  Hz, 1H), 7.03 (d,  $J = 8.3$  Hz, 1H), 6.88 (t,  $J = 7.3$  Hz, 1H), 6.69 (s, 1H), 5.55 (s, 2H), 3.75 (s, 3H).  $^{13}C$  NMR (101 MHz,  $DMSO$ )  $\delta$  156.47, 154.19, 149.78, 148.38, 138.51, 132.36, 129.62, 129.51, 124.14, 123.97, 120.89, 120.14, 111.49, 107.21, 55.42, 54.92. Anal. Calcd. for  $C_{32}H_{30}Cu_2I_2N_6O_2$  (911.50): C, 47.17; H, 3.32; N, 9.22; Found: C, 47.03; H, 3.37; N, 9.10. HRMS (ESI-TOF)  $m/z$ :  $[M]^+$  calcd for  $C_{16}H_{15}CuN_3O$  328.0511; found 328.0517. FTIR  $\nu_{\max}$  ( $cm^{-1}$ ): 2740–3130 (C–H), 1515 (N–N), 1400–1640 (C=N, py; C=C, ph).

## Characteristic spectra of ligand L<sub>1</sub> and copper(I) complex 1

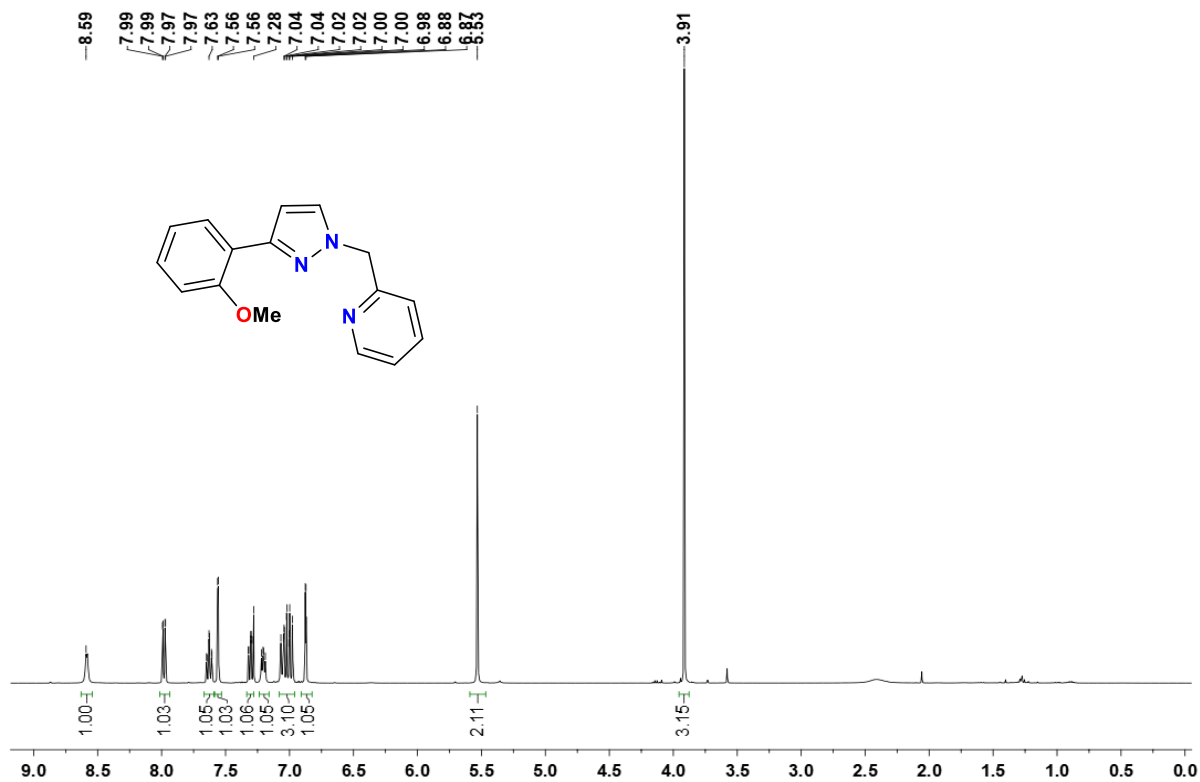

**Figure S1.** <sup>1</sup>H NMR of 2-((3-(2-methoxyphenyl)-1H-pyrazol-1-yl) methyl)pyridine (L<sub>1</sub>) in CDCl<sub>3</sub> at r.t.

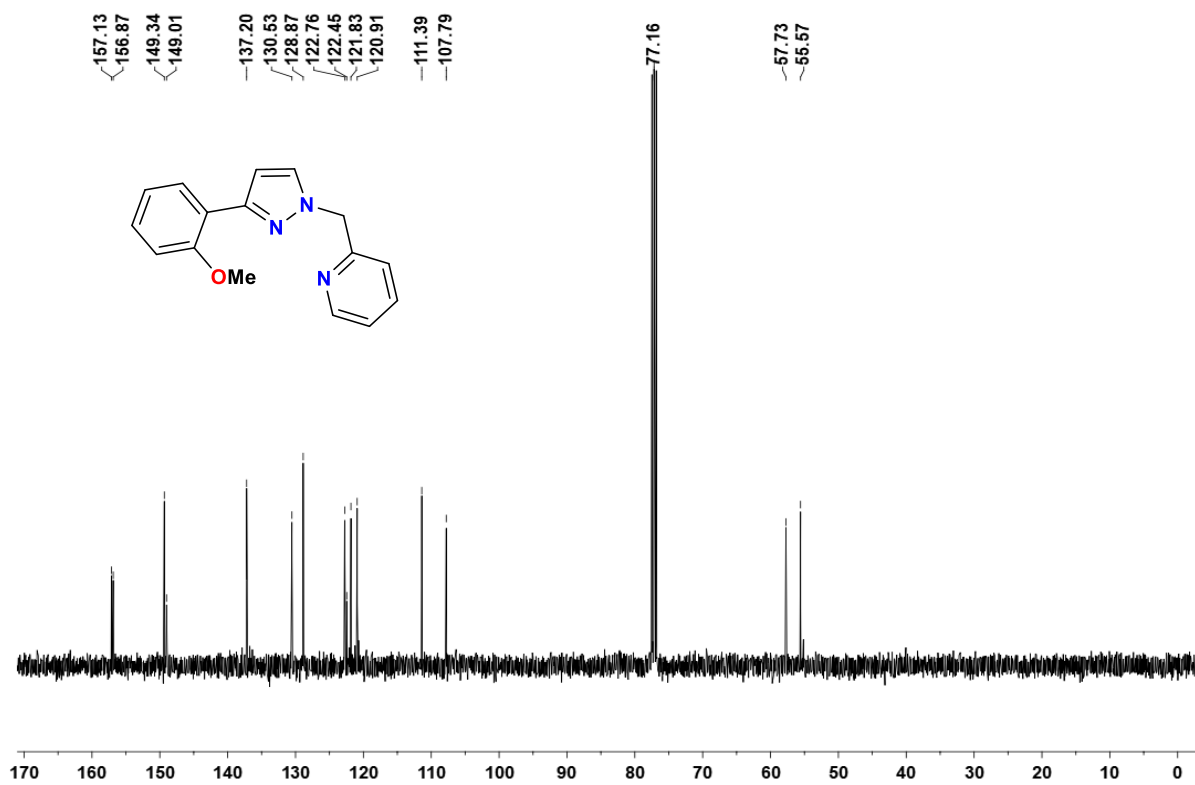

**Figure S2.** <sup>13</sup>C NMR of 2-((3-(2-methoxyphenyl)-1H-pyrazol-1-yl) methyl)pyridine (L<sub>1</sub>) in CDCl<sub>3</sub> at r.t.

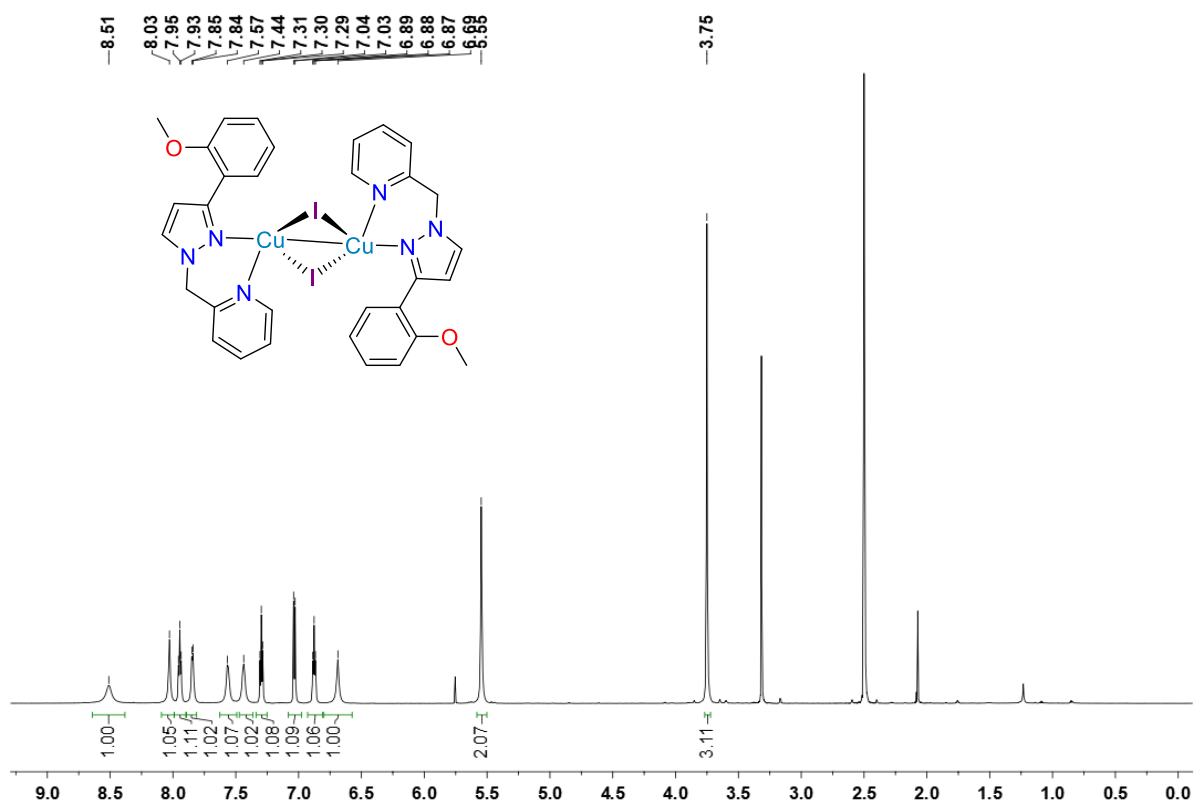

**Figure S3:  $^1\text{H}$  NMR of complex 1 in  $\text{DMSO-d}_6$ .**

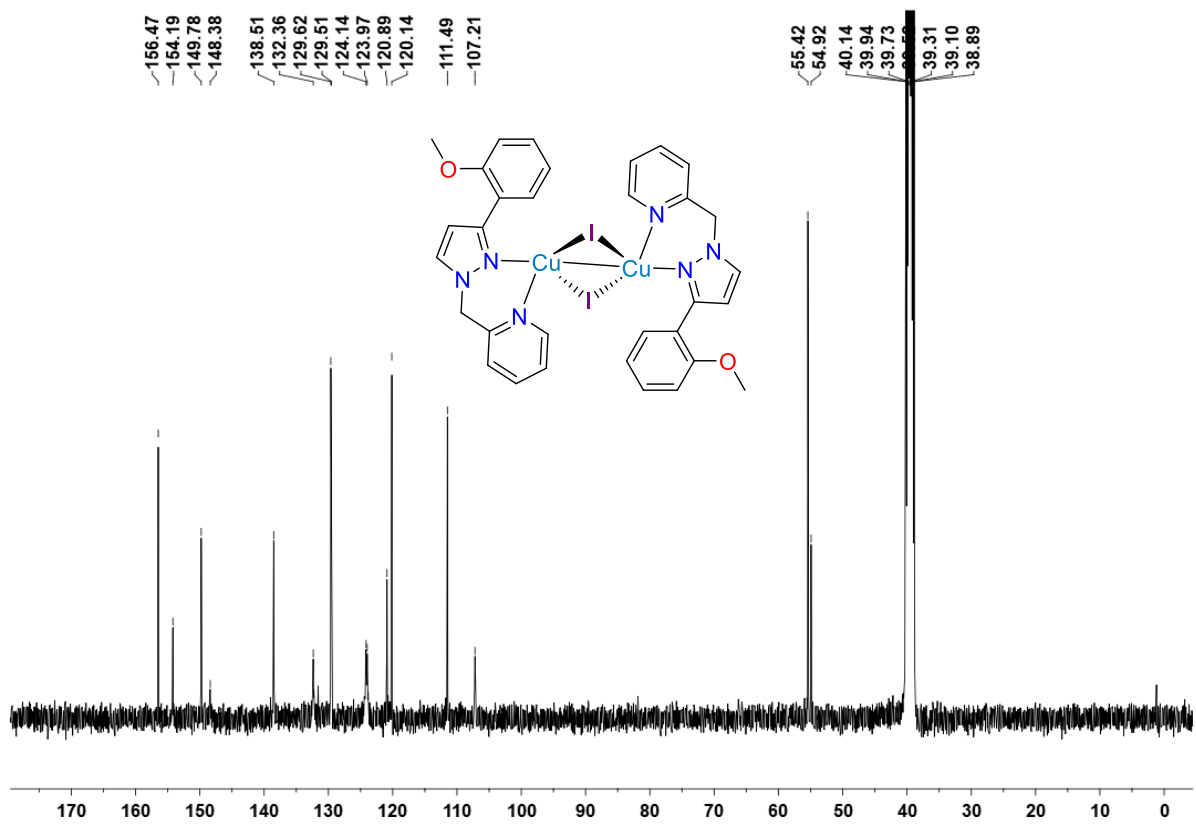

**Figure S4:  $^{13}\text{C}$  NMR of complex 1 in  $\text{DMSO-d}_6$ .**

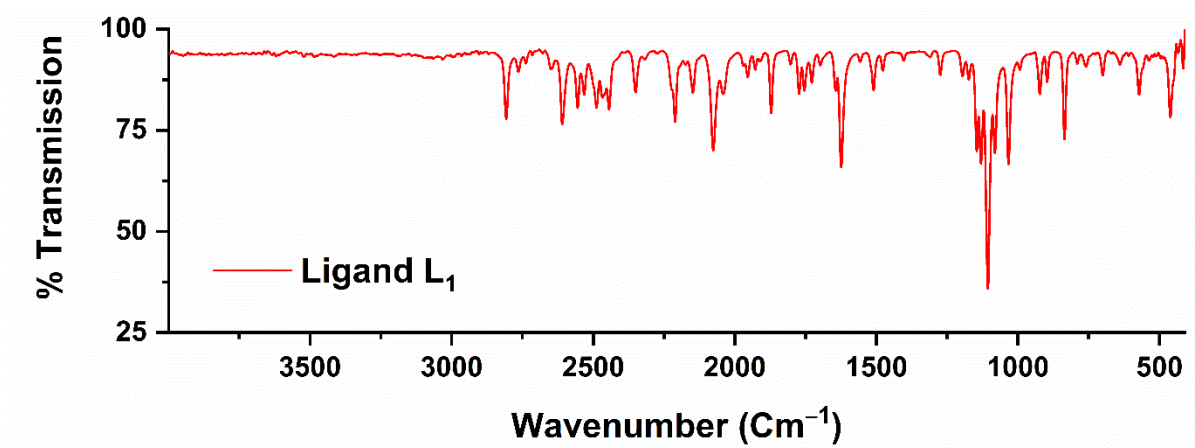

Figure S5: FTIR Spectrum of ligand L<sub>1</sub>.

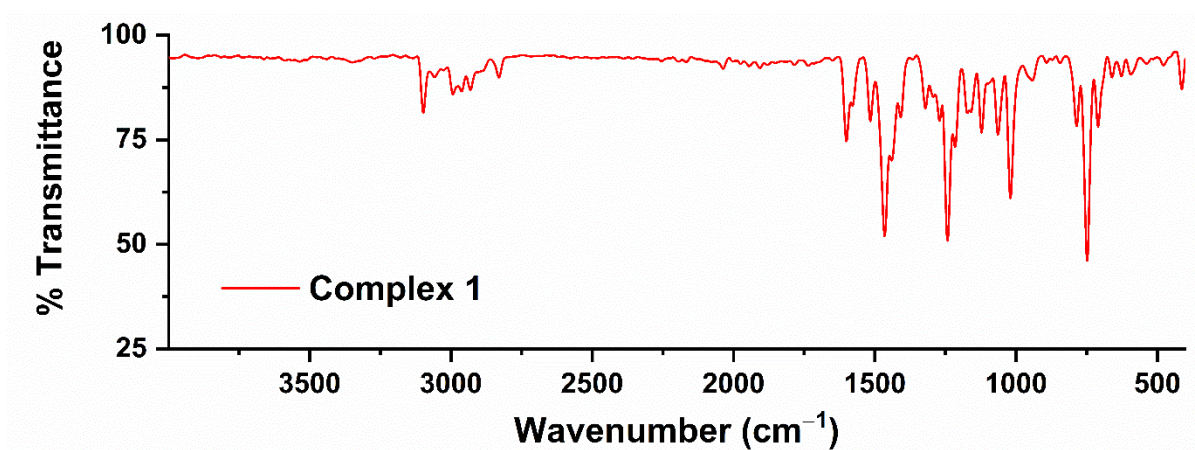

Figure S6: FTIR Spectrum of complex 1.



## General experiments of CuAAC reactions in DESs

### General procedure for CuAAC reactions (for reaction optimisation).

All the CuAAC reactions were performed under inert condition. 1-Bromo- $\alpha$ -D-glucose tetraacetate, 2,3,4,6-Tetra-O-acetyl- $\alpha$ -D-glucopyranosyl bromide (0.102 g, 0.25 mmol), phenyl acetylene (0.025 g, 0.25 mmol), NaN<sub>3</sub> (0.040 g, 0.625 mmol), and 1.5 mol% copper complex **1** (3 mol% [Cu]), were weighed in a vial (10 mL). Thereafter, different deep eutectic solvent for different experiments was added to it. The resultant mixture was heated at appropriate temperature (r.t./ 70 °C) for an appropriate time with stirring. Formation of solid crude was observed after the desired reaction time. The crude solid product was then filtered and washed with additional 2 mL of 25 % ammonia solution to remove copper from the triazole products. The compound was then dried under vacuum and white crude solid compound was isolated as pure form. The product was dissolved in CDCl<sub>3</sub> and <sup>1</sup>H NMR spectrum was recorded. The anomeric configuration of the triazole was compared with literature reported compound and the NMR data/spectra of our products are identical with the reported  $\beta$ -isomer of glucopyranosyltriazoles.<sup>[S2]</sup> The NMR signature of the corresponding  $\alpha$ -D-Glucopyranosyltriazole is different.<sup>[S3]</sup>

### General procedure for gram-scale CuAAC reactions:

The optimised reaction conditions in TBAB/glycerol (Method **A**; 1.5 mol% of catalyst loading, ChCl/glycerol (1:2), 70 °C, 12 h) or in ChCl/glycerol (Method **B**; 1.5 mol% of catalyst loading, ChCl/glycerol (1:2), 70 °C, 12 h) was selected for gram-scale (10 mmol) CuAAC reactions as reaction medium. For this purpose, acetobromo- $\alpha$ -D-glucose (4.112 g, 10 mmol), phenyl acetylene (1.021 g, 10 mmol), NaN<sub>3</sub> (1.625 g, 25 mmol), and copper complex **1** (1.5 mol%), were added in 40 mL of TBAB/glycerol (1:4) or ChCl/glycerol (1:2). After the desired reaction time the crude solid product was filtered and washed with additional 20 mL of 25 % ammonia solution. The compound was then dried under vacuum and white crude solid compound was isolated as pure form. The product was then dissolved in CDCl<sub>3</sub> and <sup>1</sup>H NMR spectrum was recorded.

### General procedure for substrate scope:

Both the optimised reaction conditions (Method **A**; 1.5 mol% of catalyst loading, TBAB/glycerol (1:4), 70 °C, 12 h; Method **B**; 1.5 mol% of catalyst loading, ChCl/glycerol (1:2), 70 °C, 12 h) were utilized for the synthesis of various  $\beta$ -D-glucopyranosyltriazoles. In this regard, four different glucopyran-derivatives (0.25 mmol), and alkynes (0.25 mmol) were combined with sodium azide (0.62 mmol) and copper complex **1** (1.5 mol %) in a vial (10 mL).

It is important to mention that, we did not use sodium azide when the starting glycosides had an azide functionality i.e. the substrates scope with 2-azidoethyl 2,3,4,6-tetra-O-acetyl- $\beta$ -D-glucopyranoside. Thereafter, DESs ChCl/glycerol or TBAB/glycerol (1:4) (2 mL) was added to it. The reaction mixture was placed under optimized reaction conditions. After that, the reaction mixture was diluted with water followed by filtered and washed with 25 % ammonia solution to get desire  $\beta$ -D-glucopyranosyltriazoles product. The compound was then dried under vacuum and crude solid compound was isolated as pure form. Occasionally the crude product was purified by column chromatography using silica as stationary phase and ethyl acetate-hexane mixture (1:9) as eluent. The product was then dissolved in  $\text{CDCl}_3$  and NMR ( $^1\text{H}$  and  $^{13}\text{C}$ ) spectrum was recorded. Most of the products glucopyranosyltriazoles ( $\beta$ -isomer) are reported compounds and the NMR data/spectra of our products are identical with the reported compounds.<sup>[S2]</sup> The NMR signature of the corresponding  $\alpha$ -D-Glucopyranosyltriazole is different.<sup>[S3]</sup>

**General procedure for the recycling of the reaction medium and calculation of *E*-factor:**

The reaction medium was recycled as follows: For this purpose, 2 mmol reaction scale was conducted with, acetobromo- $\alpha$ -D-glucose (0.822 g, 2 mmol), phenyl acetylene (0.204 g, 2 mmol),  $\text{NaN}_3$  (0.325 g, 5 mmol), and 1.5 mol% copper complex **1** (3 mol% [Cu]), using 4 mL (4.788 g) of TBAB/glycerol (1:4) or ChCl/glycerol (1:4) as reaction medium. The solid product was filtered with a Büchner funnel, washed with 25 % ammonia solution (2 mL) by portion and dried under vacuum. Thereafter, the volume of the aqueous phase was reduced to 4 mL and placed in the reaction vial equipped with a magnetic stirring bar. Acetobromo- $\alpha$ -D-glucose (0.102 g, 0.25 mmol), phenyl acetylene (0.025 g, 0.25mmol),  $\text{NaN}_3$  (0.016 g, 0.25 mmol), and 1.5 mol% copper complex **1** (3 mol% [Cu]) were added and the reaction was stirred for 12 h at 70 °C. Here it is worth to mention that only 1 eqv. amount of sodium azide is used instead of 2.5 eqv. as we assumed that recovered reaction media already contain 1.5 eqv sodium azide. The entire process was repeated four times. Thus, the reaction medium was recycled five times and no change in catalytic activity was observed. The amount of media recovered in both the methods is as follows: **Method A**: 1<sup>st</sup> run: 4.726 g; 2<sup>nd</sup> cycle: 4.672 g; 3<sup>rd</sup> cycle: 4.545 g; 4<sup>th</sup> cycle: 4.320 g; 5<sup>th</sup> cycle: 4.150 g; **Method B**: 1<sup>st</sup> run: 4.776 g; 2<sup>nd</sup> cycle: 4.650 g; 3<sup>rd</sup> cycle: 4.625 g; 4<sup>th</sup> cycle: 4.598 g; 5<sup>th</sup> cycle: 4.550 g.

The triazole product **A** was obtained in excellent isolated yield in all reaction runs: **Method A**: (1<sup>st</sup> run: 931 mg; 2<sup>nd</sup> cycle: 921 mg; 3<sup>rd</sup> cycle: 921 mg; 4<sup>th</sup> cycle: 931 mg; 5<sup>th</sup> cycle: 921 mg);

**Method B:** (1<sup>st</sup> run: 893 mg; 2<sup>nd</sup> cycle: 903 mg; 3<sup>rd</sup> cycle: 892 mg; 4<sup>th</sup> cycle: 897 mg; 5<sup>th</sup> cycle: 905 mg).

**Overall E-factor for five consecutive reaction runs in Method A and Method B**

**Method A:** 1.5 mol% of catalyst loading, 70 °C, 12 h in TBAB/glycerol (1:4)

|            |                                                              |           |  |
|------------|--------------------------------------------------------------|-----------|--|
| Substrate: | acetobromo- $\alpha$ -D-glucose (2 mmol)                     | = 0.822 g |  |
|            | Phenyl acetylene (2 mmol)                                    | = 0.204 g |  |
|            | Sodium azide (5 mmol)                                        | = 0.325 g |  |
| Catalyst:  | Cu(I) iodide complex <b>1</b> (1.5 mol %)                    | = 0.013 g |  |
| Solvent:   | TBAB/glycerol (4 mL) x 1.1817                                | = 4.726 g |  |
|            | 25 % ammonia solution, 2 mL (used to wash the product) x 0.9 | = 1.8 g   |  |

$$E\text{-factor} = \frac{\text{mass (waste)}}{\text{mass (product)}}$$

$$= \frac{0.195 \text{ g (sodium azide)} + 0.065 \text{ g (copper catalyst)} + 4.726 \text{ g (reaction medium)} + 9 \text{ g (ammonia solution used to wash the product)}}{0.931 \text{ g} + 0.921 \text{ g} + 0.921 \text{ g} + 0.931 \text{ g} + 0.921 \text{ g (product)}}$$

$$= 13.986 \text{ g} / 4.625 \text{ g}$$

$$= \mathbf{3.02 \text{ kg waste} / 1 \text{ kg of product}}$$

**Method B:** 1.5 mol% of catalyst loading, 70 °C, 12 h in ChCl/glycerol (1:2),

|            |                                                              |           |  |
|------------|--------------------------------------------------------------|-----------|--|
| Substrate: | acetobromo- $\alpha$ -D-glucose (2 mmol)                     | = 0.822 g |  |
|            | Phenyl acetylene (2 mmol)                                    | = 0.204 g |  |
|            | Sodium azide (5 mmol)                                        | = 0.325 g |  |
| Catalyst:  | Cu(I) iodide complex <b>1</b> (1.5 mol %)                    | = 0.013 g |  |
| Solvent:   | ChCl/glycerol (4 mL) x 1.194                                 | = 4.776 g |  |
|            | 25 % ammonia solution, 2 mL (used to wash the product) x 0.9 | = 1.8 g   |  |

$$E\text{-factor} = \frac{\text{mass (waste)}}{\text{mass (product)}}$$

$$= \frac{0.195 \text{ g (sodium azide)} + 0.065 \text{ g (copper catalyst)} + 4.776 \text{ g (reaction medium)} + 9 \text{ g (ammonia solution used to wash the product)}}{0.893 \text{ g} + 0.903 \text{ g} + 0.892 \text{ g} + 0.897 \text{ g} + 0.905 \text{ g (product)}}$$

$$= 14.036 \text{ g} / 4.49 \text{ g}$$

$$= \mathbf{3.12 \text{ kg waste} / 1 \text{ kg of product}}$$

**E-factor for a single reaction run in in Method A and Method B:** Assuming that the reaction medium can be infinitely recycled.

**Method A:** 1.5 mol% of catalyst loading, 70 °C, 12 h in TBAB/glycerol (1:4)

$$\begin{aligned}
 E\text{-factor} &= \frac{\text{mass (waste)}}{\text{mass (product)}} \\
 &= \frac{0.195 \text{ g (sodium azide)} + 0.013 \text{ g (copper catalyst)} + 0.054 \text{ (solvent TBAB/glycerol)} + 1.8 \text{ g (ammonia solution used to wash the product)}}{0.931 \text{ g (product)}} \\
 &= 2.062 \text{ g} / 0.931 \text{ g} \\
 &= \mathbf{2.21 \text{ kg waste} / 1 \text{ kg of product}}
 \end{aligned}$$

**Method B:** 1.5 mol% of catalyst loading, 70 °C, 12 h in ChCl/glycerol (1:2),

$$\begin{aligned}
 E\text{-factor} &= \frac{\text{mass (waste)}}{\text{mass (product)}} \\
 &= \frac{0.195 \text{ g (sodium azide)} + 0.013 \text{ g (copper catalyst)} + 0.126 \text{ (solvent ChCl/glycerol)} + 1.8 \text{ g (ammonia solution used to wash the product)}}{0.893 \text{ g (product)}} \\
 &= 2.134 \text{ g} / 0.893 \text{ g} \\
 &= \mathbf{2.38 \text{ kg waste} / 1 \text{ kg of product}}
 \end{aligned}$$

**Synthesis and isolation of acetoazido- $\beta$ -D-glucose from acetobromo- $\alpha$ -D-glucose followed by the reaction with phenyl acetylene to form  $\beta$ -D-Glucopyranosyltriazole:**

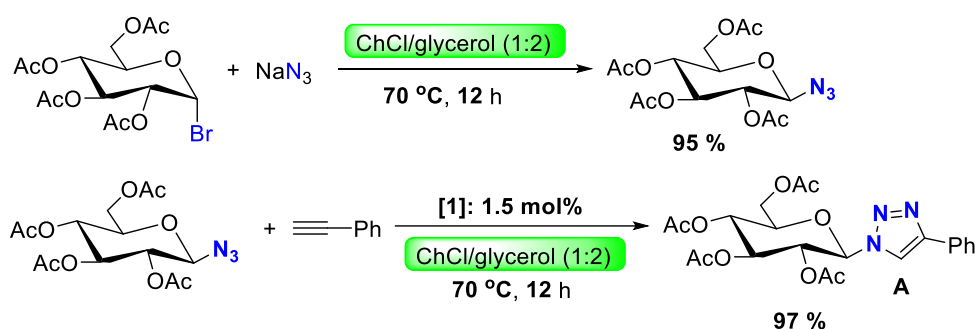

In the first step, acetobromo- $\alpha$ -D-glucose (0.206 g, 0.5 mmol) and  $\text{NaN}_3$  (0.040 g, 1.25 mmol) were weighed in a vial (10 mL). Thereafter,  $\text{ChCl/Glycerol (1:2)}$  or  $\text{TBAB/glycerol (1:4)}$  was added into the vial. The resultant mixture was heated at  $70\text{ }^\circ\text{C}$  for 12 h with stirring. Formation of solid crude was observed after the desired reaction time. The crude solid product was then filtered and washed with additional 2 mL of water. The crude was then dried under vacuum and white solid compound was isolated as pure form. The product (2R,3R,4S,5R,6R)-2-(acetoxymethyl)-6-azidotetrahydro-2H-pyran-3,4,5-triyl triacetate was dissolved in  $\text{CDCl}_3$  and

<sup>1</sup>H NMR spectrum was recorded. Yield: 176 mg, 95%). <sup>1</sup>H NMR (700 MHz, CDCl<sub>3</sub>) δ 5.21 (t, *J* = 9.5 Hz, 1H), 5.09 (t, *J* = 9.8 Hz, 1H), 4.94 (t, *J* = 9.2 Hz, 1H), 4.64 (d, *J* = 8.9 Hz, 1H), 4.26 (dd, *J* = 12.5, 4.8 Hz, 1H), 4.16 (dd, *J* = 12.4, 2.0 Hz, 1H), 3.79 (ddd, *J* = 10.0, 4.7, 2.2 Hz, 1H), 2.09 (s, 3H), 2.07 (s, 3H), 2.02 (s, 3H), 2.00 (s, 3H). <sup>13</sup>C NMR (101 MHz, CDCl<sub>3</sub>) δ 170.73, 170.24, 169.43, 169.33, 88.04, 74.15, 72.73, 70.77, 68.01, 61.78, 20.81, 20.66.

In the following step, 0.25 mmol of acetoazido-β-D-glucose is treated with 0.25 mmol of phenyl acetylene in presence of catalyst **1** (1.5 mol %) in ChCl/Glycerol or TBAB/glycerol for 12 h and the resultant mixture was heated at 70 °C with stirring. Formation of solid crude was observed after the desired reaction time. The crude solid product was then filtered and washed with additional 2 mL of 25 % ammonia solution. The compound was then dried under vacuum and white crude solid compound was isolated as pure form. The product was dissolved in CDCl<sub>3</sub> and <sup>1</sup>H NMR spectrum was recorded.

## NMR data of the products:

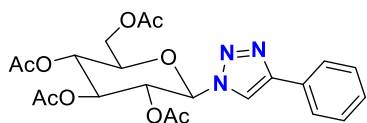

**(2R,3R,4S,5R,6R)-2-(acetoxymethyl)-6-(4-phenyl-1H-1,2,3-triazol-1-yl)tetrahydro-2H-pyran-3,4,5-triyl triacetate (A):** Isolated as white solid (46.5 mg, 98%).  $^1\text{H}$  NMR (400 MHz,  $\text{CDCl}_3$ )  $\delta$  8.00 (s, 1H), 7.86 – 7.80 (m, 2H), 7.43 (t,  $J = 7.5$  Hz, 2H), 7.36 (d,  $J = 7.4$  Hz, 1H), 5.93 (d,  $J = 9.3$  Hz, 1H), 5.52 (t,  $J = 9.4$  Hz, 1H), 5.44 (t,  $J = 9.4$  Hz, 1H), 5.27 (t,  $J = 9.7$  Hz, 1H), 4.33 (dd,  $J = 12.6, 5.1$  Hz, 1H), 4.16 (dd,  $J = 12.6, 2.0$  Hz, 1H), 4.03 (ddd,  $J = 10.1, 5.0, 2.1$  Hz, 1H), 2.08 (d,  $J = 3.9$  Hz, 6H), 2.04 (s, 3H), 1.88 (s, 3H).  $^{13}\text{C}$  NMR (101 MHz,  $\text{CDCl}_3$ )  $\delta$  170.65, 170.07, 169.53, 169.16, 148.65, 130.01, 129.02, 128.72, 126.05, 117.86, 85.94, 75.31, 72.87, 70.33, 67.88, 61.72, 20.82, 20.68, 20.66, 20.32.

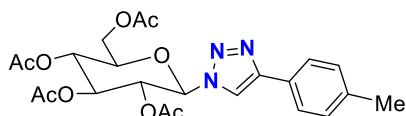

**(2R,3R,4S,5R,6R)-2-(acetoxymethyl)-6-(4-(p-tolyl)-1H-1,2,3-triazol-1-yl)tetrahydro-2H-pyran-3,4,5-triyl triacetate (B<sub>1</sub>):** Isolated as off white solid (47 mg, 96%).  $^1\text{H}$  NMR (700 MHz,  $\text{CDCl}_3$ )  $\delta$  7.96 (d,  $J = 2.8$  Hz, 1H), 7.77 – 7.67 (m, 2H), 7.24 (d,  $J = 4.5$  Hz, 2H), 5.93 (dd,  $J = 9.3, 2.8$  Hz, 1H), 5.52 (td,  $J = 9.4, 2.8$  Hz, 1H), 5.44 (dd,  $J = 9.3, 2.8$  Hz, 1H), 5.27 (dd,  $J = 9.7, 2.7$  Hz, 1H), 4.40 – 4.24 (m, 1H), 4.16 (d,  $J = 12.6$  Hz, 1H), 4.03 (d,  $J = 4.8$  Hz, 1H), 2.38 (d,  $J = 2.4$  Hz, 3H), 2.08 (dd,  $J = 6.4, 3.0$  Hz, 6H), 2.03 (d,  $J = 2.8$  Hz, 3H), 1.88 (d,  $J = 2.8$  Hz, 3H).  $^{13}\text{C}$  NMR (176 MHz,  $\text{CDCl}_3$ )  $\delta$  170.66, 170.07, 169.53, 169.15, 148.72, 138.63, 129.68, 127.18, 125.95, 117.47, 85.90, 75.27, 72.91, 70.30, 67.88, 61.72, 21.43, 20.82, 20.67, 20.66, 20.31.

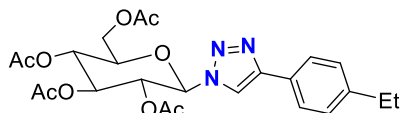

**(2R,3R,4S,5R,6R)-2-(acetoxymethyl)-6-(4-(4-ethylphenyl)-1H-1,2,3-triazol-1-yl)tetrahydro-2H-pyran-3,4,5-triyl triacetate (B<sub>2</sub>):** Isolated as white solid (49 mg, 97%).  $^1\text{H}$  NMR (400 MHz,  $\text{CDCl}_3$ )  $\delta$  7.96 (s, 1H), 7.76 (s, 1H), 7.74 (s, 1H), 7.27 (s, 1H), 7.25 (s, 1H), 5.93 (d,  $J = 9.3$  Hz, 1H), 5.52 (t,  $J = 9.4$  Hz, 1H), 5.44 (t,  $J = 9.4$  Hz, 1H), 5.31 – 5.22 (m, 1H), 4.40 – 4.25 (m, 1H), 4.16 (dd,  $J = 12.6, 2.1$  Hz, 1H), 4.03 (ddd,  $J = 10.1, 5.0, 2.1$  Hz, 1H), 2.68 (q,  $J = 7.6$  Hz, 2H), 2.09 (s, 3H), 2.07 (s, 3H), 2.03 (s, 3H), 1.87 (s, 3H), 1.25 (t,  $J = 7.6$  Hz, 3H).  $^{13}\text{C}$  NMR (101 MHz,  $\text{CDCl}_3$ )  $\delta$  170.66, 170.07, 169.53, 169.13, 148.74, 145.02, 128.51, 127.43, 126.05, 117.47 (s), 85.92, 75.29, 72.91, 70.31, 67.90, 61.73, 28.82, 20.83, 20.68, 20.65, 20.31, 15.64.

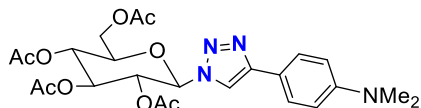

**(2R,3R,4S,5R,6R)-2-(acetoxymethyl)-6-(4-(4-(dimethylamino)phenyl)-1H-1,2,3-triazol-1-yl)tetrahydro-2H-pyran-3,4,5-triyl triacetate (B<sub>3</sub>):** Isolated as white solid (50 mg, 97%).  $^1\text{H}$  NMR (400 MHz,  $\text{CDCl}_3$ )  $\delta$  7.84 (s, 1H), 7.72 – 7.67 (m, 2H), 6.78 – 6.74 (m, 1H), 5.91 (d,  $J = 9.4$  Hz), 5.53 (t,  $J = 9.5$  Hz, 2H), 5.42 (t,  $J = 9.4$  Hz, 1H), 5.32 – 5.19 (m, 1H), 4.32 (dd,  $J = 12.6, 5.1$  Hz, 1H), 4.15 (dd,  $J = 12.6, 2.1$  Hz, 1H), 4.01 (ddd,  $J = 10.1, 5.0, 2.1$  Hz, 1H), 2.99 (s, 3H), 2.08 (s, 3H), 2.07 (s, 3H), 2.03 (s, 3H), 1.87 (s, 3H).  $^{13}\text{C}$  NMR (101 MHz,  $\text{CDCl}_3$ )  $\delta$  170.67, 170.09, 169.53, 169.13, 150.80, 149.16, 127.00, 118.11, 116.11, 112.53, 85.85, 75.22, 73.03, 70.25, 67.93, 61.76, 40.56, 20.83, 20.68, 20.67, 20.33.

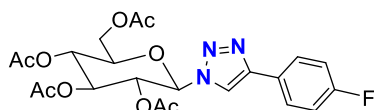

**(2R,3R,4S,5R,6R)-2-(acetoxymethyl)-6-(4-(4-fluorophenyl)-1H-1,2,3-triazol-1-yl)tetrahydro-2H-pyran-3,4,5-triyl triacetate (B<sub>4</sub>):** Isolated as white solid (46.8 mg, 95%). <sup>1</sup>H NMR (400 MHz, CDCl<sub>3</sub>) δ 8.01 (s, 1H), 7.71 (d, *J* = 8.4 Hz, 2H), 7.56 (d, *J* = 8.4 Hz, 2H), 5.93 (d, *J* = 9.0 Hz, 1H), 5.47 (dt, *J* = 24.7, 9.5 Hz, 2H), 5.26 (t, *J* = 9.6 Hz, 1H), 4.33 (dd, *J* = 12.7, 5.0 Hz, 1H), 4.15 (d, *J* = 12.6 Hz, 1H), 4.03 (dd, *J* = 10.1, 3.2 Hz, 1H), 2.08 (d, *J* = 3.4 Hz, 6H), 2.04 (s, 3H), 1.89 (s, 3H). <sup>13</sup>C NMR (101 MHz, CDCl<sub>3</sub>) δ 170.65, 170.06, 169.53, 169.20, 147.61, 132.18, 128.93, 127.55, 122.68, 118.01, 85.95, 77.48, 77.16, 76.84, 75.32, 72.75, 70.31, 67.78, 61.67, 20.83, 20.68, 20.66, 20.33.

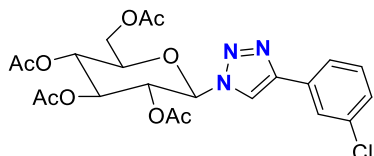

**(2R,3R,4S,5R,6R)-2-(acetoxymethyl)-6-(4-(3-chlorophenyl)-1H-1,2,3-triazol-1-yl)tetrahydro-2H-pyran-3,4,5-triyl triacetate (B<sub>5</sub>):** Isolated as white solid (47.8 mg, 94%). <sup>1</sup>H NMR (400 MHz, CDCl<sub>3</sub>) δ 8.03 (s, 1H), 7.83 (t, *J* = 1.6 Hz, 1H), 7.70 (dt, *J* = 7.4, 1.5 Hz, 1H), 7.32 (ddd, *J* = 11.0, 8.4, 4.9 Hz, 2H), 5.93 (d, *J* = 9.0 Hz, 1H), 5.47 (dt, *J* = 18.5, 9.5 Hz, 2H), 5.33 – 5.19 (m, 1H), 4.32 (dd, *J* = 12.7, 5.0 Hz, 1H), 4.15 (dd, *J* = 12.6, 2.0 Hz, 1H), 4.04 (ddd, *J* = 10.1, 5.0, 2.1 Hz, 1H), 2.07 (d, *J* = 3.6 Hz, 6H), 2.03 (s, 3H), 1.88 (s, 3H). <sup>13</sup>C NMR (101 MHz, CDCl<sub>3</sub>) δ 170.60, 170.01, 169.49, 169.13, 147.30, 134.96, 131.75, 130.28, 128.66, 126.07, 124.08, 118.39, 85.95, 75.30, 72.73, 70.38, 67.81, 61.66, 20.78, 20.64, 20.61, 20.27.

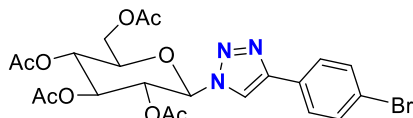

**(2R,3R,4S,5R,6R)-2-(acetoxymethyl)-6-(4-(4-bromophenyl)-1H-1,2,3-triazol-1-yl)tetrahydro-2H-pyran-3,4,5-triyl triacetate (B<sub>6</sub>):** Isolated as white solid (51.43 mg, 93%). <sup>1</sup>H NMR (400 MHz, CDCl<sub>3</sub>) δ 8.01 (s, 1H), 7.71 (d, *J* = 8.4 Hz, 2H), 7.56 (d, *J* = 8.4 Hz, 2H), 5.93 (d, *J* = 9.0 Hz, 1H), 5.47 (dt, *J* = 25.0, 9.5 Hz, 2H), 5.26 (t, *J* = 9.6 Hz, 1H), 4.33 (dd, *J* = 12.7, 5.0 Hz, 1H), 4.15 (d, *J* = 12.6 Hz, 1H), 4.03 (dd, *J* = 10.1, 3.3 Hz, 1H), 2.08 (d, *J* = 3.7 Hz, 6H), 2.04 (s, 3H), 1.89 (s, 3H). <sup>13</sup>C NMR (101 MHz, CDCl<sub>3</sub>) δ 170.65, 170.06, 169.54, 169.20, 132.19, 128.97, 127.54, 122.69, 86.02, 75.34, 72.75, 70.31, 67.78, 61.67, 20.85, 20.70, 20.67, 20.35.

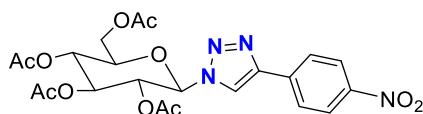

**(2R,3R,4S,5R,6R)-2-(acetoxymethyl)-6-(4-(4-nitrophenyl)-1H-1,2,3-triazol-1-yl)tetrahydro-2H-pyran-3,4,5-triyl triacetate (B<sub>7</sub>):** Isolated as yellow solid (46.8 mg, 90%). <sup>1</sup>H NMR (700 MHz, CDCl<sub>3</sub>) δ 8.31 (d, *J* = 8.5 Hz, 2H), 8.16 (s, 1H), 8.02 (d, *J* = 8.5 Hz, 2H), 5.95 (d, *J* = 8.8 Hz, 1H), 5.48 (dq, *J* = 18.6, 9.5 Hz, 2H), 5.27 (t, *J* = 9.5 Hz, 1H), 4.35 (dd, *J* = 12.7, 5.0 Hz, 1H), 4.17 (d, *J* = 12.7 Hz, 1H), 4.05 (dd, *J* = 10.1, 4.9 Hz, 1H), 2.09 (d, *J* = 5.1 Hz, 6H), 2.05 (s, 3H), 1.90 (s, 3H). <sup>13</sup>C NMR (101 MHz, CDCl<sub>3</sub>) δ 170.60, 170.01, 169.52, 169.25, 147.80, 146.48, 136.23, 126.60, 124.48, 119.54, 86.13, 75.53, 72.64, 70.49, 67.81, 61.67, 20.83, 20.68, 20.66, 20.33.

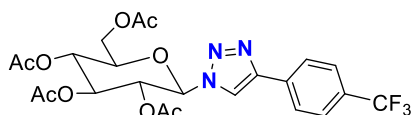

**(2R,3R,4S,5R,6R)-2-(acetoxymethyl)-6-(4-(4-(trifluoromethyl)phenyl)-1H-1,2,3-triazol-1-yl)tetrahydro-2H-pyran-3,4,5-triyl triacetate (B<sub>8</sub>):** Isolated as off white solid (50 mg, 92%). <sup>1</sup>H NMR (400 MHz, CDCl<sub>3</sub>) δ 8.10 (s, 1H), 7.96 (d, *J* = 8.1 Hz, 2H), 7.69 (d, *J* = 8.2 Hz, 2H), 5.95 (d, *J* = 9.0 Hz, 1H), 5.48 (dt, *J* = 18.4, 9.5 Hz, 2H), 5.32 – 5.22 (m, 1H), 4.34 (dd, *J* = 12.7, 5.1 Hz, 1H), 4.16 (dd, *J* = 12.6, 2.0 Hz, 1H), 4.05 (ddd, *J* = 10.1, 5.0, 2.0 Hz, 1H), 2.09 (s, 3H), 2.08 (s, 3H), 2.04 (s, 3H), 1.89 (s, 3H). <sup>13</sup>C NMR (101 MHz, CDCl<sub>3</sub>) δ 170.64, 170.04, 169.54, 169.22, 147.26, 133.44, 130.75, 130.42, 126.22, 126.06, 126.02, 125.50, 122.80, 118.80, 86.03, 75.42, 72.73, 70.42, 67.83, 61.69, 20.82, 20.67, 20.64, 20.31.

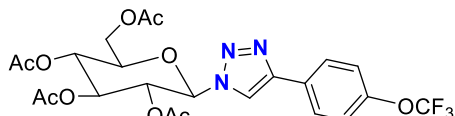

**(2R,3R,4S,5R,6R)-2-(acetoxymethyl)-6-(4-(4-(trifluoromethoxy)phenyl)-1H-1,2,3-triazol-1-yl)tetrahydro-2H-pyran-3,4,5-triyl triacetate (B<sub>9</sub>):** Isolated as white solid (52.55 mg, 94%). <sup>1</sup>H NMR (700 MHz, CDCl<sub>3</sub>) δ 8.01 (s, 1H), 7.86 (d, *J* = 8.4 Hz, 2H), 7.28 (d, *J* = 8.2 Hz, 2H), 5.93 (d, *J* = 9.3 Hz, 1H), 5.50 (t, *J* = 9.4 Hz, 1H), 5.45 (t, *J* = 9.4 Hz, 1H), 5.27 (t, *J* = 9.7 Hz, 1H), 4.33 (dd, *J* = 12.7, 4.9 Hz, 1H), 4.16 (d, *J* = 12.5 Hz, 1H), 4.04 (dd, *J* = 9.5, 4.0 Hz, 1H), 2.08 (d, *J* = 5.6 Hz, 6H), 2.04 (s, 3H), 1.89 (s, 3H). <sup>13</sup>C NMR (101 MHz, CDCl<sub>3</sub>) δ 170.68, 170.08, 169.56, 169.22, 149.36, 147.37, 128.74, 127.46, 121.55, 118.10, 85.97, 75.33, 72.71, 70.31, 67.77, 61.66, 20.85, 20.70, 20.67, 20.33. HRMS (ESI-TOF) *m/z*: [M + H]<sup>+</sup> calcd for C<sub>23</sub>H<sub>25</sub>F<sub>3</sub>N<sub>3</sub>O<sub>10</sub> 560.1492; Found 560.1494.

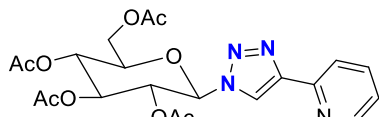

**(2R,3R,4S,5R,6R)-2-(acetoxymethyl)-6-(4-(pyridin-2-yl)-1H-1,2,3-triazol-1-yl)tetrahydro-2H-pyran-3,4,5-triyl triacetate (B<sub>10</sub>):** Isolated as brown solid (45 mg, 95%). <sup>1</sup>H NMR (700 MHz, CDCl<sub>3</sub>) δ 8.60 (s, 1H), 8.40 (s, 1H), 8.14 (d, *J* = 7.3 Hz, 1H), 7.77 (d, *J* = 6.8 Hz, 1H), 7.25 (s, 1H), 5.92 (d, *J* = 8.9 Hz, 1H), 5.47 (dt, *J* = 31.7, 8.3 Hz, 2H), 5.33 – 5.23 (m, 2H), 4.31 (dd, *J* = 12.5, 4.7 Hz, 1H), 4.16 (d, *J* = 12.5 Hz, 1H), 4.02 (d, *J* = 5.3 Hz, 1H), 2.08 (d, *J* = 12.7 Hz, 6H), 2.04 (s, 3H), 1.89 (s, 3H). <sup>13</sup>C NMR (101 MHz, CDCl<sub>3</sub>) δ 170.61, 170.06, 169.41, 168.93, 149.63, 149.05, 136.97, 123.27, 120.68, 120.47, 85.93, 75.18, 72.75, 70.56, 67.72, 61.58, 20.74, 20.61, 20.60, 20.26.

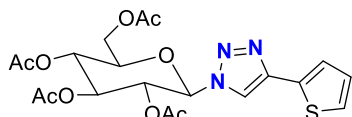

**(2R,3R,4S,5R,6R)-2-(acetoxymethyl)-6-(4-(thiophen-2-yl)-1H-1,2,3-triazol-1-yl)tetrahydro-2H-pyran-3,4,5-triyl triacetate (B<sub>11</sub>):** Isolated as off white solid (45 mg, 94%). <sup>1</sup>H NMR (400 MHz, CDCl<sub>3</sub>) δ 7.91 (s, 1H), 7.41 (dd, *J* = 3.6, 1.0 Hz, 1H), 7.32 (dd, *J* = 5.0, 1.0 Hz, 1H), 7.08 (dd, *J* = 5.0, 3.6 Hz, 1H), 5.91 (d, *J* = 9.1 Hz, 1H), 5.46 (dt, *J* = 25.3, 9.5 Hz, 2H), 5.26 (t, *J* = 9.6 Hz, 1H), 4.33 (dd, *J* = 12.6, 5.1 Hz, 1H), 4.16 (dd, *J* = 12.6, 1.9 Hz, 1H), 4.02 (ddd, *J* = 10.0, 5.0, 2.0 Hz, 1H), 2.08 (d, *J* = 6.0 Hz, 6H), 2.03 (s, 3H), 1.89 (s, 3H). <sup>13</sup>C NMR (101 MHz, CDCl<sub>3</sub>) δ 170.65, 170.06, 169.51, 169.15, 143.77, 132.22, 127.82, 125.71, 124.96, 117.25, 85.98, 75.35, 72.83, 70.34, 67.83, 61.70, 20.83, 20.68, 20.65, 20.33.



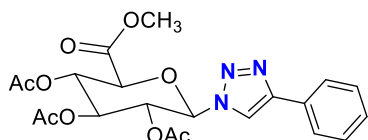

**(2S,3S,4S,5R,6R)-2-(methoxycarbonyl)-6-(4-phenyl-1H-1,2,3-triazol-1-yl)tetrahydro-2H-pyran-3,4,5-triyl triacetate(C<sub>1</sub>):** Isolated as white solid (44 mg, 95%). <sup>1</sup>H NMR (400 MHz, DMSO) δ 9.05 (s, 1H), 7.84 (d, *J* = 7.3 Hz, 2H), 7.48 (t, *J* = 7.6 Hz, 2H), 7.38 (d, *J* = 7.4 Hz, 1H), 6.47 (d, *J* = 9.1 Hz, 1H), 5.77 (t, *J* = 9.3 Hz, 1H), 5.68 (t, *J* = 9.4 Hz, 1H), 5.24 (t, *J* = 9.8 Hz, 1H), 4.87 (d, *J* = 10.0 Hz, 1H), 3.64 (s, 3H), 2.04 (s, 3H), 2.00 (s, 3H), 1.81 (s, 3H). <sup>13</sup>C NMR (101 MHz,) δ 169.52, 169.34, 168.53, 166.58, 147.02, 129.96, 129.04, 128.36, 125.22, 120.57, 83.84, 72.88, 71.42, 69.93, 68.47, 52.68, 23.05, 20.26, 20.22, 19.89.

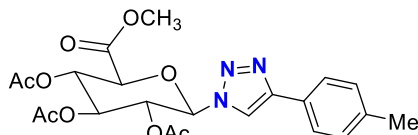

**(2S,3S,4S,5R,6R)-2-(methoxycarbonyl)-6-(4-(p-tolyl)-1H-1,2,3-triazol-1-yl)tetrahydro-2H-pyran-3,4,5-triyl triacetate(C<sub>2</sub>):** Isolated as off white solid (46.5 mg, 98%). <sup>1</sup>H NMR (400 MHz, CDCl<sub>3</sub>) δ 7.80 (s, 1H), 7.75 (d, *J* = 8.0 Hz, 2H), 7.23 (d, *J* = 7.9 Hz, 2H), 5.16 (t, *J* = 9.5 Hz, 1H), 5.11 – 4.99 (m, 2H), 4.68 (dd, *J* = 11.3, 3.5 Hz, 1H), 4.58 – 4.48 (m, 1H), 4.45 (d, *J* = 7.9 Hz, 1H), 4.31 – 4.23 (m, 2H), 4.12 (d, *J* = 12.4 Hz, 1H), 3.94 – 3.86 (m, 1H), 3.69 (dd, *J* = 9.9, 2.4 Hz, 1H), 2.37 (s, 3H), 2.08 (s, 3H), 2.02 (s, 3H), 1.98 (s, 3H), 1.71 (s, 3H). <sup>13</sup>C NMR (101 MHz, DMSO) δ 169.50, 169.31, 168.50, 166.57, 147.06, 137.71, 129.55, 127.19, 125.15, 120.09, 83.80, 72.85, 71.44, 69.90, 68.46, 52.65, 20.83, 20.25, 20.21, 19.89. HRMS (ESI-TOF) *m/z*: [M + H]<sup>+</sup> calcd for C<sub>22</sub>H<sub>26</sub>N<sub>3</sub>O<sub>9</sub> 476.1669; Found 476.1689.

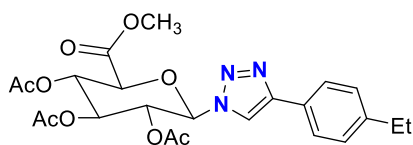

**(2R,3R,4S,5S,6S)-2-(4-(4-ethylphenyl)-1H-1,2,3-triazol-1-yl)-6-(methoxycarbonyl)tetrahydro-2H-pyran-3,4,5-triyl triacetate(C<sub>3</sub>):** Isolated as white solid (47.4 mg, 97%). NMR (400 MHz, CDCl<sub>3</sub>) δ 8.00 (s, 1H), 7.73 (d, *J* = 8.0 Hz, 2H), 7.25 (s, 2H), 5.95 (d, *J* = 8.9 Hz, 1H), 5.50 (dd, *J* = 11.8, 8.9 Hz, 2H), 5.38 (s, 1H), 4.32 (d, *J* = 9.8 Hz, 1H), 3.74 (s, 3H), 2.66 (d, *J* = 7.6 Hz, 2H), 2.05 (d, *J* = 9.4 Hz, 6H), 1.86 (s, 3H), 1.24 (t, *J* = 7.6 Hz, 3H). <sup>13</sup>C NMR (101 MHz, CDCl<sub>3</sub>) δ 169.91, 169.49, 169.06, 166.36, 148.85, 145.05, 128.53, 127.38, 126.06, 117.61, 85.64, 75.10, 72.16, 70.05, 69.18, 53.31, 28.84, 20.66, 20.60, 20.29, 15.64. HRMS(ESI-TOF)*m/z*: [M+H]<sup>+</sup> calcd for C<sub>23</sub>H<sub>28</sub>N<sub>3</sub>O<sub>9</sub> 490.1826; Found 490.1811

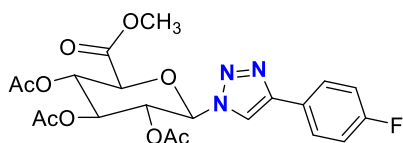

**(2R,3R,4S,5S,6S)-2-(4-(4-fluorophenyl)-1H-1,2,3-triazol-1-yl)-6-(methoxycarbonyl)tetrahydro-2H-pyran-3,4,5-triyl triacetate(C<sub>4</sub>):** Isolated as of white solid (45 mg, 94%). <sup>1</sup>H NMR (400 MHz, CDCl<sub>3</sub>) δ 8.03 (s, 1H), 7.84 – 7.76 (m, 2H), 7.12 (dd, *J* = 12.0, 5.4 Hz, 2H), 6.01 – 5.93 (m, 1H), 5.56 – 5.46 (m, 2H), 5.39 (t, *J* = 9.5 Hz, 1H), 4.35 (d, *J* = 9.8 Hz, 1H), 3.75 (s, 3H), 2.07 (s, 3H), 2.05 (s, 3H), 1.89 (s, 3H). <sup>13</sup>C NMR (101 MHz, CDCl<sub>3</sub>) δ 169.87, 169.48, 169.10, 166.34, 161.83, 147.87, 127.85, 126.19, 117.81, 116.15,

115.94, 85.67, 75.07, 72.06, 70.11, 69.15, 53.32, 20.65, 20.58, 20.30. HRMS (ESI-TOF)  $m/z$ :  $[M + H]^+$  calcd for  $C_{21}H_{23}N_3O_9$  480.1418; Found 480.1389.

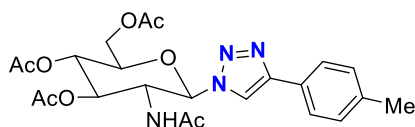

**(2R,3S,6S)-5-acetamido-2-(acetoxymethyl)-6-(4-(p-tolyl)-1H-1,2,3-triazol-1-yl)tetrahydro-2H-pyran-3,4-diyl diacetate(D<sub>1</sub>):** Isolated as white solid (48.8 mg, 98%). <sup>1</sup>H NMR (400 MHz, DMSO)  $\delta$  8.79 (s, 1H), 8.13 (d,  $J = 9.2$  Hz, 1H), 7.72 (d,  $J = 8.1$  Hz, 2H), 7.28 (d,  $J = 8.0$  Hz, 2H), 6.13 (d,  $J = 9.9$  Hz, 1H), 5.39 (t,  $J = 9.9$  Hz, 1H), 5.11 (t,  $J = 9.8$  Hz, 1H), 4.65 (d,  $J = 9.7$  Hz, 1H), 4.28 (ddd,  $J = 10.1, 5.0, 2.2$  Hz, 1H), 4.17 (dd,  $J = 12.5, 5.1$  Hz, 1H), 4.08 (dd,  $J = 12.4, 2.0$  Hz, 1H), 2.33 (s, 3H), 2.02 (s, 3H), 2.00 (s, 3H), 1.96 (s, 3H), 1.59 (s, 3H). <sup>13</sup>C NMR (101 MHz, DMSO)  $\delta$  169.50, 169.31, 168.50, 166.57, 147.06, 137.71, 129.55, 127.19, 125.15, 120.09, 83.80, 72.85, 71.44, 69.90, 68.46, 52.65, 20.83, 20.25, 20.21, 19.89. HRMS (ESI-TOF)  $m/z$ :  $[M + H]^+$  calcd for  $C_{23}H_{29}N_4O_8$  489.1985; Found 489.1937.

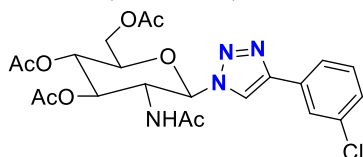

**(2R,3S,6S)-5-acetamido-2-(acetoxymethyl)-6-(4-(3-chlorophenyl)-1H-1,2,3-triazol-1-yl)tetrahydro-2H-pyran-3,4-diyl diacetate(D<sub>2</sub>):** Isolated as white solid (47.3 mg, 93%). <sup>1</sup>H NMR (400 MHz, DMSO)  $\delta$  9.01 (s, 1H), 8.15 (d,  $J = 9.1$  Hz, 1H), 7.90 (s, 1H), 7.82 (d,  $J = 7.9$  Hz, 1H), 7.52 (t,  $J = 7.9$  Hz, 1H), 7.44 (d,  $J = 8.0$  Hz, 1H), 6.16 (d,  $J = 9.9$  Hz, 1H), 5.38 (d,  $J = 9.9$  Hz, 1H), 5.10 (t,  $J = 9.8$  Hz, 1H), 4.63 (d,  $J = 9.8$  Hz, 1H), 4.32 (d,  $J = 7.3$  Hz, 1H), 4.19 (dd,  $J = 12.6, 5.0$  Hz, 1H), 4.09 (d,  $J = 10.7$  Hz, 1H), 2.03 (s,  $J = 7.1$  Hz, 3H), 2.02 (s, 3H), 1.97 (s, 3H), 1.60 (s, 3H). <sup>13</sup>C NMR (101 MHz, DMSO)  $\delta$  170.03, 169.58, 169.50, 169.37, 145.49, 131.99, 129.48, 127.17, 121.18, 120.65, 84.95, 73.38, 72.25, 68.02, 61.74, 52.35, 22.31, 20.52, 20.42, 20.28. HRMS (ESI-TOF)  $m/z$ :  $[M + H]^+$  calcd for  $C_{22}H_{26}ClN_4O_8$  509.1439; Found 509.1446.

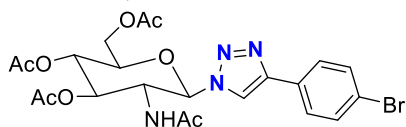

**(2R,3S,6S)-5-acetamido-2-(acetoxymethyl)-6-(4-(3-bromophenyl)-1H-1,2,3-triazol-1-yl)tetrahydro-2H-pyran-3,4-diyl diacetate(D<sub>3</sub>):** Isolated as white solid (51.4 mg, 92%). <sup>1</sup>H NMR (400 MHz, DMSO)  $\delta$  8.92 (s, 1H), 8.11 (d,  $J = 9.2$  Hz, 1H), 7.81 – 7.77 (m, 2H), 7.69 – 7.66 (m, 2H), 6.15 (d,  $J = 9.9$  Hz, 1H), 5.39 (t,  $J = 9.9$  Hz, 1H), 5.11 (t,  $J = 9.8$  Hz, 1H), 4.64 (q,  $J = 9.8$  Hz, 1H), 4.29 (ddd,  $J = 10.1, 5.0, 2.2$  Hz, 1H), 4.18 (dd,  $J = 12.5, 5.0$  Hz, 1H), 4.09 (dd,  $J = 12.5, 2.1$  Hz, 1H), 2.02 (s, 3H), 2.01 (s, 3H), 1.96 (s, 3H), 1.59 (s, 3H). <sup>13</sup>C NMR (101 MHz, DMSO)  $\delta$  170.03, 169.58, 169.50, 169.37, 145.49, 131.99, 129.48, 127.17, 121.18, 120.65, 84.95, 73.38, 72.25, 68.02, 61.74, 52.35, 22.31, 20.52, 20.42, 20.28.

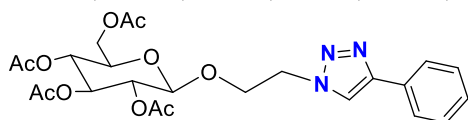

**(2R,3R,4S,5R,6R)-2-(acetoxymethyl)-6-(2-(4-phenyl-1H-1,2,3-triazol-1-yl)ethoxy)tetrahydro-2H-pyran-3,4,5-triyl triacetate(E<sub>1</sub>):** Isolated as white solid (50.9 mg, 98%). <sup>1</sup>H NMR (400 MHz, CDCl<sub>3</sub>)  $\delta$  7.88 (s, 1H), 7.86 (s, 2H), 7.42 (t,  $J = 7.5$  Hz, 2H), 7.32 (t,  $J = 7.3$  Hz, 1H), 5.16 (t,  $J = 9.5$  Hz, 1H), 5.12 – 4.97 (m, 2H), 4.70 (d,  $J = 14.7$  Hz, 1H), 4.54 (dd,  $J = 12.1, 9.2$  Hz, 1H), 4.46 (d,  $J = 7.9$  Hz, 1H), 4.33 – 4.21 (m, 2H), 4.12 (d,  $J = 11.0$

Hz, 1H), 3.91 (t,  $J = 8.6$  Hz, 1H), 3.75 – 3.64 (m, 1H), 2.07 (s, 3H), 2.01 (s, 3H), 1.97 (s, 3H), 1.71 (s, 3H).  $^{13}\text{C}$  NMR (101 MHz,  $\text{CDCl}_3$ )  $\delta$  170.76, 170.22, 169.65, 169.57, 130.54, 128.96, 128.30, 125.78, 121.67, 100.62, 72.49, 72.04, 70.96, 68.25, 68.00, 61.76, 50.19, 20.86, 20.71, 20.68, 20.49.

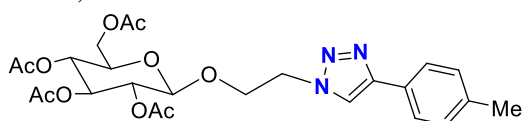

**(2R,3R,4S,5R,6R)-2-(acetoxymethyl)-6-(2-(4-(p-tolyl)-1H-1,2,3-triazol-1-yl)ethoxy)tetrahydro-2H-pyran-3,4,5-triyl triacetate ( $\text{E}_2$ )** : Isolated as off white solid (50.6 mg, 95%).  $^1\text{H}$  NMR (400 MHz,  $\text{CDCl}_3$ )  $\delta$  7.80 (s, 1H), 7.75 (d,  $J = 8.0$  Hz, 2H), 7.23 (d,  $J = 7.9$  Hz, 2H), 5.16 (t,  $J = 9.5$  Hz, 1H), 5.11 – 4.99 (m, 2H), 4.68 (dd,  $J = 11.3, 3.5$  Hz, 1H), 4.58 – 4.48 (m, 1H), 4.45 (d,  $J = 7.9$  Hz, 1H), 4.31 – 4.23 (m, 2H), 4.12 (d,  $J = 12.4$  Hz, 1H), 3.94 – 3.86 (m, 1H), 3.69 (dd,  $J = 9.9, 2.4$  Hz, 1H), 2.37 (s, 3H), 2.08 (s, 3H), 2.02 (s, 3H), 1.98 (s, 3H), 1.71 (s, 3H).  $^{13}\text{C}$  NMR (101 MHz,  $\text{CDCl}_3$ )  $\delta$  170.76, 170.23, 169.65, 169.58, 130.59, 128.96, 128.28, 125.77, 121.60, 100.63, 72.50, 72.04, 70.97, 68.25, 68.01, 61.76, 50.17, 20.86, 20.71, 20.68, 20.49.

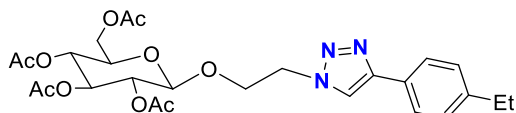

**(2R,3R,4S,5R,6R)-2-(acetoxymethyl)-6-(2-(4-(4-ethylphenyl)-1H-1,2,3-triazol-1-yl)ethoxy)tetrahydro-2H-pyran-3,4,5-triyl triacetate ( $\text{E}_3$ )** : Isolated as white solid (52.5 mg, 96%).  $^1\text{H}$  NMR (400 MHz,  $\text{CDCl}_3$ )  $\delta$  7.80 (s, 1H), 7.76 (d,  $J = 8.0$  Hz, 2H), 7.24 (d,  $J = 8.0$  Hz, 2H), 5.15 (t,  $J = 9.5$  Hz, 1H), 5.08 – 4.98 (m, 2H), 4.71 – 4.60 (m, 1H), 4.55 – 4.48 (m, 1H), 4.45 (d,  $J = 7.9$  Hz, 1H), 4.29 – 4.20 (m, 2H), 4.11 (dd,  $J = 12.3, 2.0$  Hz, 1H), 3.90 (td,  $J = 9.7, 2.7$  Hz, 1H), 3.68 (ddd,  $J = 9.8, 4.6, 2.3$  Hz, 1H), 2.65 (q,  $J = 7.6$  Hz, 2H), 2.05 (s, 3H), 2.00 (s, 3H), 1.96 (s, 3H), 1.71 (s, 3H), 1.23 (t,  $J = 7.6$  Hz, 3H).  $^{13}\text{C}$  NMR (101 MHz,  $\text{CDCl}_3$ )  $\delta$  170.68, 170.14, 169.58, 169.51, 147.82, 144.43, 128.39, 128.01, 125.75, 121.16, 100.62, 72.54, 72.03, 70.99, 68.31, 68.00, 61.78, 50.11, 28.73, 20.78, 20.64, 20.62, 20.46, 15.56.

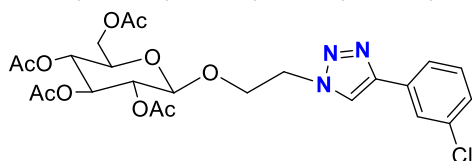

**(2R,3R,4S,5R,6R)-2-(acetoxymethyl)-6-(2-(4-(3-chlorophenyl)-1H-1,2,3-triazol-1-yl)ethoxy)tetrahydro-2H-pyran-3,4,5-triyl triacetate ( $\text{E}_4$ )** : Isolated as white solid (51.5 mg, 93%).  $^1\text{H}$  NMR (400 MHz,  $\text{CDCl}_3$ )  $\delta$  7.85 (s, 1H), 7.75 (d,  $J = 8.3$  Hz, 2H), 7.54 (d,  $J = 8.3$  Hz, 2H), 5.16 (t,  $J = 9.5$  Hz, 1H), 5.11 – 4.96 (m, 2H), 4.68 (d,  $J = 14.5$  Hz, 1H), 4.59 – 4.48 (m, 1H), 4.46 (d,  $J = 7.8$  Hz, 1H), 4.25 (dd,  $J = 12.1, 4.6$  Hz, 2H), 4.12 (d,  $J = 11.2$  Hz, 1H), 3.90 (t,  $J = 8.4$  Hz, 1H), 3.69 (d,  $J = 7.6$  Hz, 1H), 2.06 (s, 3H), 2.01 (s, 3H), 1.98 (s, 3H), 1.73 (s, 3H).  $^{13}\text{C}$  NMR (101 MHz,  $\text{CDCl}_3$ )  $\delta$  170.58, 170.07, 169.49, 169.43, 146.60, 131.99, 129.52, 127.22, 122.02, 121.64, 100.50, 72.37, 71.99, 70.94, 68.21, 67.76, 61.69, 50.13, 20.71, 20.56, 20.54, 20.43. HRMS (ESI-TOF)  $m/z$ :  $[\text{M} + \text{H}]^+$  calcd for  $\text{C}_{24}\text{H}_{29}\text{ClN}_3\text{O}_{10}$  554.1389; Found 554.1542.

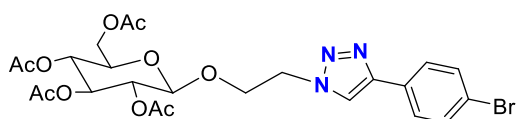

**(2R,3R,4S,5R,6R)-2-(acetoxymethyl)-6-(2-(4-(4-bromophenyl)-1H-1,2,3-triazol-1-yl)ethoxy)tetrahydro-2H-pyran-3,4,5-triyl triacetate ( $\text{E}_5$ )** : Isolated as white solid (54.4 mg, 91%).  $^1\text{H}$  NMR (400 MHz,  $\text{CDCl}_3$ )  $\delta$  7.85 (s, 1H), 7.75 (d,  $J = 8.3$  Hz, 2H), 7.54 (d,  $J = 8.3$  Hz, 2H), 5.16 (t,  $J = 9.5$  Hz, 1H), 5.11 – 4.96 (m, 2H), 4.68 (d,  $J = 14.5$  Hz, 1H), 4.59 – 4.48 (m,

1H), 4.46 (d,  $J = 7.8$  Hz, 1H), 4.25 (dd,  $J = 12.1, 4.6$  Hz, 2H), 4.12 (d,  $J = 11.2$  Hz, 1H), 3.90 (t,  $J = 8.4$  Hz, 1H), 3.69 (d,  $J = 7.6$  Hz, 1H), 2.06 (s, 3H), 2.01 (s, 3H), 1.98 (s, 3H), 1.73 (s, 3H).  $^{13}\text{C}$  NMR (101 MHz,  $\text{CDCl}_3$ )  $\delta$  170.58, 170.07, 169.49, 169.43, 146.60, 131.99, 129.52, 127.22, 122.02, 121.64, 100.50, 72.37, 71.99, 70.94, 68.21, 67.76, 61.69, 50.13, 20.71, 20.56, 20.54, 20.43. HRMS (ESI-TOF)  $m/z$ :  $[\text{M} + \text{H}]^+$  calcd for  $\text{C}_{24}\text{H}_{28}\text{BrN}_3\text{O}_{10}$  598.1036; Found 598.1036.

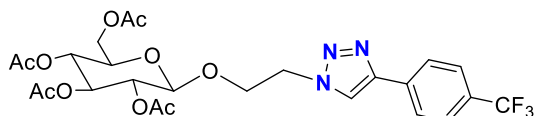

**(2R,3R,4S,5R,6R)-2-(acetoxymethyl)-6-(2-(4-(4-(trifluoromethyl)phenyl)-1H-1,2,3-triazol-1-yl)ethoxy)tetrahydro-2H-pyran-3,4,5-triyl triacetate(E<sub>6</sub>):** Isolated as white solid (52.8 mg, 90%).  $^1\text{H}$  NMR (400 MHz,  $\text{CDCl}_3$ )  $\delta$  8.00 (d,  $J = 8.1$  Hz, 2H), 7.95 (s, 1H), 7.68 (d,  $J = 8.2$  Hz, 2H), 5.17 (t,  $J = 9.5$  Hz, 1H), 5.10 – 4.98 (m, 2H), 4.75 – 4.64 (m, 1H), 4.60 – 4.51 (m, 1H), 4.47 (d,  $J = 7.9$  Hz, 1H), 4.31 – 4.22 (m, 2H), 4.13 (dd,  $J = 12.3, 2.0$  Hz, 1H), 3.92 (td,  $J = 10.0, 2.5$  Hz, 1H), 3.70 (ddd,  $J = 9.7, 4.4, 2.1$  Hz, 1H), 2.06 (s, 3H), 2.01 (s, 3H), 1.98 (s, 3H), 1.73 (s, 3H).  $^{13}\text{C}$  NMR (101 MHz,  $\text{CDCl}_3$ )  $\delta$  170.69, 170.18, 169.59, 169.55, 146.38, 134.14, 130.25, 129.92, 125.97, 125.76, 122.51, 100.62, 72.47, 72.14, 71.09, 68.34, 67.79, 61.82, 50.33, 20.81, 20.67, 20.65, 20.54. HRMS (ESI-TOF)  $m/z$ :  $[\text{M} + \text{H}]^+$  calcd for  $\text{C}_{25}\text{H}_{29}\text{F}_3\text{N}_3\text{O}_{10}$  588.1805; Found 588.2238.

## NMR spectra of the products:

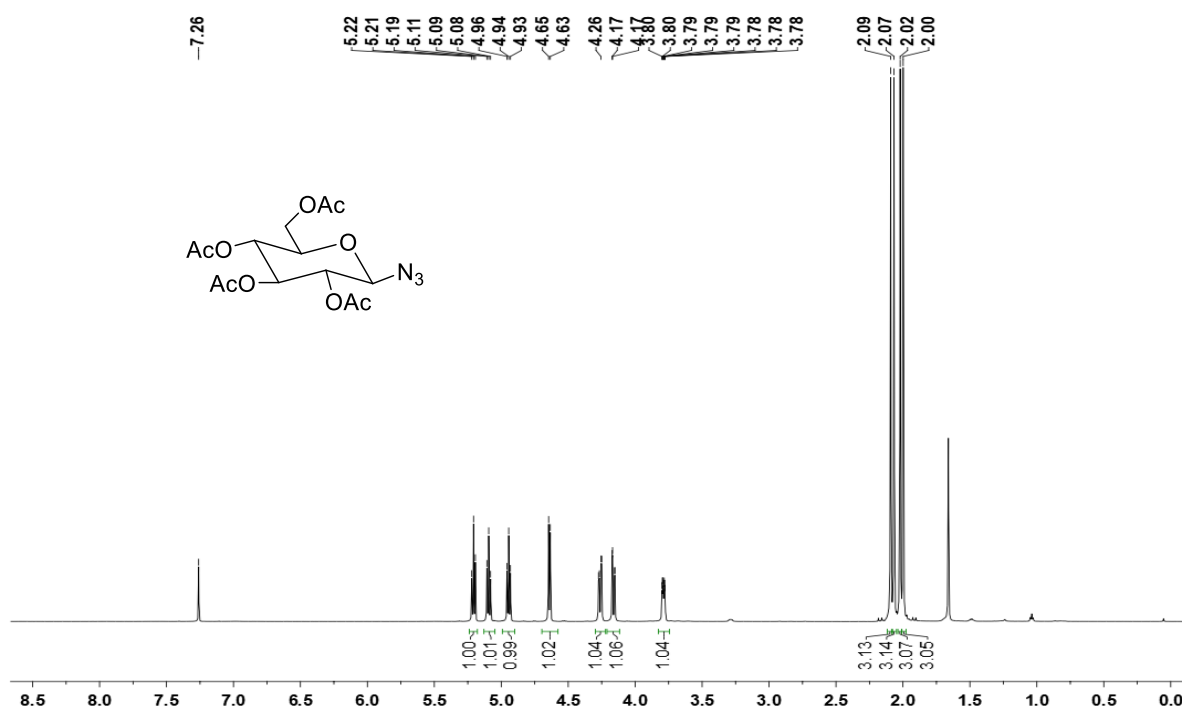

**Figure S7.** <sup>1</sup>H NMR of (2R,3R,4S,5R,6R)-2-(acetoxymethyl)-6-azidotetrahydro-2H-pyran-3,4,5-triyl triacetate in CDCl<sub>3</sub> at r.t.

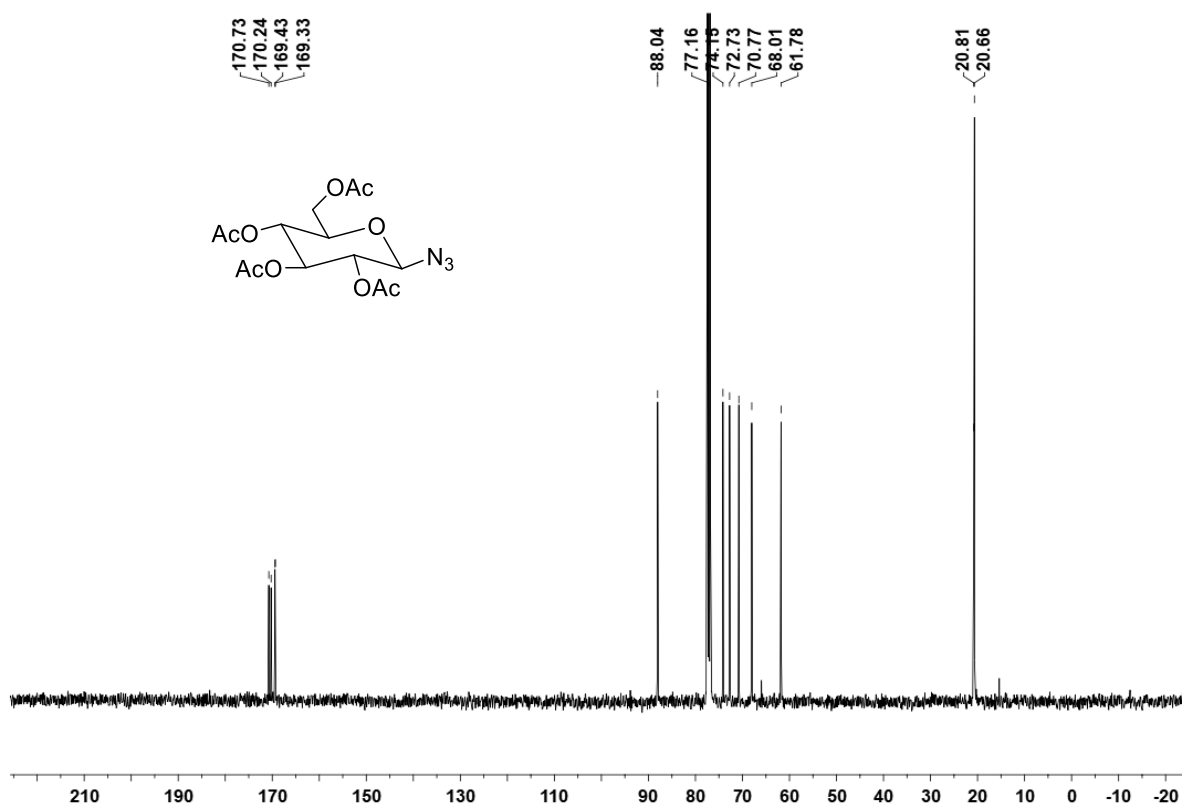

**Figure S8.** <sup>13</sup>C NMR of (2R,3R,4S,5R,6R)-2-(acetoxymethyl)-6-azidotetrahydro-2H-pyran-3,4,5-triyl triacetate in CDCl<sub>3</sub> at r.t.

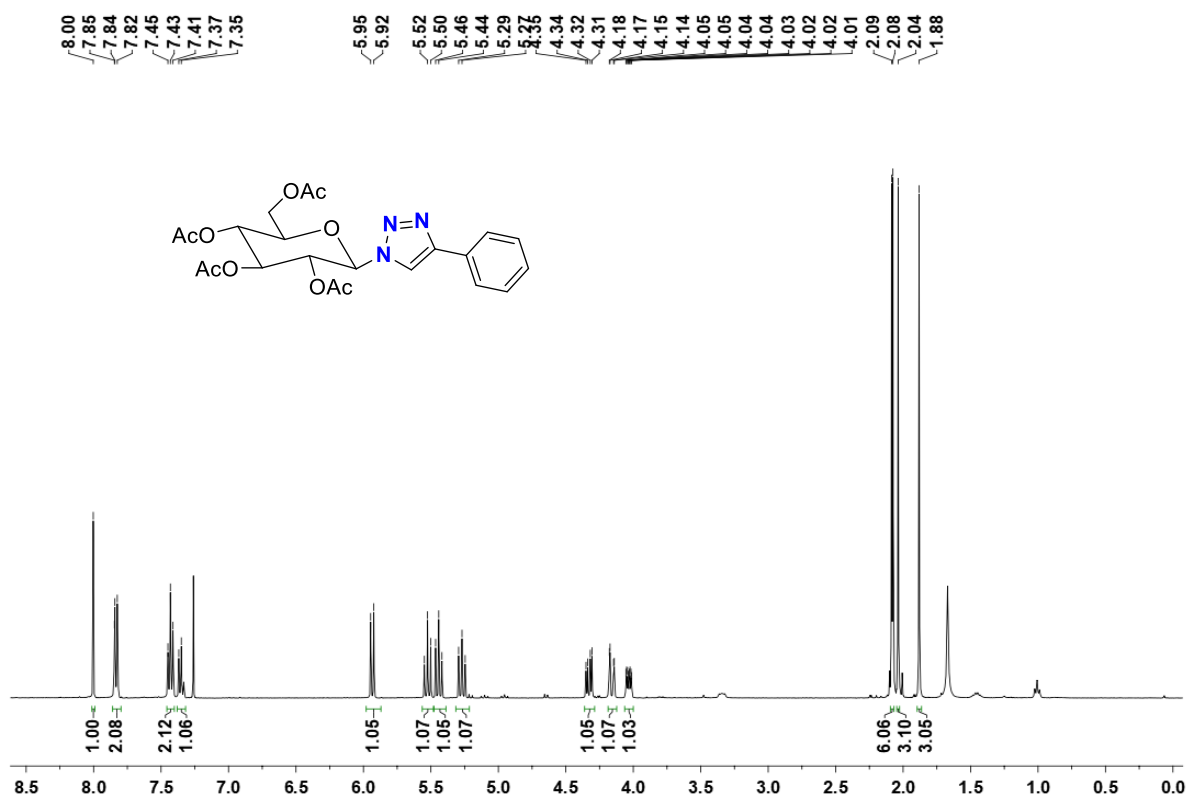

**Figure S9.** <sup>1</sup>H NMR (400 MHz) spectrum of (2R,3R,4S,5R,6R)-2-(acetoxymethyl)-6-(4-phenyl-1H-1,2,3-triazol-1-yl) tetrahydro-2H-pyran-3,4,5-triyl triacetate (A) in CDCl<sub>3</sub> at r.t.

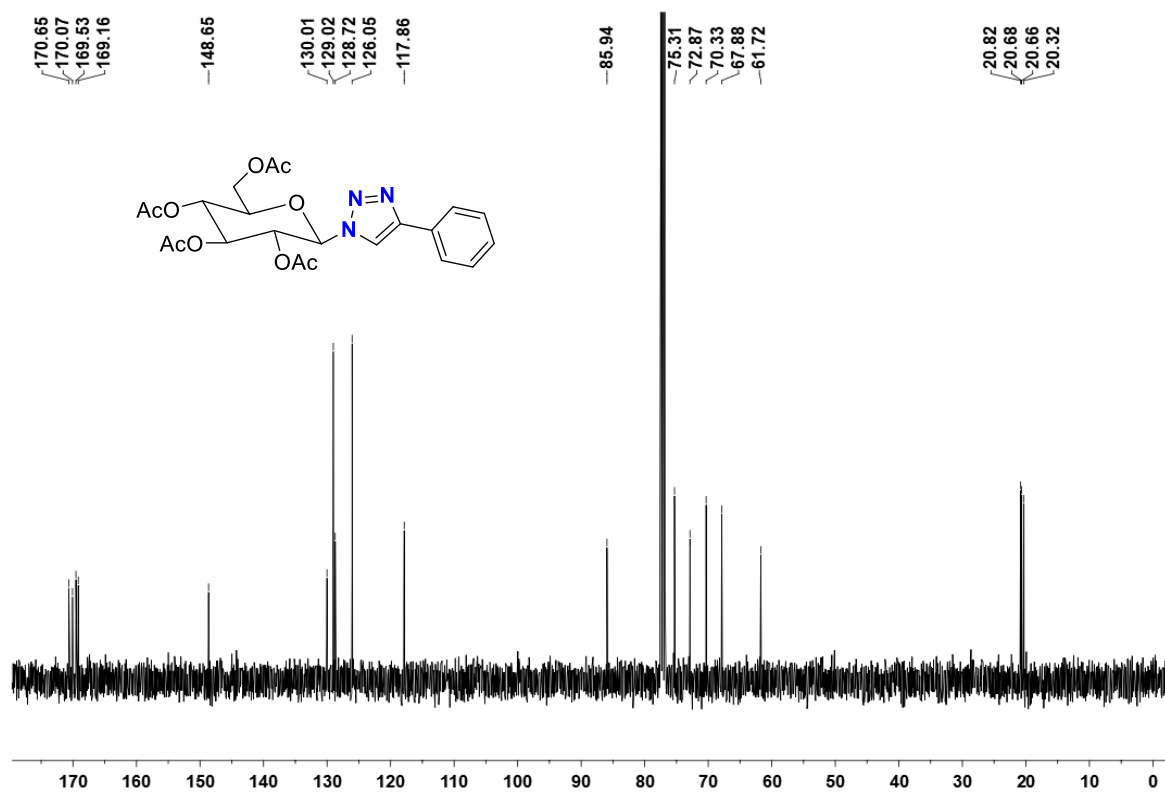

**Figure S10.** <sup>13</sup>C NMR (101 MHz) spectrum of (2R,3R,4S,5R,6R)-2-(acetoxymethyl)-6-(4-phenyl-1H-1,2,3-triazol-1-yl) tetrahydro-2H-pyran-3,4,5-triyl triacetate (A) in CDCl<sub>3</sub> at r.t.

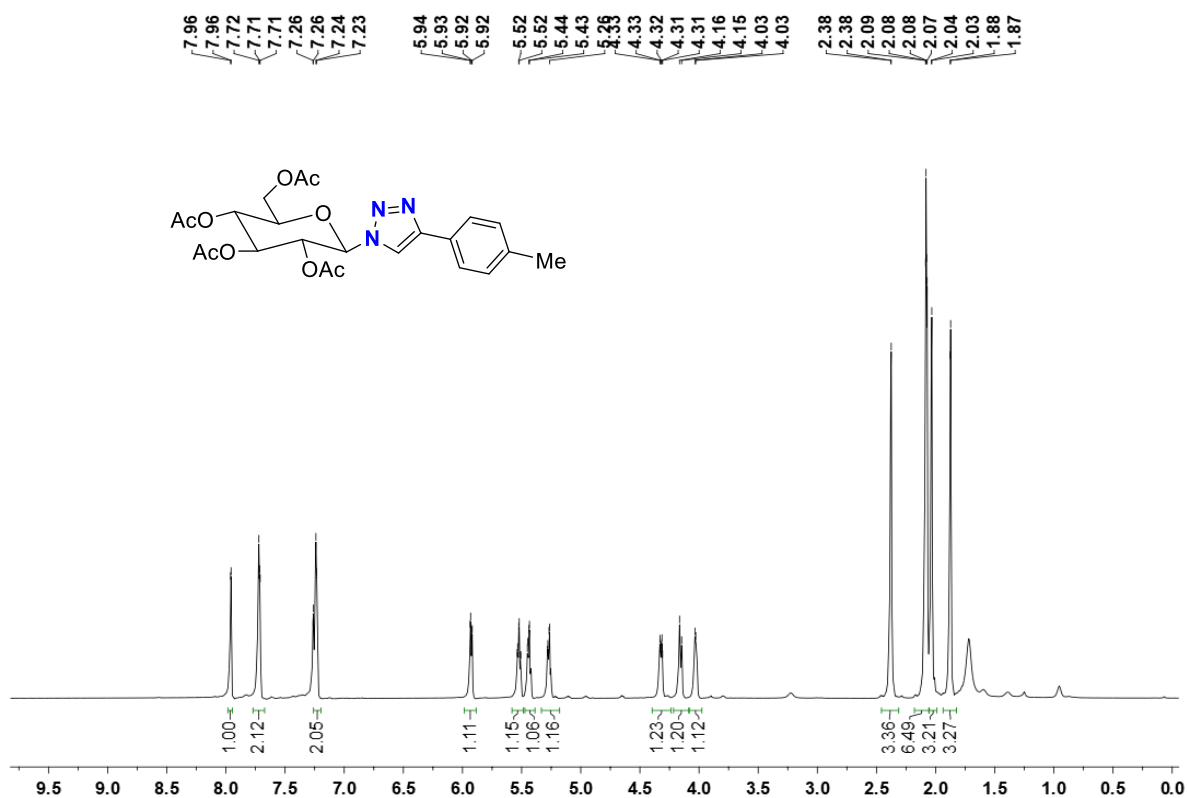

**Figure S11.**  $^1\text{H}$  NMR (400 MHz) spectrum of (2R,3R,4S,5R,6R)-2-(acetoxymethyl)-6-(4-(p-tolyl)-1H-1,2,3-triazol-1-yl)tetrahydro-2H-pyran-3,4,5-triyl triacetate (**B1**)  $\text{CDCl}_3$  at r.t.

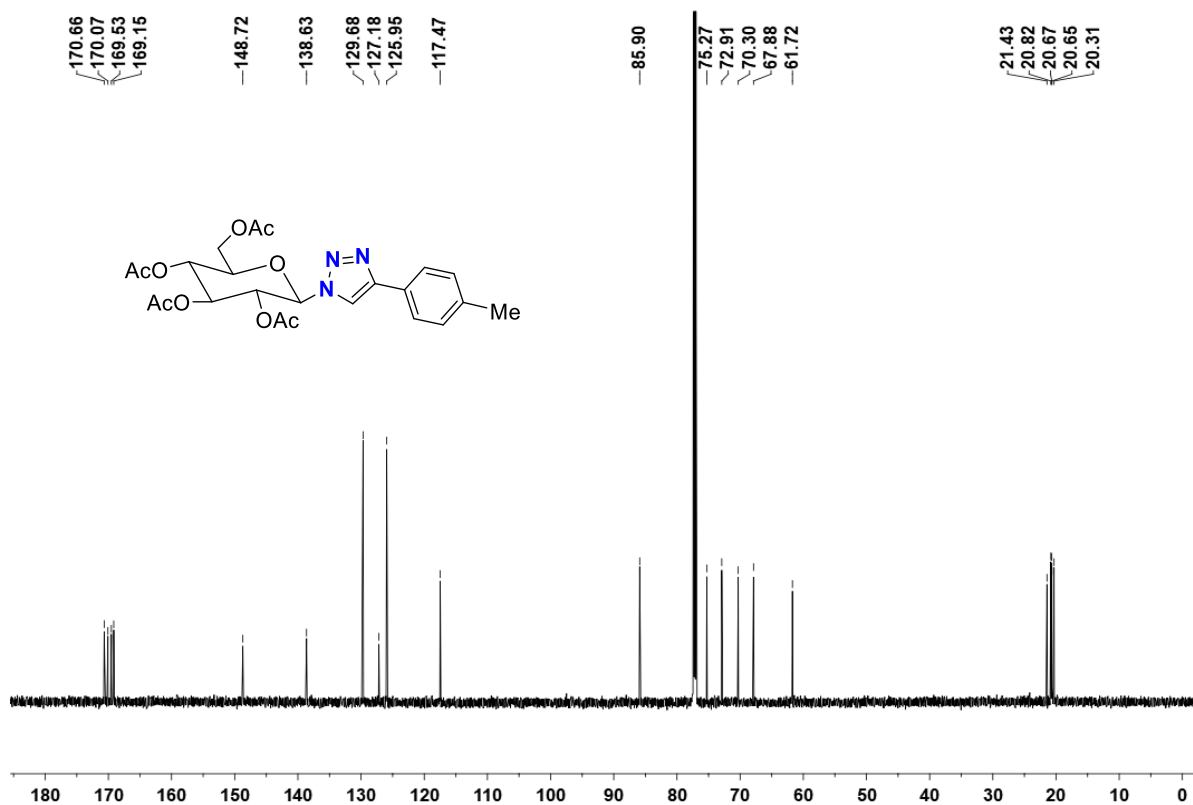

**Figure S12.**  $^{13}\text{C}$  NMR (101 MHz) spectrum of (2R,3R,4S,5R,6R)-2-(acetoxymethyl)-6-(4-(p-tolyl)-1H-1,2,3-triazol-1-yl)tetrahydro-2H-pyran-3,4,5-triyl triacetate (**B1**) in  $\text{CDCl}_3$  at

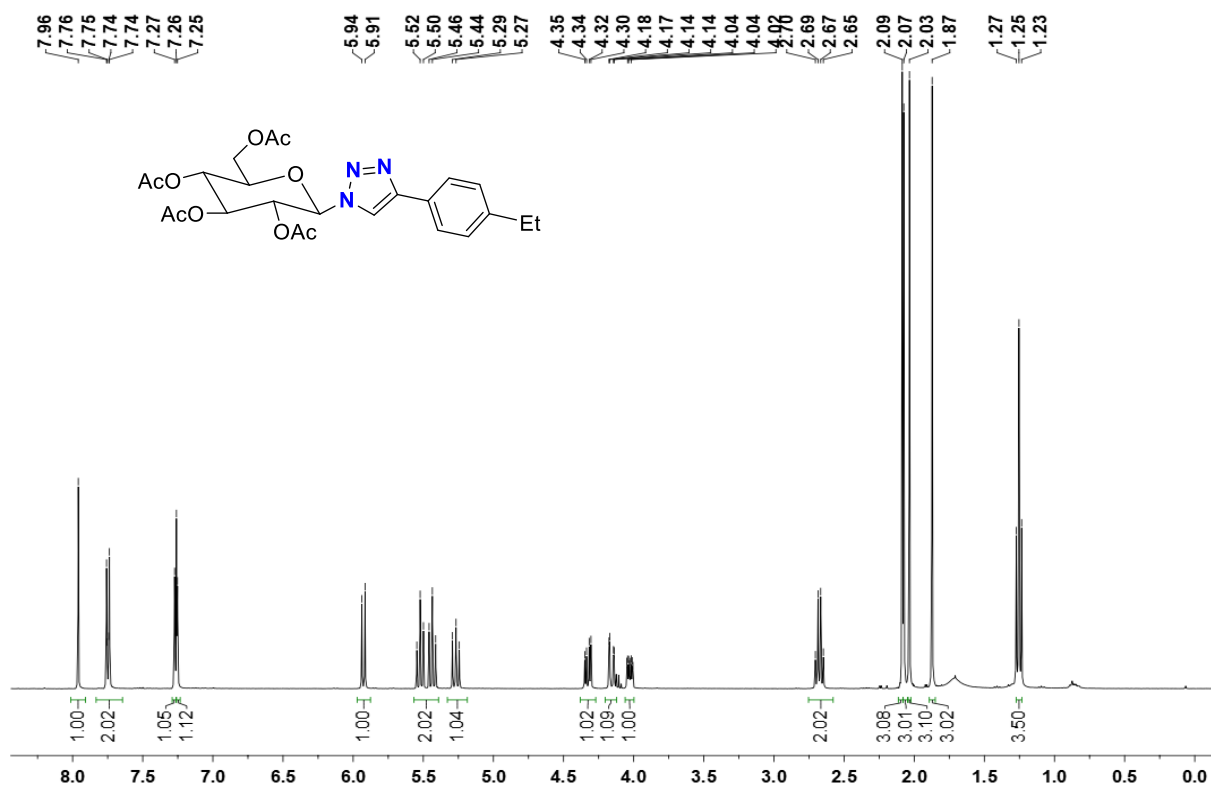

**Figure S13.**  $^1\text{H}$  NMR (400 MHz) spectrum of (2R,3R,4S,5R,6R)-2-(acetoxymethyl)-6-(4-(4-ethylphenyl)-1H-1,2,3-triazol-1-yl)tetrahydro-2H-pyran-3,4,5-triyl triacetate (**B2**)  $\text{CDCl}_3$  at r.t.

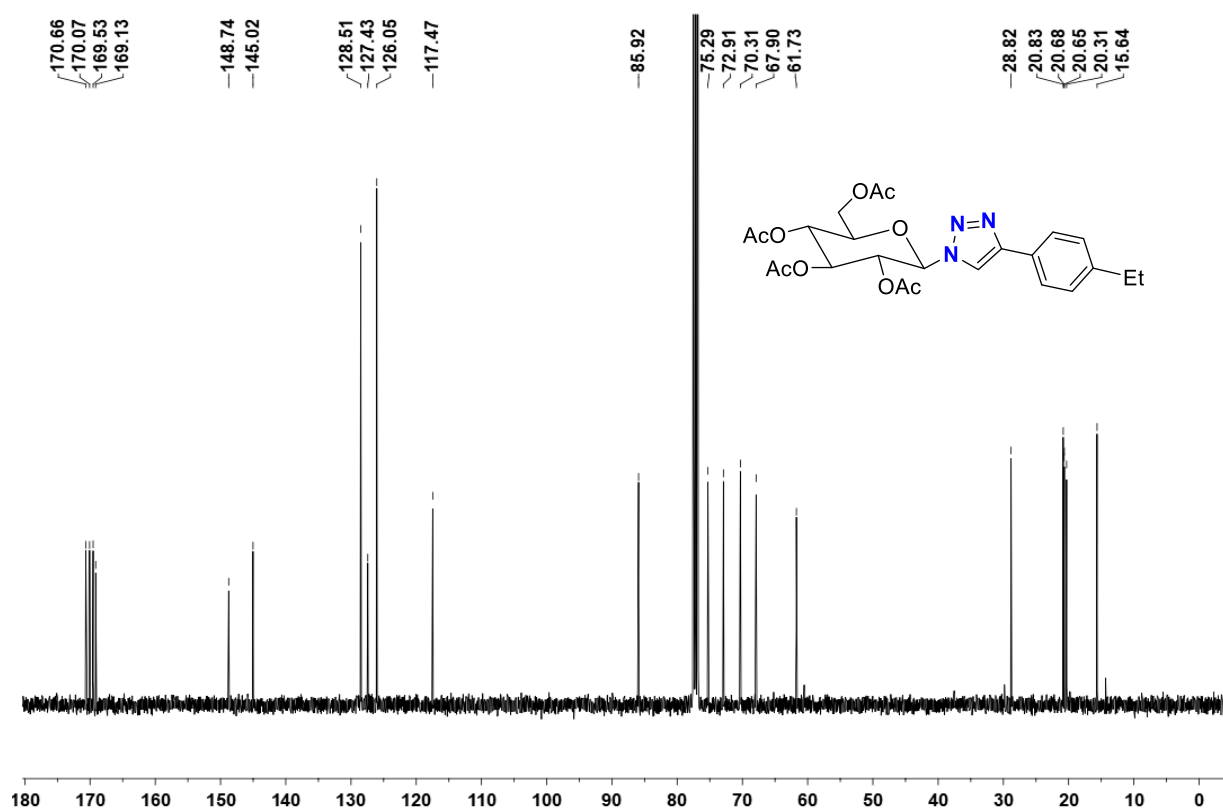

**Figure S14.**  $^{13}\text{C}$  NMR (400 MHz) spectrum of (2R,3R,4S,5R,6R)-2-(acetoxymethyl)-6-(4-(4-ethylphenyl)-1H-1,2,3-triazol-1-yl)tetrahydro-2H-pyran-3,4,5-triyl triacetate (**B2**)  $\text{CDCl}_3$  at r.t.



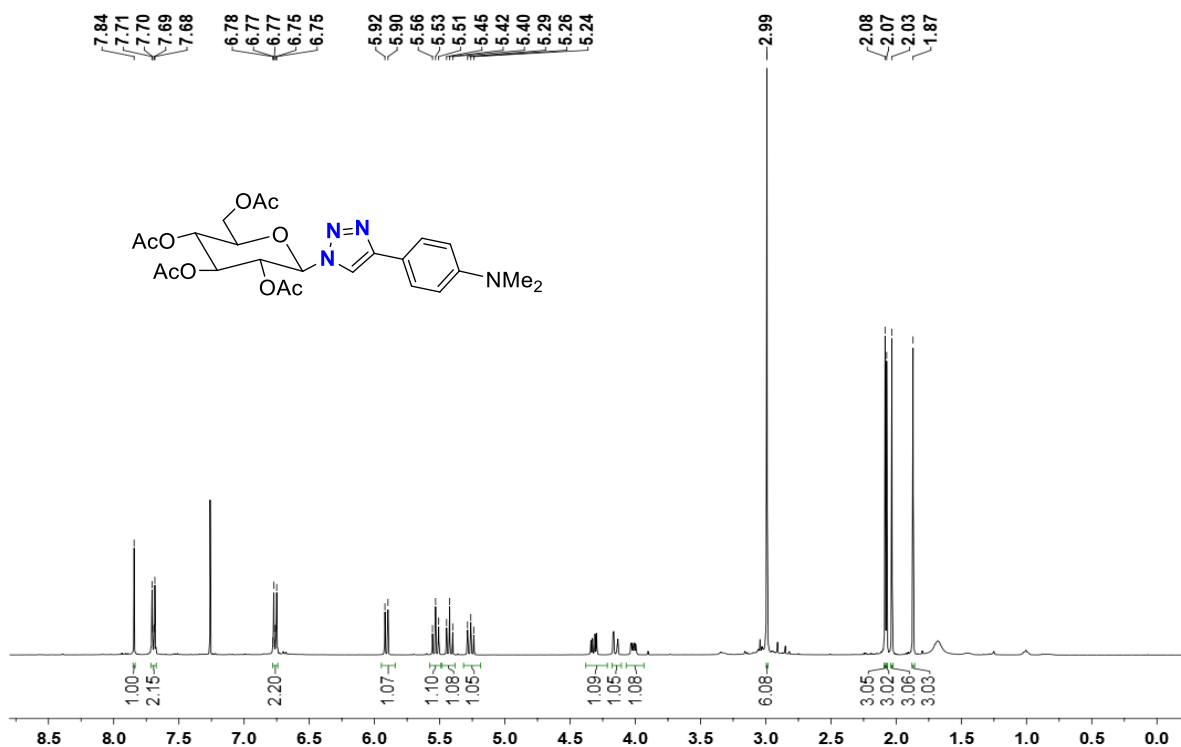

**Figure S15.**  $^1\text{H}$  NMR (400 MHz) spectrum of (2R,3R,4S,5R,6R)-2-(acetoxymethyl)-6-(4-(4-(dimethylamino)phenyl)-1H-1,2,3-triazol-1-yl)tetrahydro-2H-pyran-3,4,5-triyl triacetate (**B3**)  $\text{CDCl}_3$  at r.t.

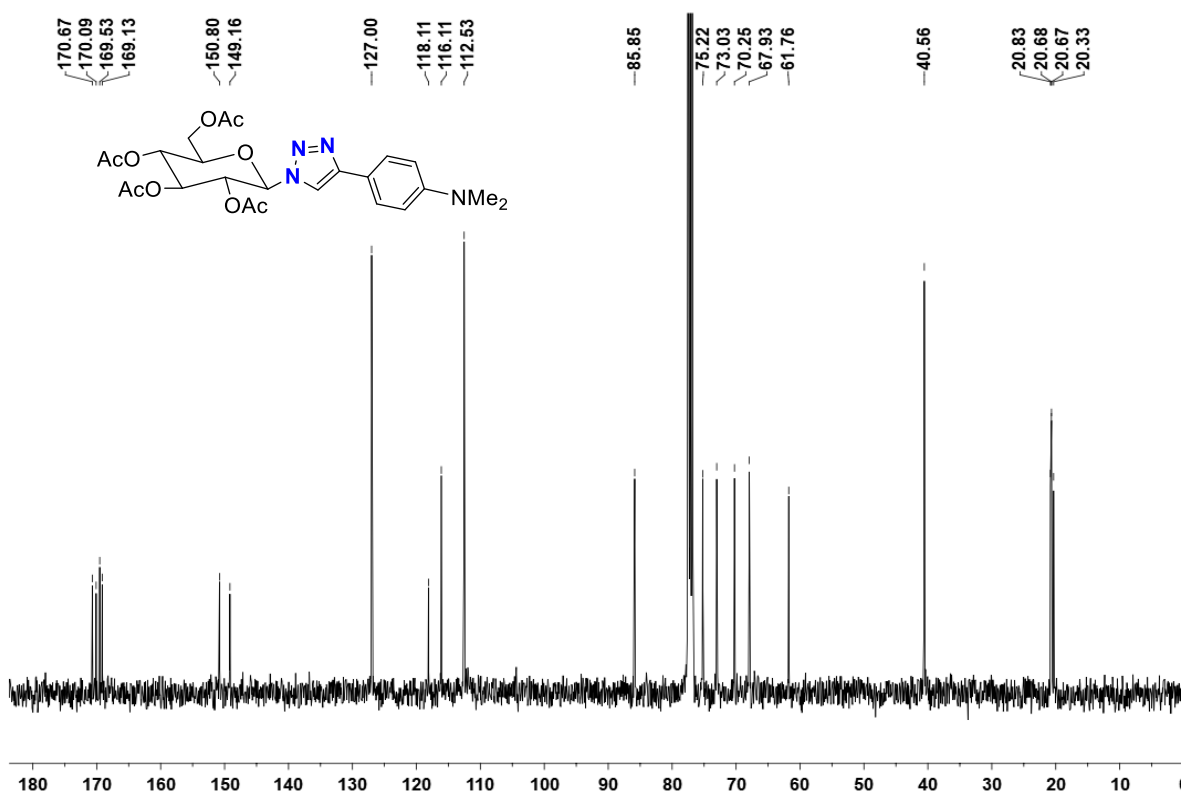

**Figure S16.**  $^{13}\text{C}$  NMR (400 MHz) spectrum of (2R,3R,4S,5R,6R)-2-(acetoxymethyl)-6-(4-(4-(dimethylamino)phenyl)-1H-1,2,3-triazol-1-yl)tetrahydro-2H-pyran-3,4,5-triyl triacetate (**B3**)  $\text{CDCl}_3$  at r.t.

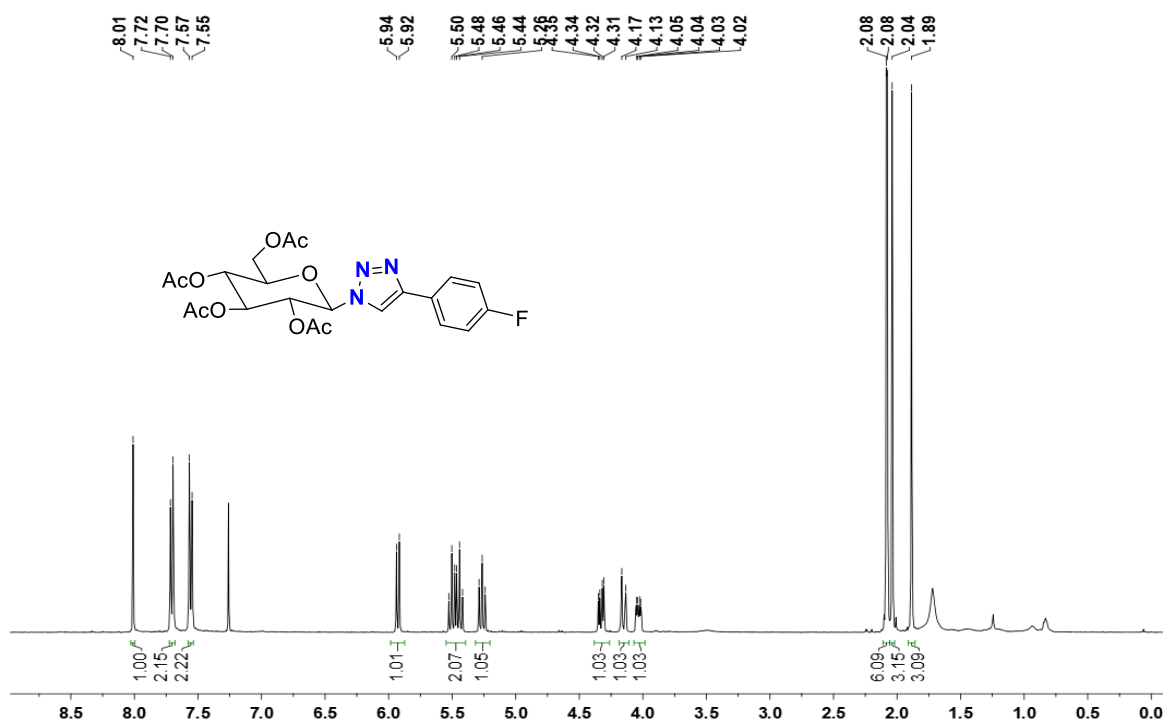

**Figure S17.** <sup>1</sup>H NMR (400 MHz) spectrum of (2R,3R,4S,5R,6R)-2-(acetoxymethyl)-6-(4-(4-fluorophenyl)-1H-1,2,3-triazol-1-yl)tetrahydro-2H-pyran-3,4,5-triyl triacetate (**B4**) CDCl<sub>3</sub> at r.t.

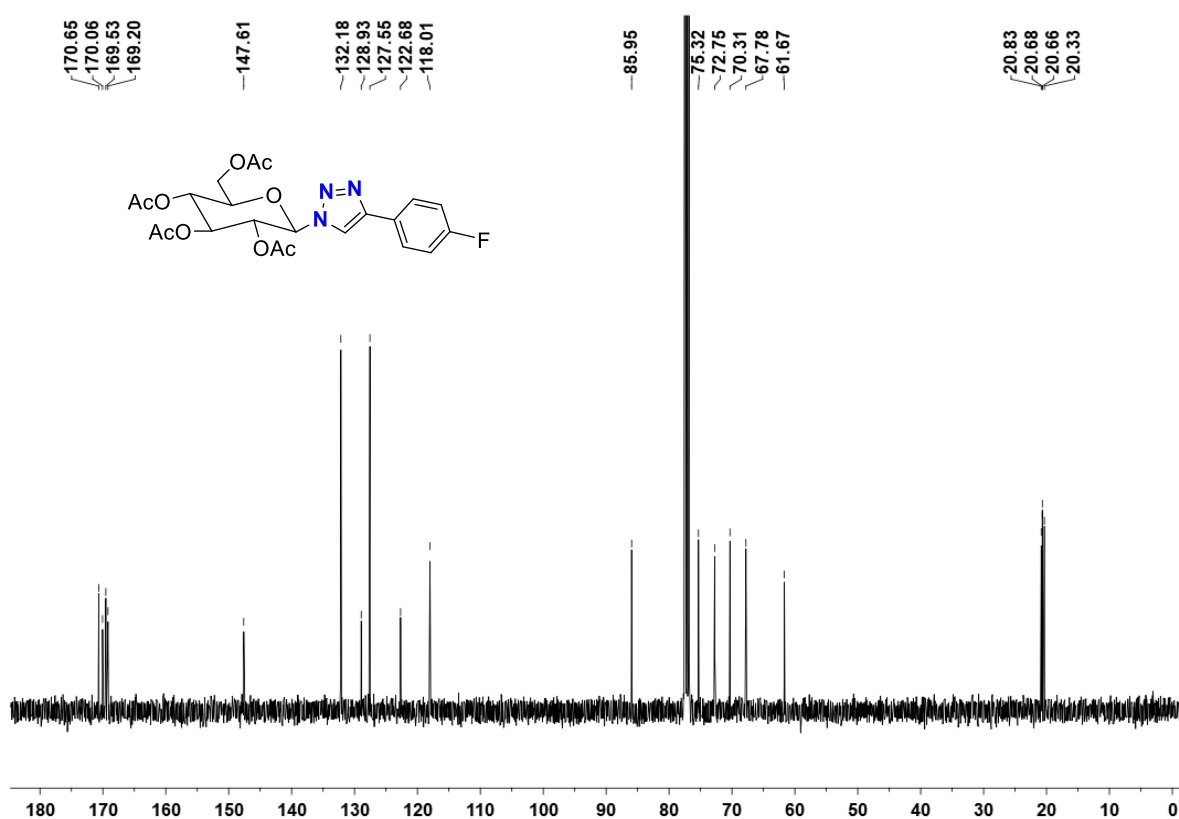

**Figure S18.** <sup>13</sup>C NMR (101 MHz) spectrum of (2R,3R,4S,5R,6R)-2-(acetoxymethyl)-6-(4-(4-fluorophenyl)-1H-1,2,3-triazol-1-yl)tetrahydro-2H-pyran-3,4,5-triyl triacetate (**B4**) in CDCl<sub>3</sub> at r.t.

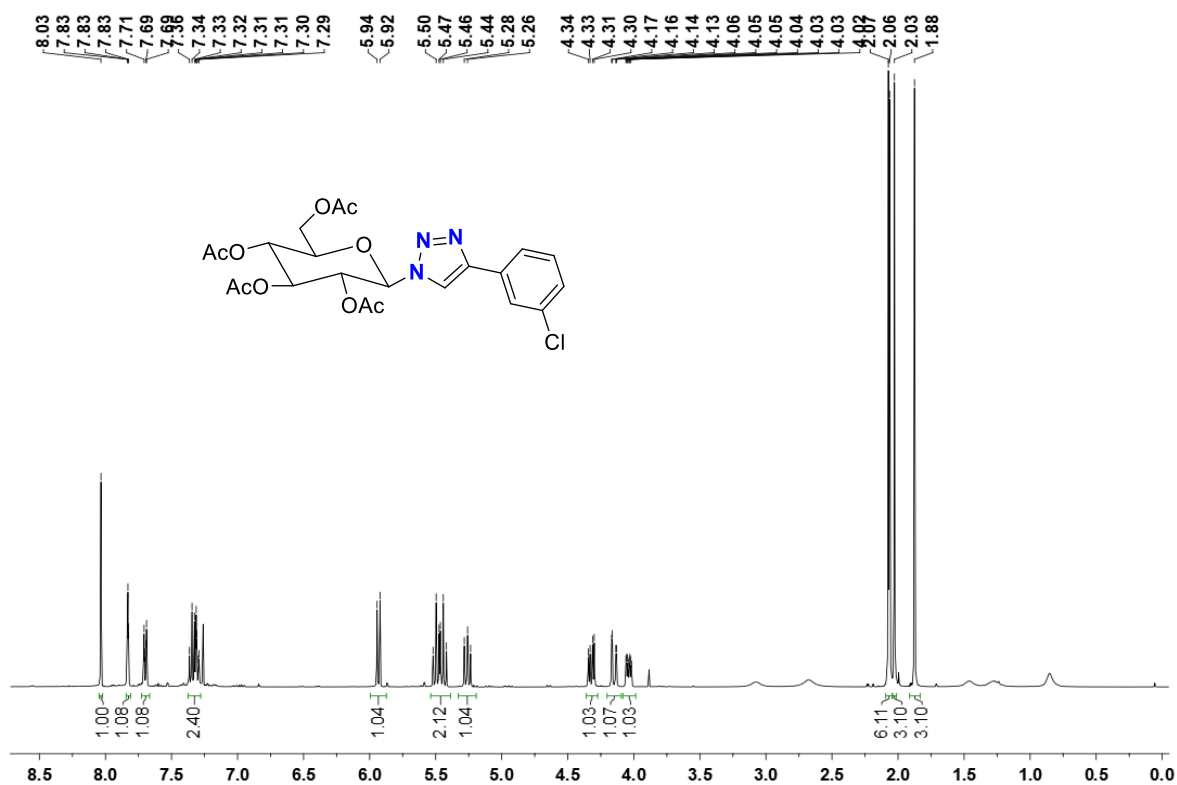

**Figure S19.**  $^1\text{H}$  NMR (400 MHz) spectrum of (2R,3R,4S,5R,6R)-2-(acetoxymethyl)-6-(4-(3-chlorophenyl)-1H-1,2,3-triazol-1-yl)tetrahydro-2H-pyran-3,4,5-triyl triacetate (**B5**)  $\text{CDCl}_3$  at r.t.

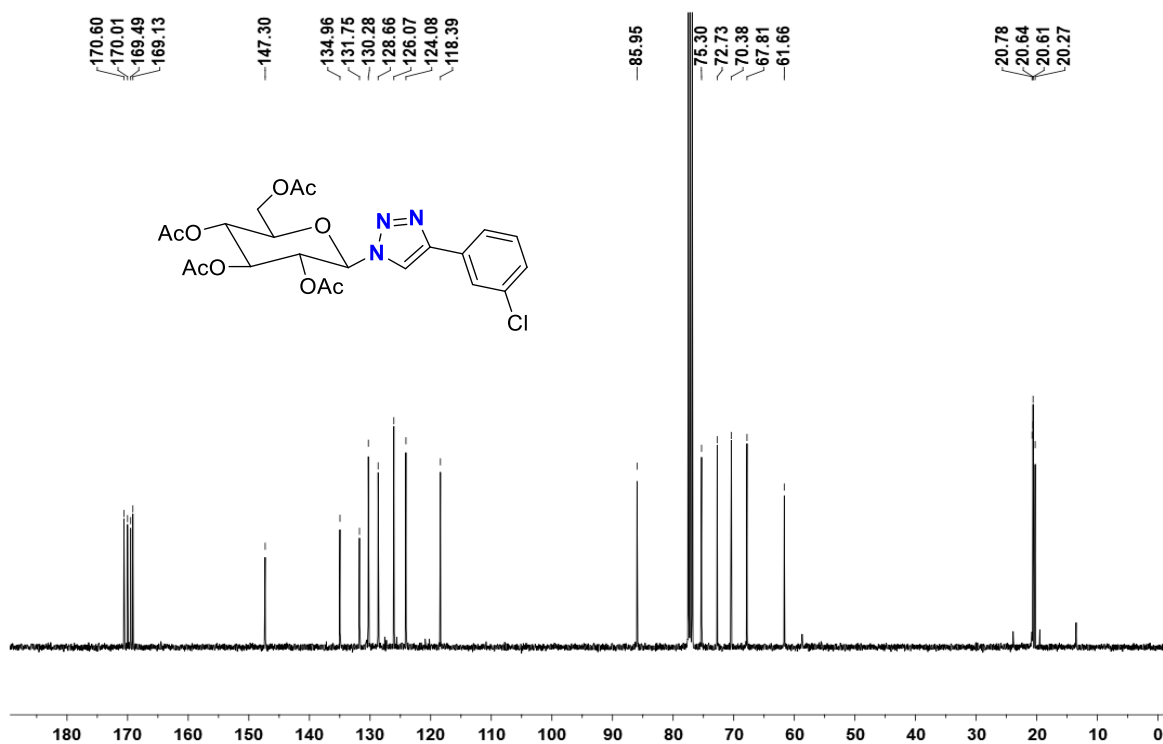

**Figure S20.**  $^{13}\text{C}$  NMR (400 MHz) spectrum of (2R,3R,4S,5R,6R)-2-(acetoxymethyl)-6-(4-(3-chlorophenyl)-1H-1,2,3-triazol-1-yl)tetrahydro-2H-pyran-3,4,5-triyl triacetate (**B5**)  $\text{CDCl}_3$  at r.t.

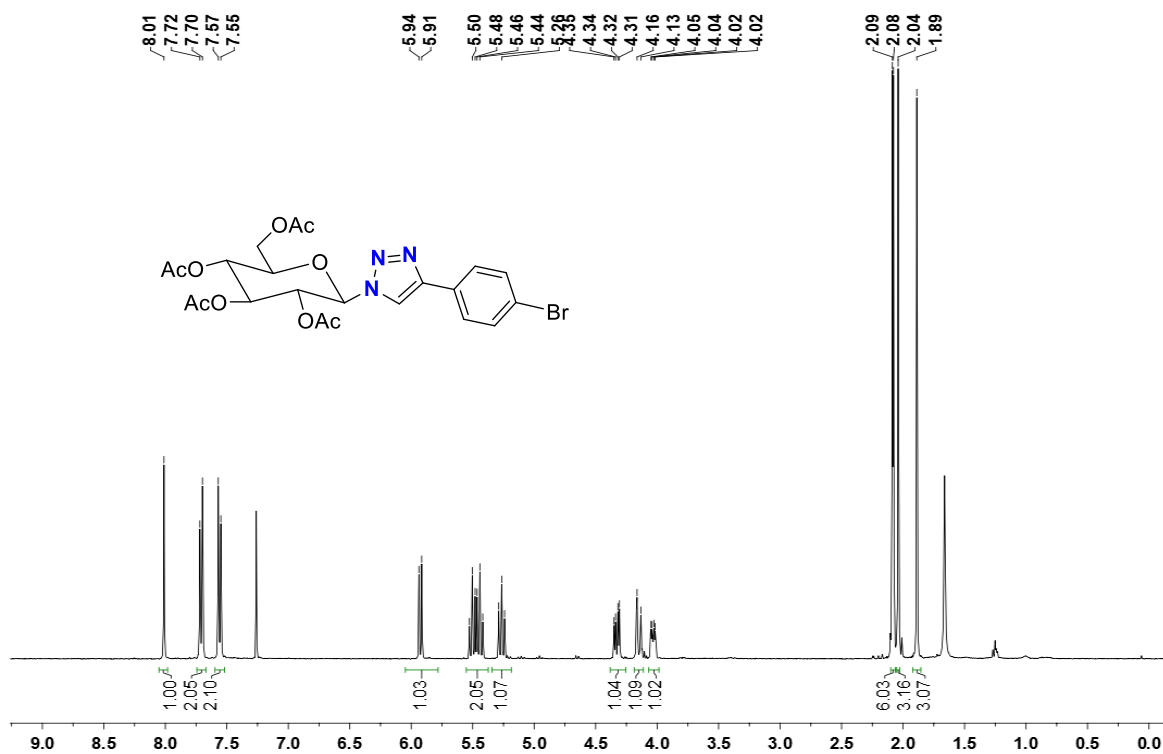

**Figure S21.** <sup>1</sup>H NMR (400 MHz) spectrum of (2R,3R,4S,5R,6R)-2-(acetoxymethyl)-6-(4-(4-bromophenyl)-1H-1,2,3-triazol-1-yl)tetrahydro-2H-pyran-3,4,5-triyl triacetate (**B6**) CDCl<sub>3</sub> at r.t.

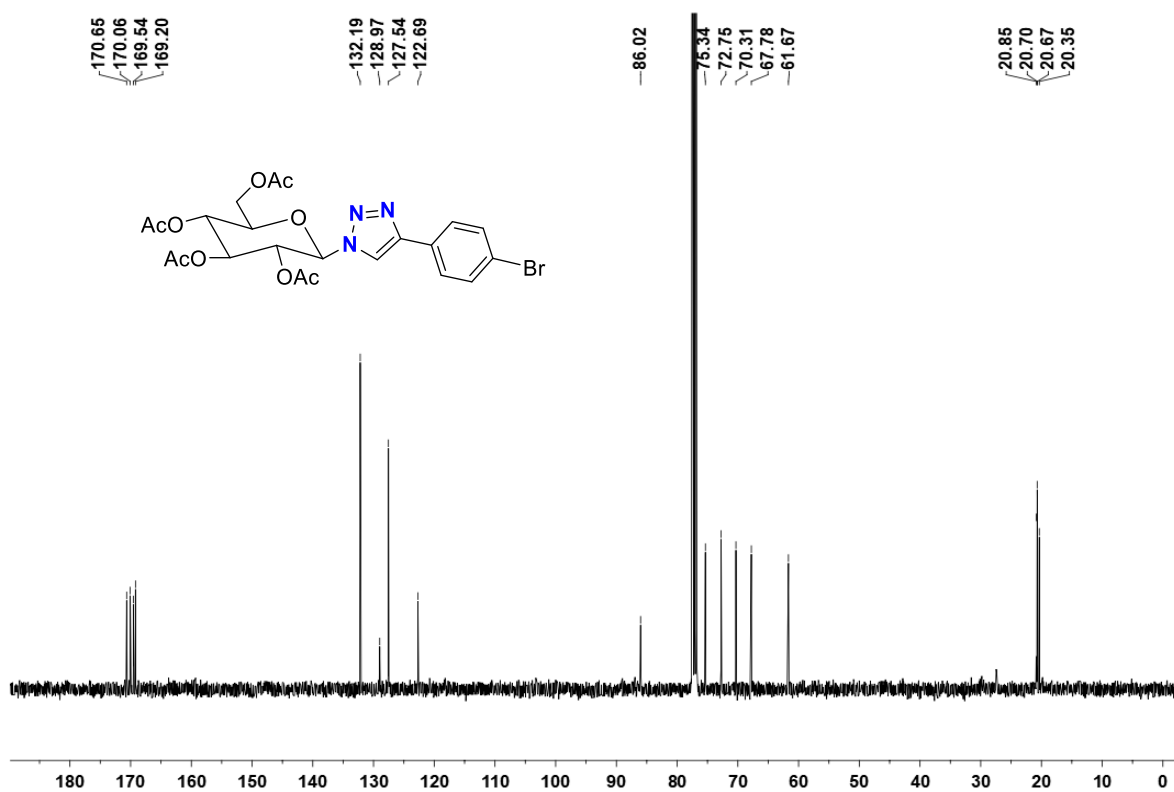

**Figure S22.** <sup>13</sup>C NMR (101 MHz) spectrum of (2R,3R,4S,5R,6R)-2-(acetoxymethyl)-6-(4-(4-bromophenyl)-1H-1,2,3-triazol-1-yl)tetrahydro-2H-pyran-3,4,5-triyl triacetate (**B6**) in CDCl<sub>3</sub> at r.t.

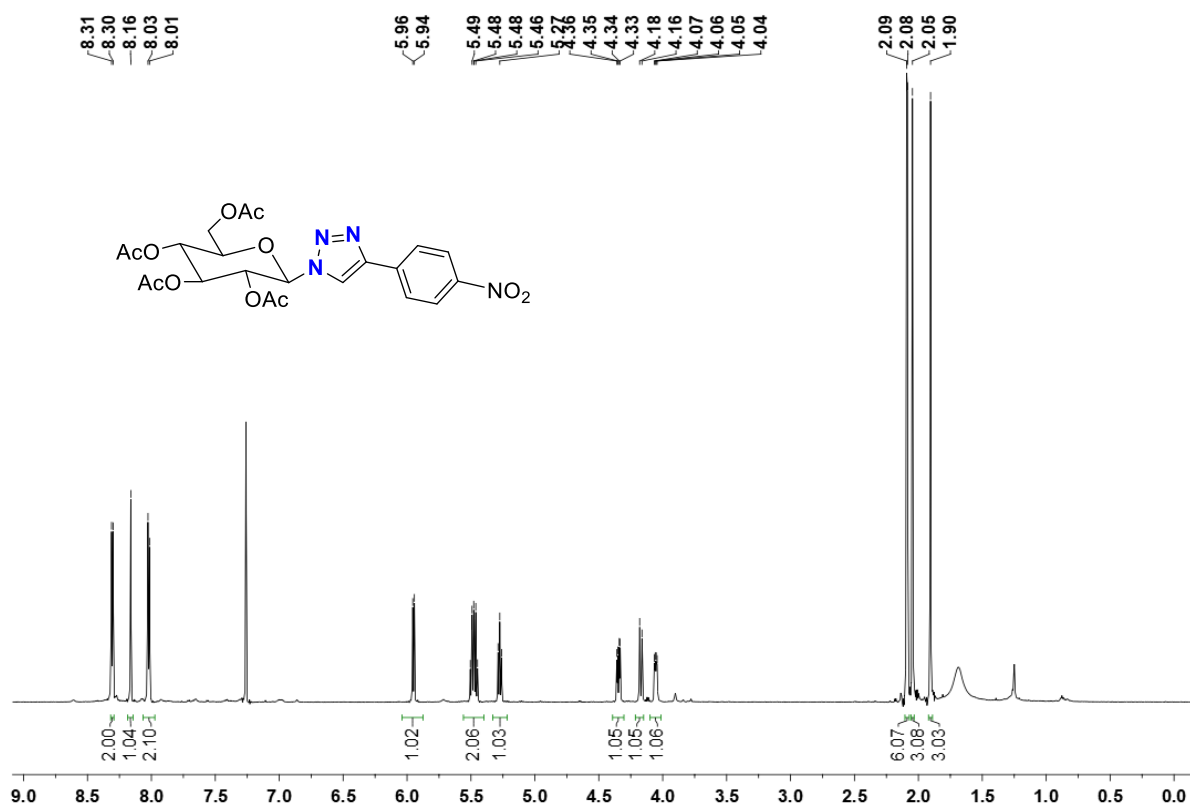

**Figure S23.** <sup>1</sup>H NMR (400 MHz) spectrum of (2R,3R,4S,5R,6R)-2-(acetoxymethyl)-6-(4-(4-nitrophenyl)-1H-1,2,3-triazol-1-yl)tetrahydro-2H-pyran-3,4,5-triyl triacetate (**B7**) in CDCl<sub>3</sub> at r.t.

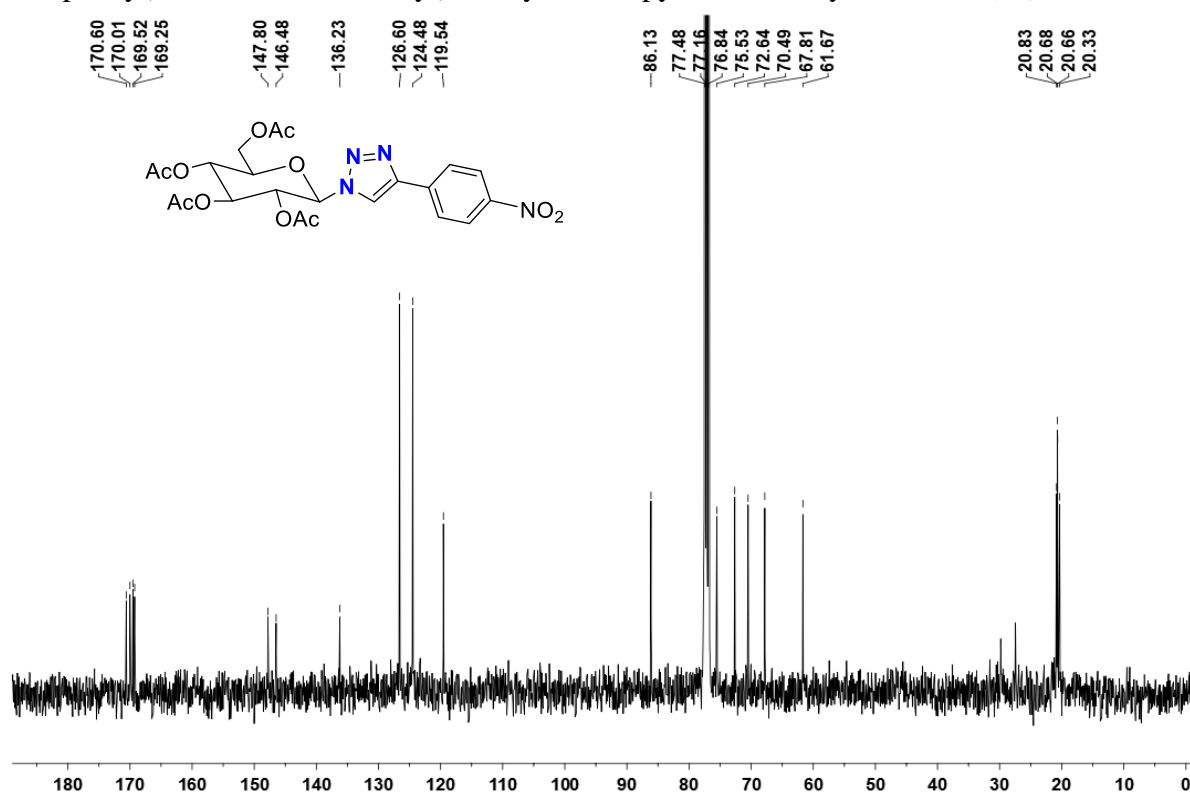

**Figure S24.** <sup>13</sup>C NMR (101 MHz) spectrum of (2R,3R,4S,5R,6R)-2-(acetoxymethyl)-6-(4-(4-nitrophenyl)-1H-1,2,3-triazol-1-yl)tetrahydro-2H-pyran-3,4,5-triyl triacetate (**B7**) in CDCl<sub>3</sub> at r.t.

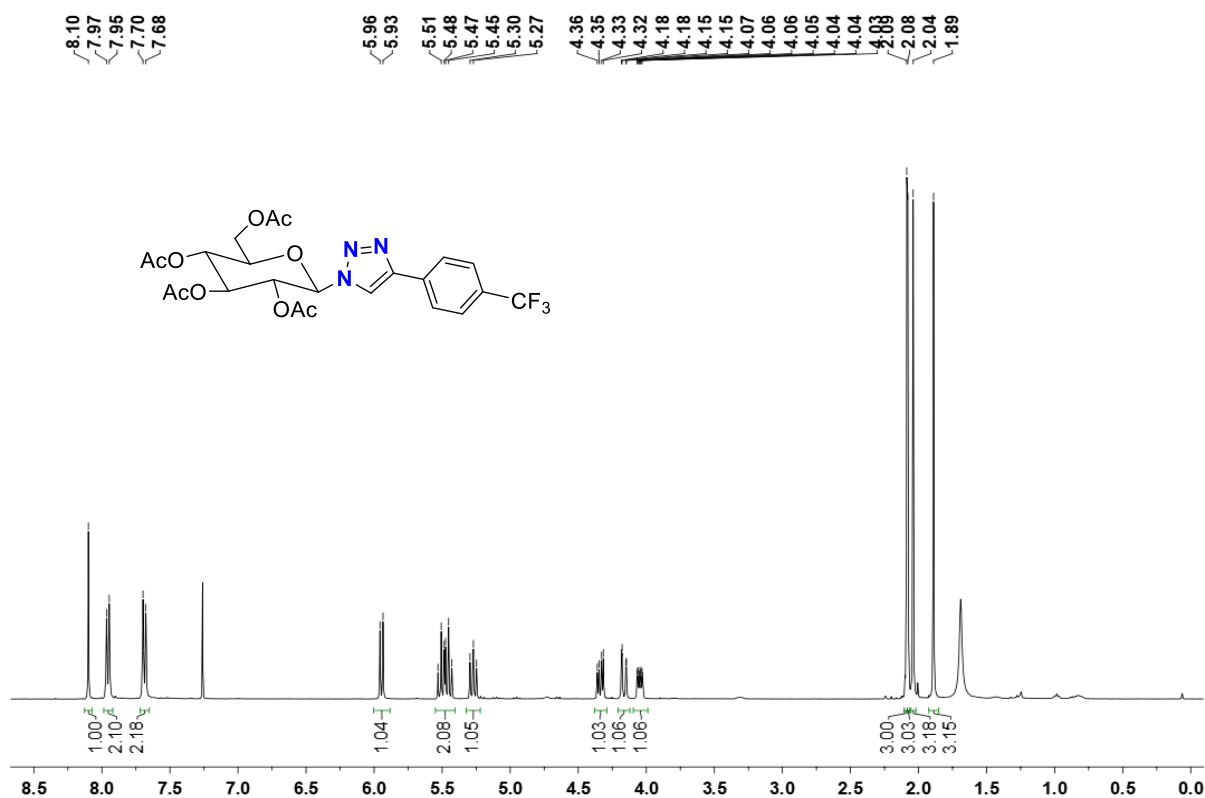

**Figure S25.** <sup>1</sup>H NMR (400 MHz) spectrum of (2R,3R,4S,5R,6R)-2-(acetoxymethyl)-6-(4-(4-(trifluoromethyl)phenyl)-1H-1,2,3-triazol-1-yl)tetrahydro-2H-pyran-3,4,5-triyl triacetate (**B8**) CDCl<sub>3</sub> at r.t.

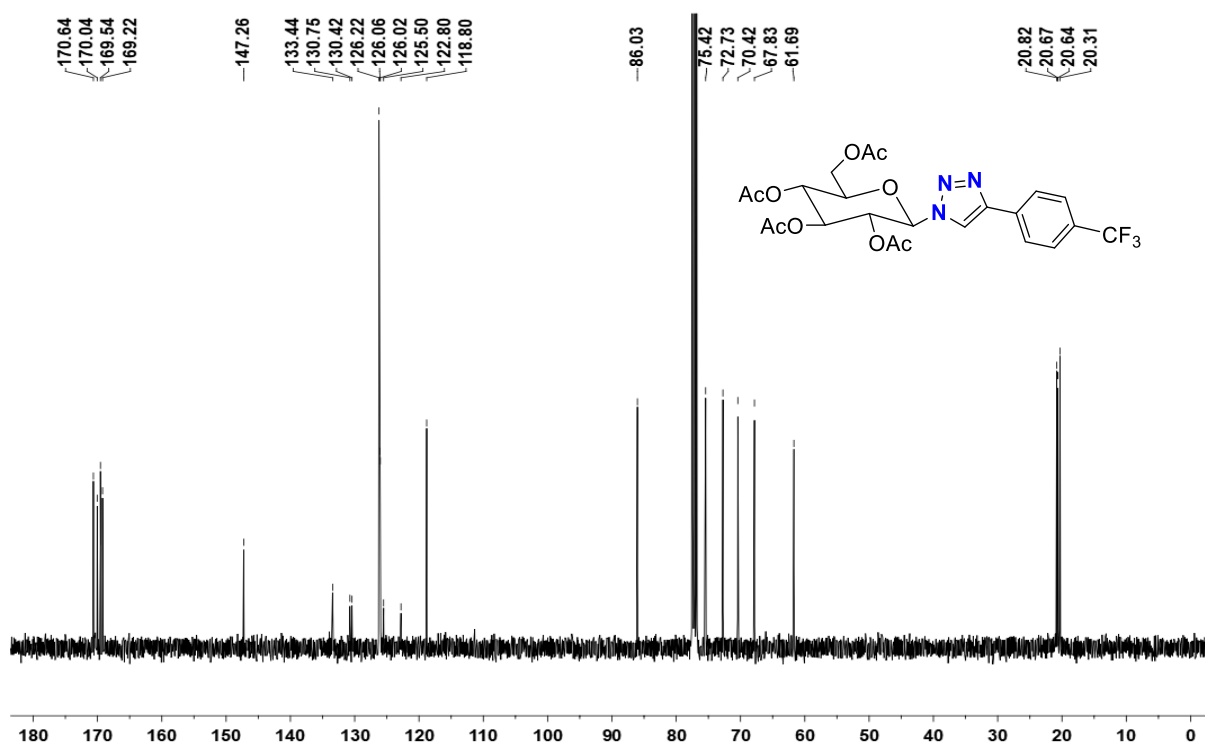

**Figure S26.** <sup>13</sup>C NMR (400 MHz) spectrum of (2R,3R,4S,5R,6R)-2-(acetoxymethyl)-6-(4-(4-(trifluoromethyl)phenyl)-1H-1,2,3-triazol-1-yl)tetrahydro-2H-pyran-3,4,5-triyl triacetate (**B8**) CDCl<sub>3</sub> at r.t.

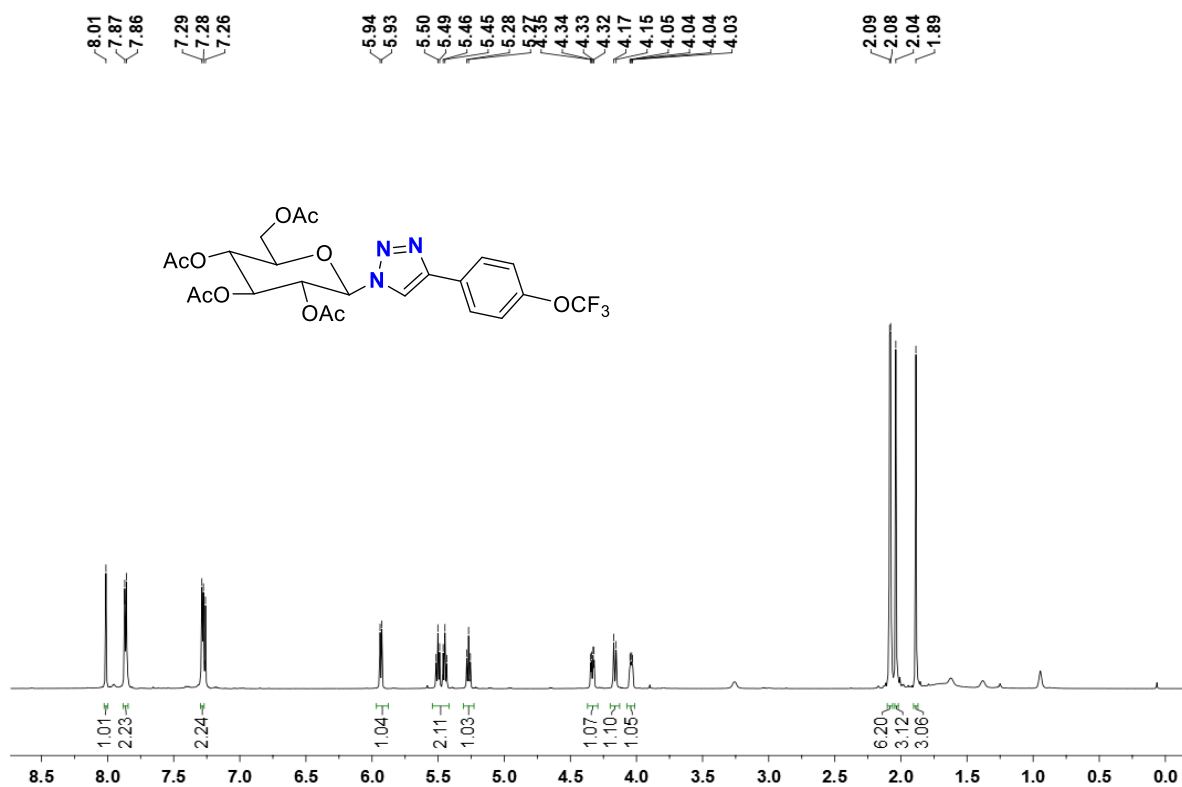

**Figure S27.** <sup>1</sup>H NMR (400 MHz) spectrum of (2R,3R,4S,5R,6R)-2-(acetoxymethyl)-6-(4-(4-(trifluoromethoxy)phenyl)-1H-1,2,3-triazol-1-yl)tetrahydro-2H-pyran-3,4,5-triyl triacetate (B9) in CDCl<sub>3</sub> at r.t.

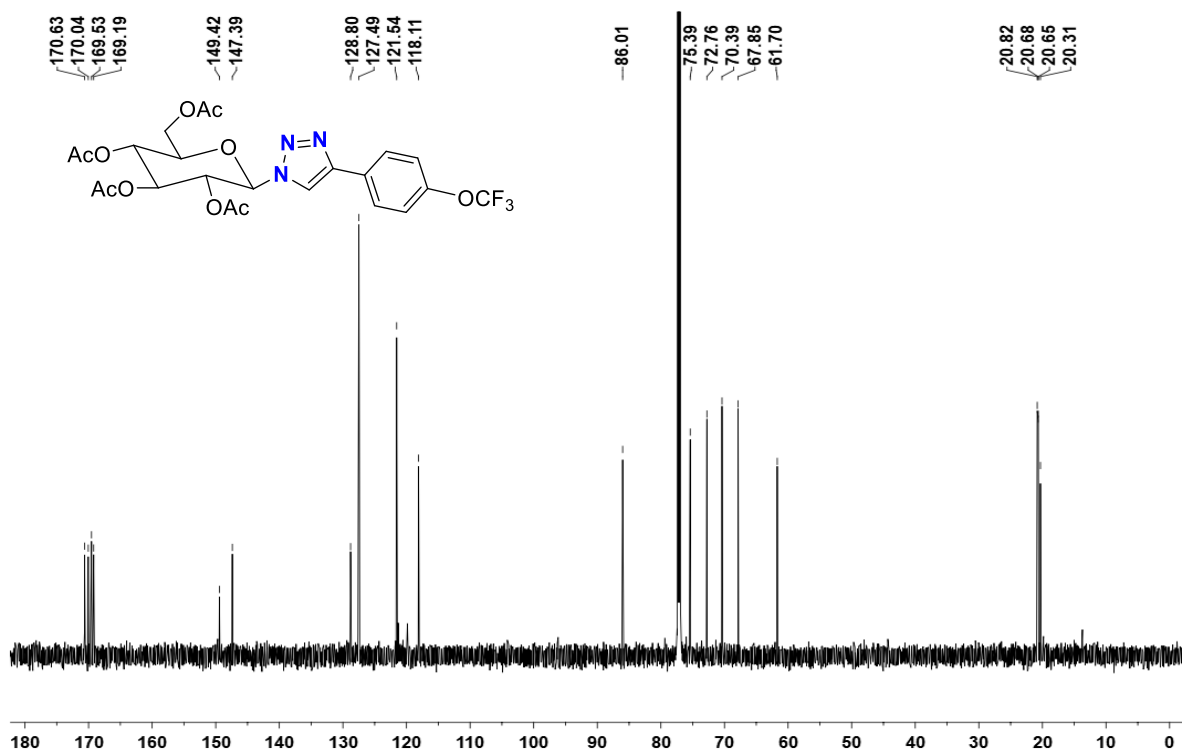

**Figure S28.** <sup>13</sup>C NMR (101 MHz) spectrum of (2R,3R,4S,5R,6R)-2-(acetoxymethyl)-6-(4-(4-(trifluoromethoxy)phenyl)-1H-1,2,3-triazol-1-yl)tetrahydro-2H-pyran-3,4,5-triyl triacetate (B9) in CDCl<sub>3</sub> at r.t.

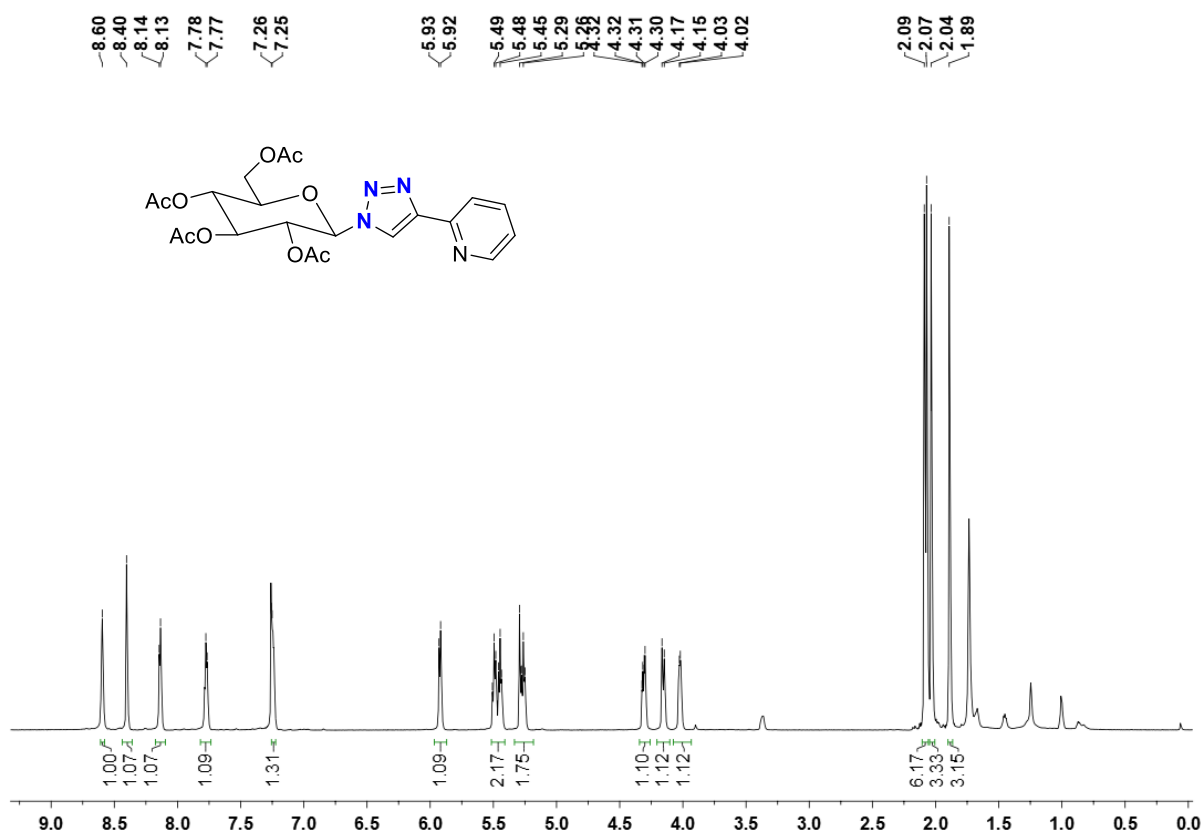

**Figure S29.** <sup>1</sup>H NMR (400 MHz) spectrum of (2R,3R,4S,5R,6R)-2-(acetoxymethyl)-6-(4-(pyridin-2-yl)-1H-1,2,3-triazol-1-yl)tetrahydro-2H-pyran-3,4,5-triyl triacetate (**B10**) CDCl<sub>3</sub> at r.t.

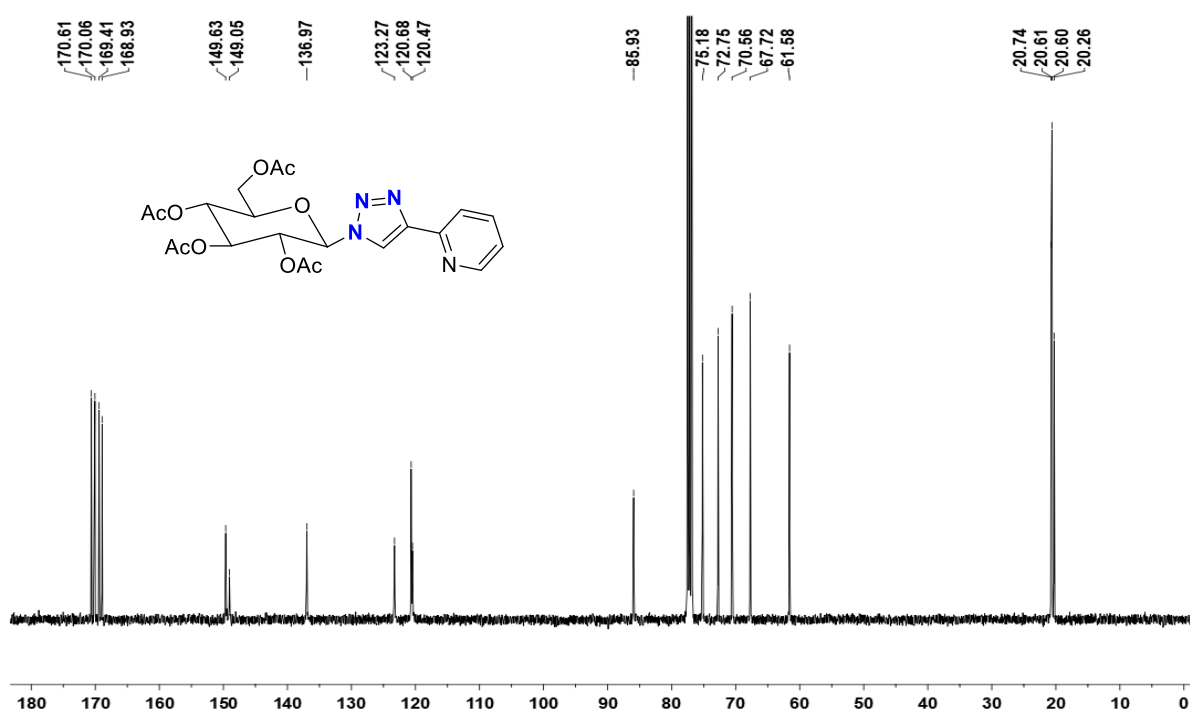

**Figure S30.** <sup>13</sup>C NMR (101 MHz) spectrum of (2R,3R,4S,5R,6R)-2-(acetoxymethyl)-6-(4-(pyridin-2-yl)-1H-1,2,3-triazol-1-yl)tetrahydro-2H-pyran-3,4,5-triyl triacetate (**B10**) in CDCl<sub>3</sub> at r.t.



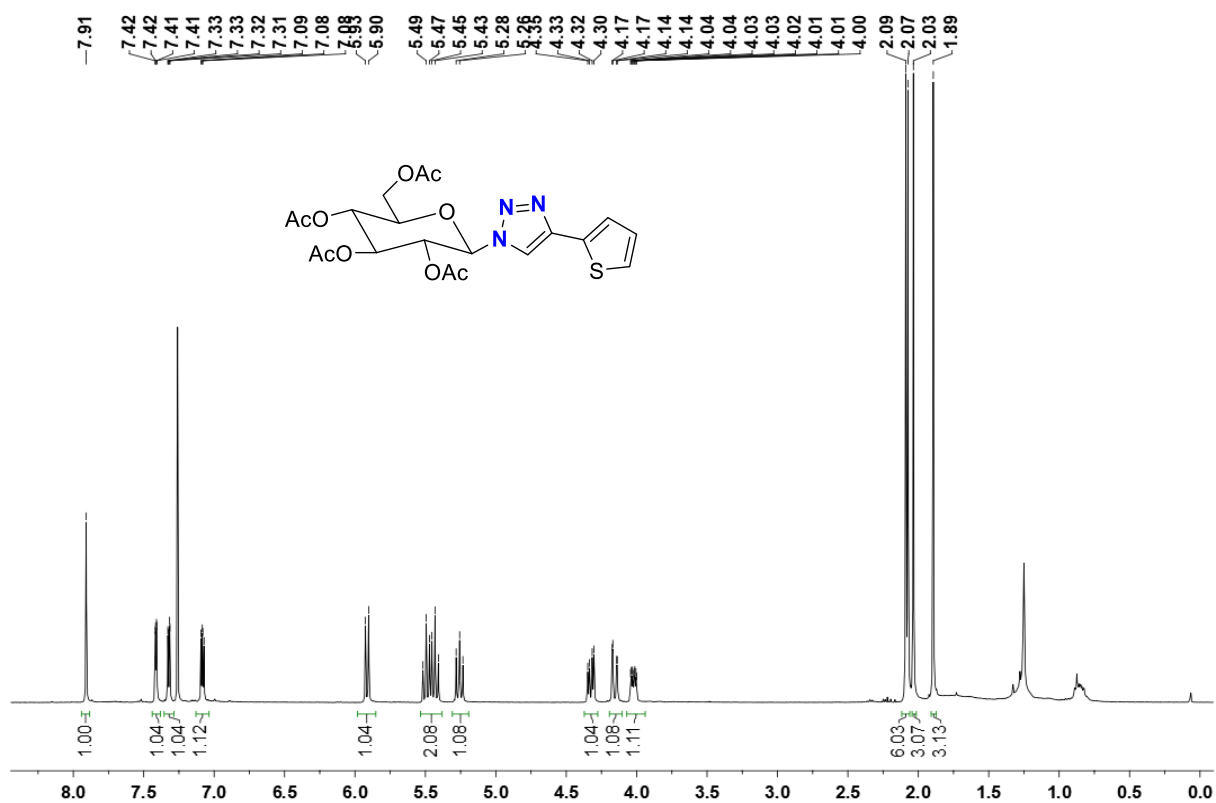

**Figure S31.**  $^1\text{H}$  NMR (400 MHz) spectrum of (2R,3R,4S,5R,6R)-2-(acetoxymethyl)-6-(4-(thiophen-2-yl)-1H-1,2,3-triazol-1-yl)tetrahydro-2H-pyran-3,4,5-triyl triacetate (**B11**)  $\text{CDCl}_3$  at r.t.

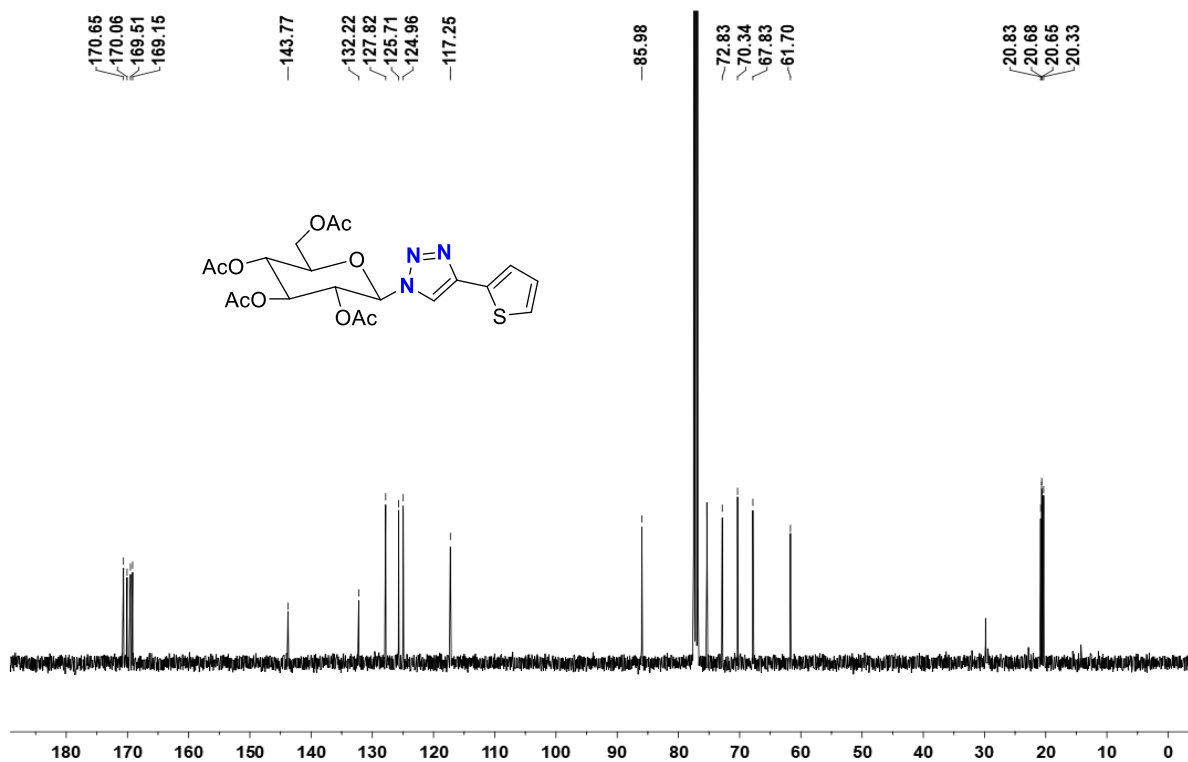

**Figure S32.**  $^{13}\text{C}$  NMR (400 MHz) spectrum of (2R,3R,4S,5R,6R)-2-(acetoxymethyl)-6-(4-(thiophen-2-yl)-1H-1,2,3-triazol-1-yl)tetrahydro-2H-pyran-3,4,5-triyl triacetate (**B11**)  $\text{CDCl}_3$  at r.t.

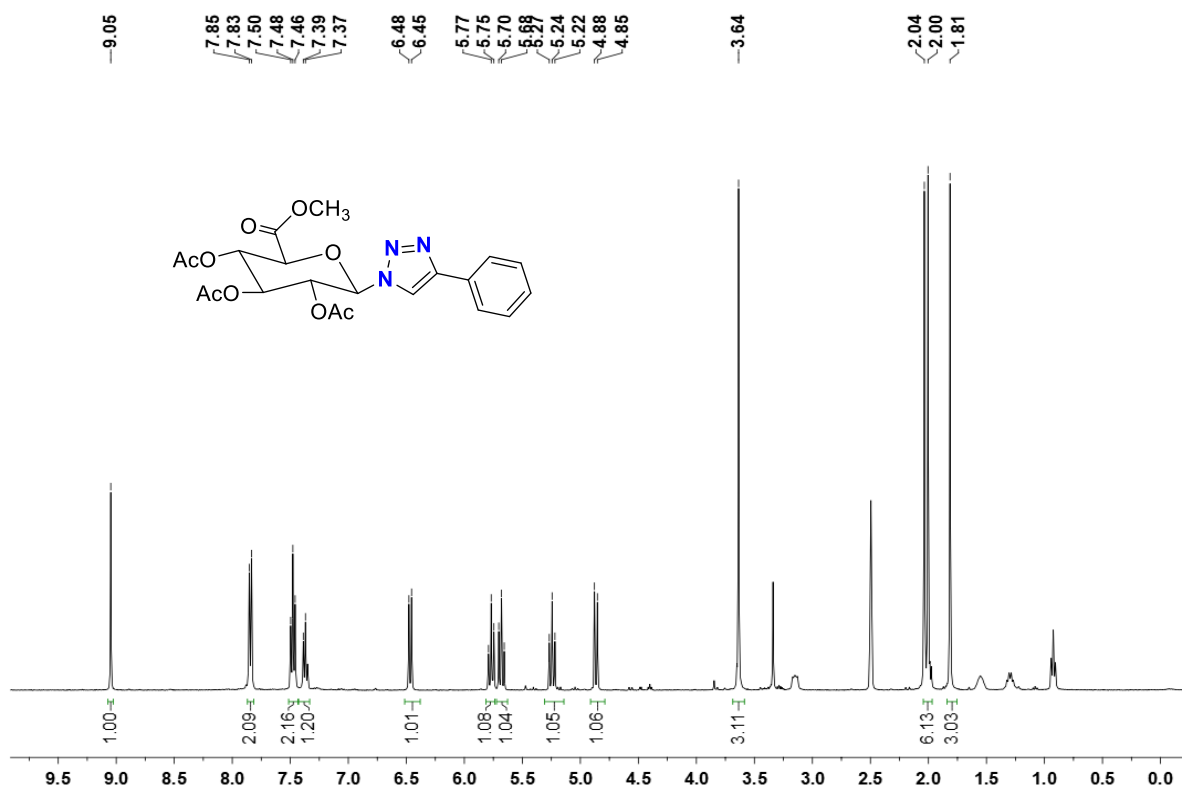

**Figure S33.**  $^1\text{H}$  NMR (400 MHz) spectrum of (2S,3S,4S,5R,6R)-2-(methoxycarbonyl)-6-(4-phenyl-1H-1,2,3-triazol-1-yl)tetrahydro-2H-pyran-3,4,5-triyl triacetate (**C1**) DMSO at r.t.

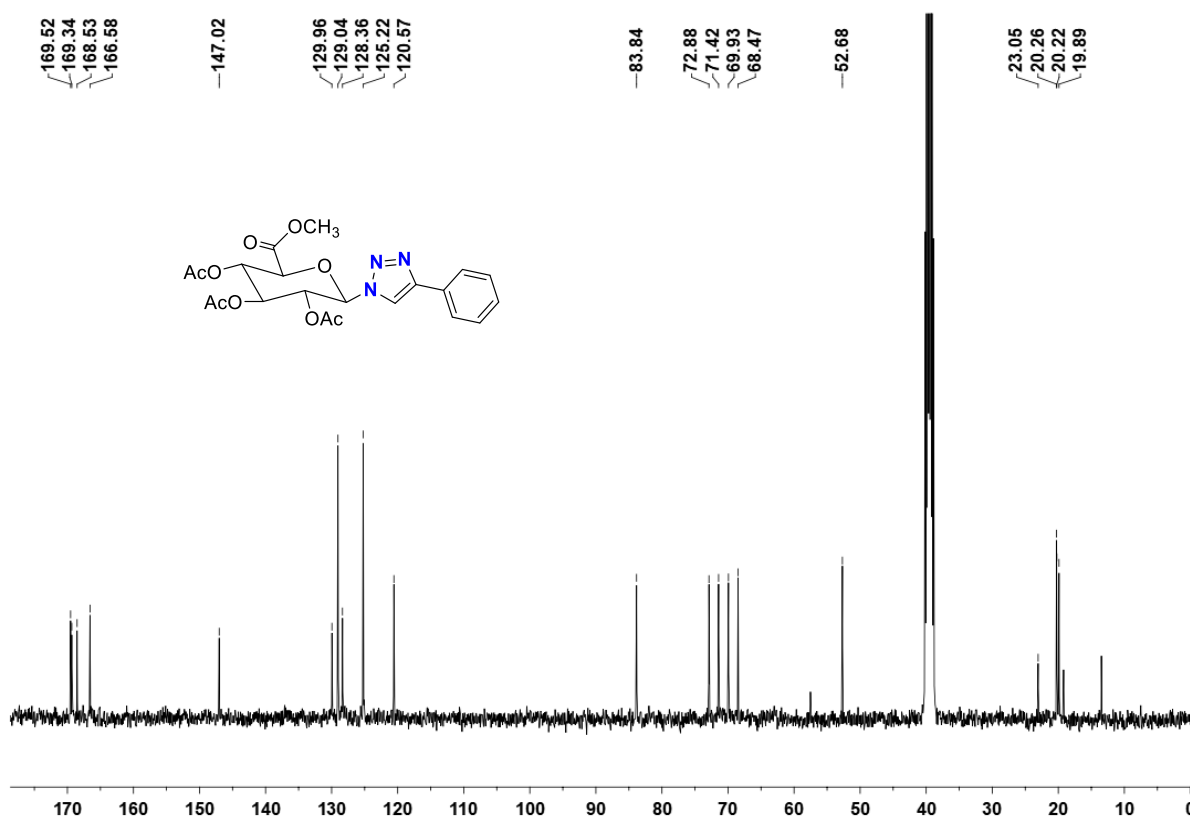

**Figure S34.**  $^{13}\text{C}$  NMR (101 MHz) spectrum of (2S,3S,4S,5R,6R)-2-(methoxycarbonyl)-6-(4-phenyl-1H-1,2,3-triazol-1-yl)tetrahydro-2H-pyran-3,4,5-triyl triacetate (**C1**) in DMSO at r.t.

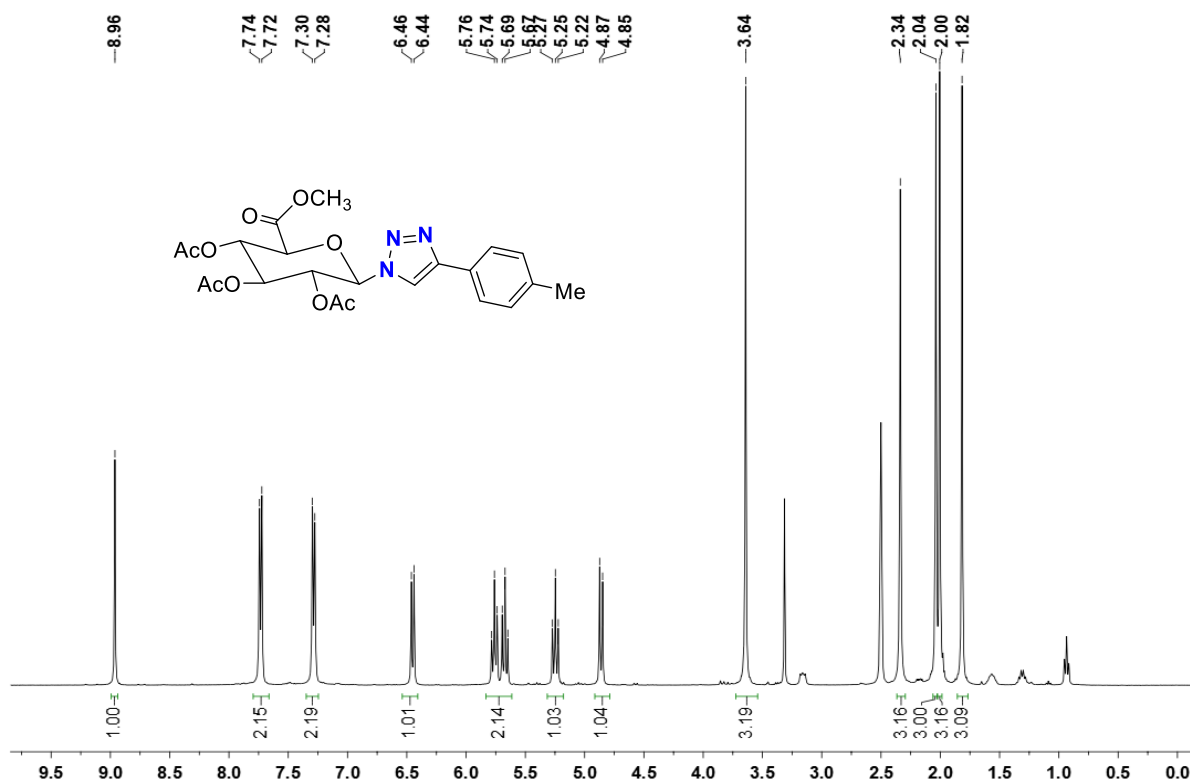

**Figure S35.** <sup>1</sup>H NMR (400 MHz) spectrum of (2S,3S,4S,5R,6R)-2-(methoxycarbonyl)-6-(4-(p-tolyl)-1H-1,2,3-triazol-1-yl)tetrahydro-2H-pyran-3,4,5-triyl triacetate (C<sub>2</sub>) in DMSO at r.t.

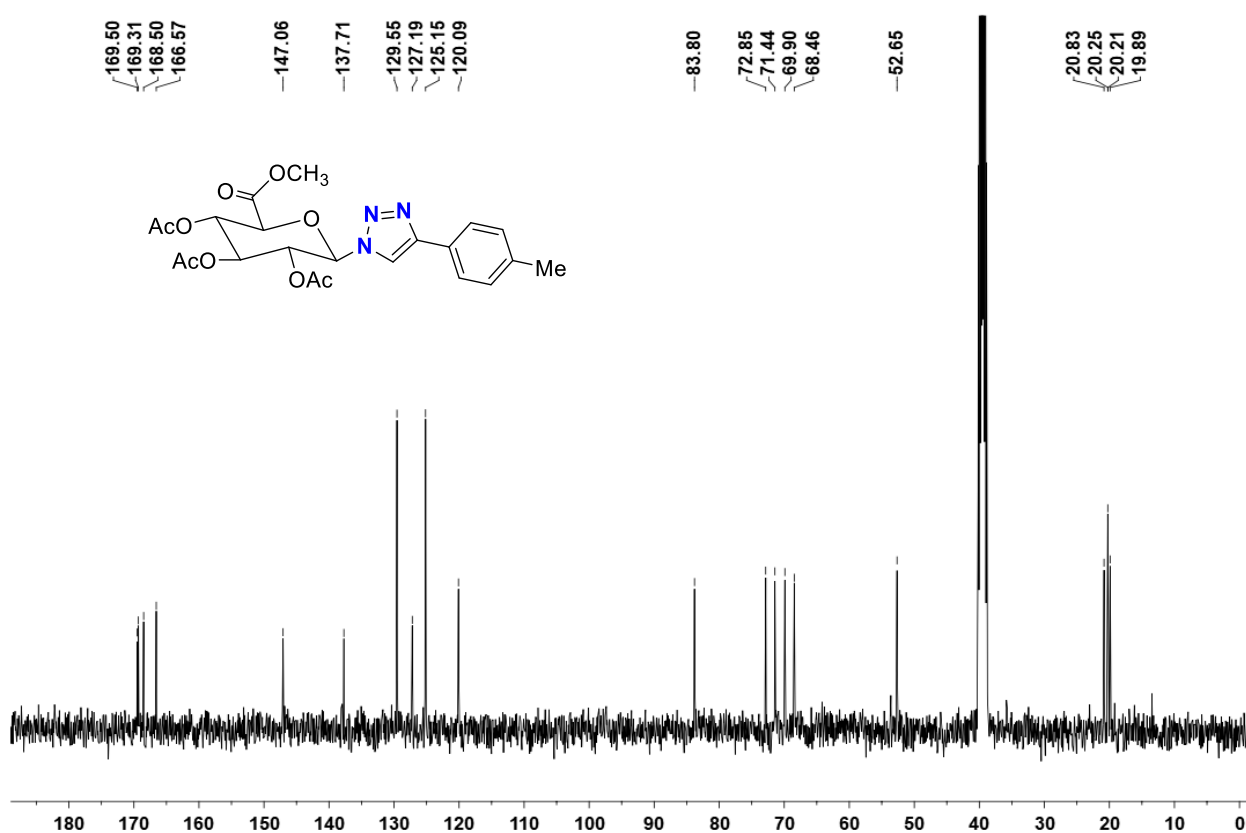

**Figure S36.** <sup>13</sup>C NMR (101 MHz) spectrum of (2S,3S,4S,5R,6R)-2-(methoxycarbonyl)-6-(4-(p-tolyl)-1H-1,2,3-triazol-1-yl)tetrahydro-2H-pyran-3,4,5-triyl triacetate (C<sub>2</sub>) in DMSO at r.t.

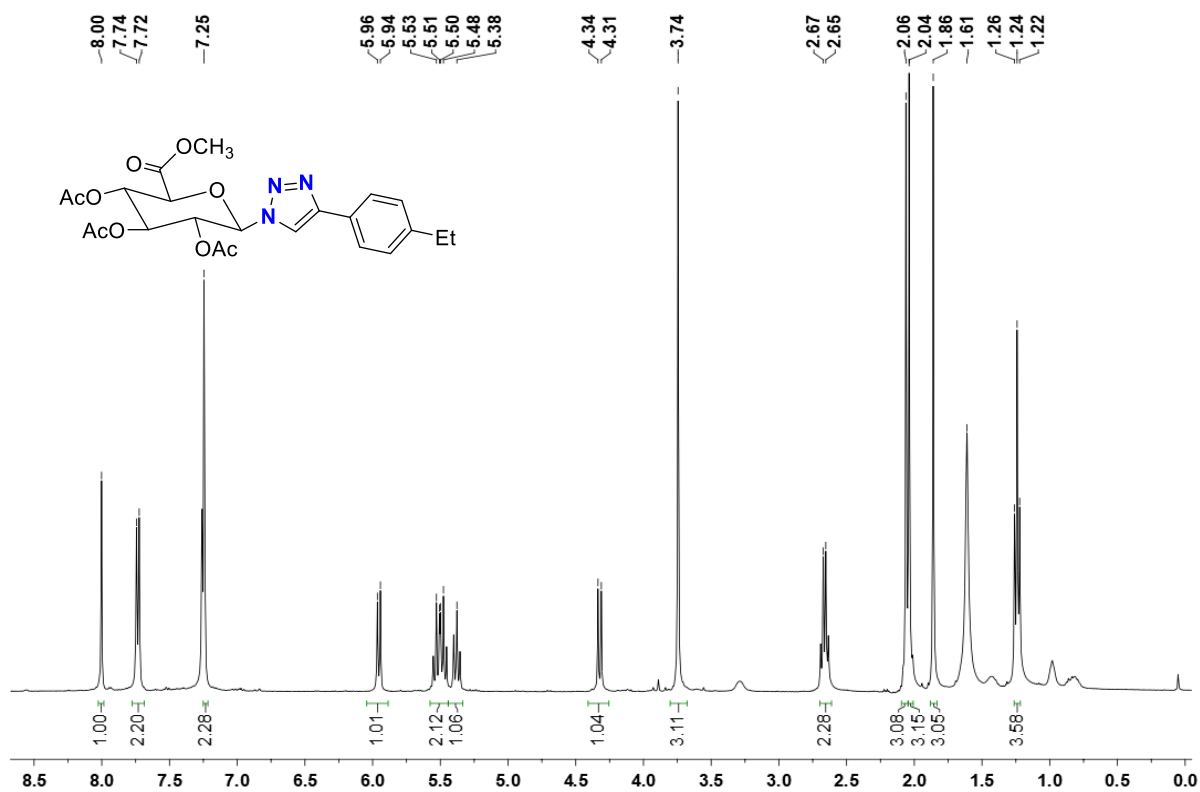

**Figure S37.**  $^1\text{H}$  NMR (400 MHz) spectrum of (2R,3R,4S,5S,6S)-2-(4-(4-ethylphenyl)-1H-1,2,3-triazol-1-yl)-6-(methoxycarbonyl)tetrahydro-2H-pyran-3,4,5-triyl triacetate (**C3**)  $\text{CDCl}_3$  at r.t.

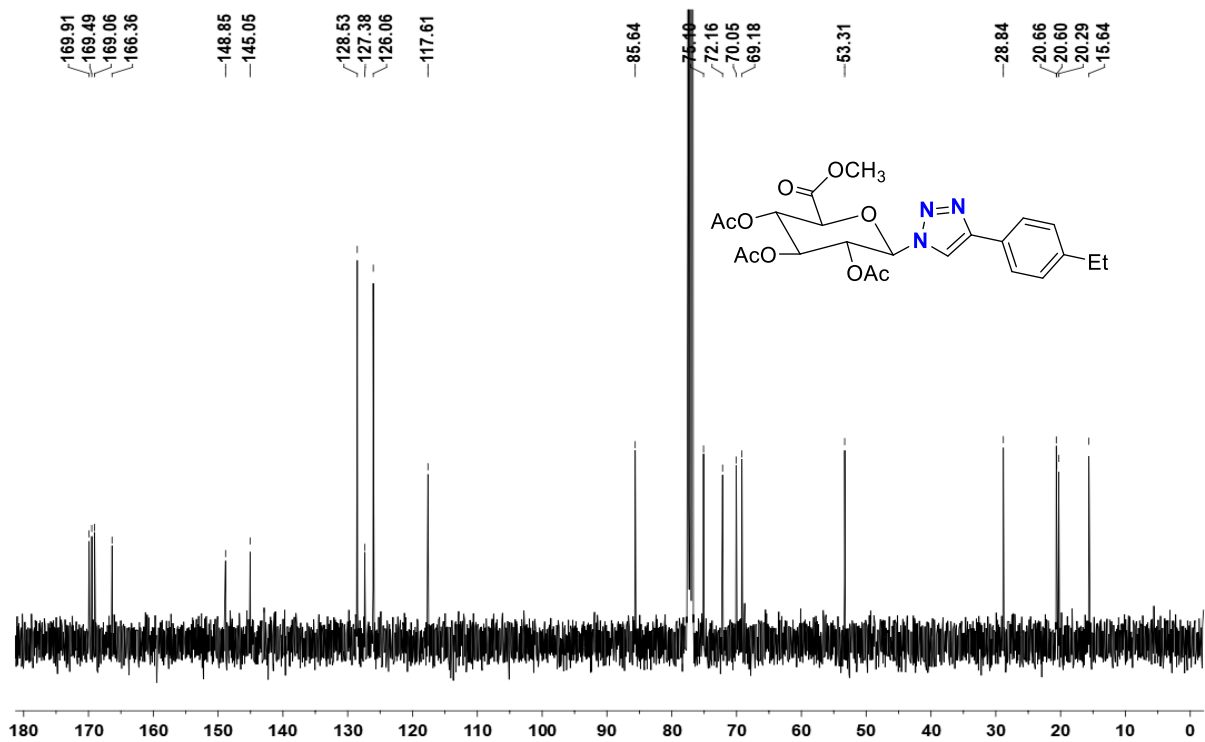

**Figure S38.**  $^{13}\text{C}$  NMR (400 MHz) spectrum of (2R,3R,4S,5S,6S)-2-(4-(4-ethylphenyl)-1H-1,2,3-triazol-1-yl)-6-(methoxycarbonyl)tetrahydro-2H-pyran-3,4,5-triyl triacetate (**C3**)  $\text{CDCl}_3$  at r.t.

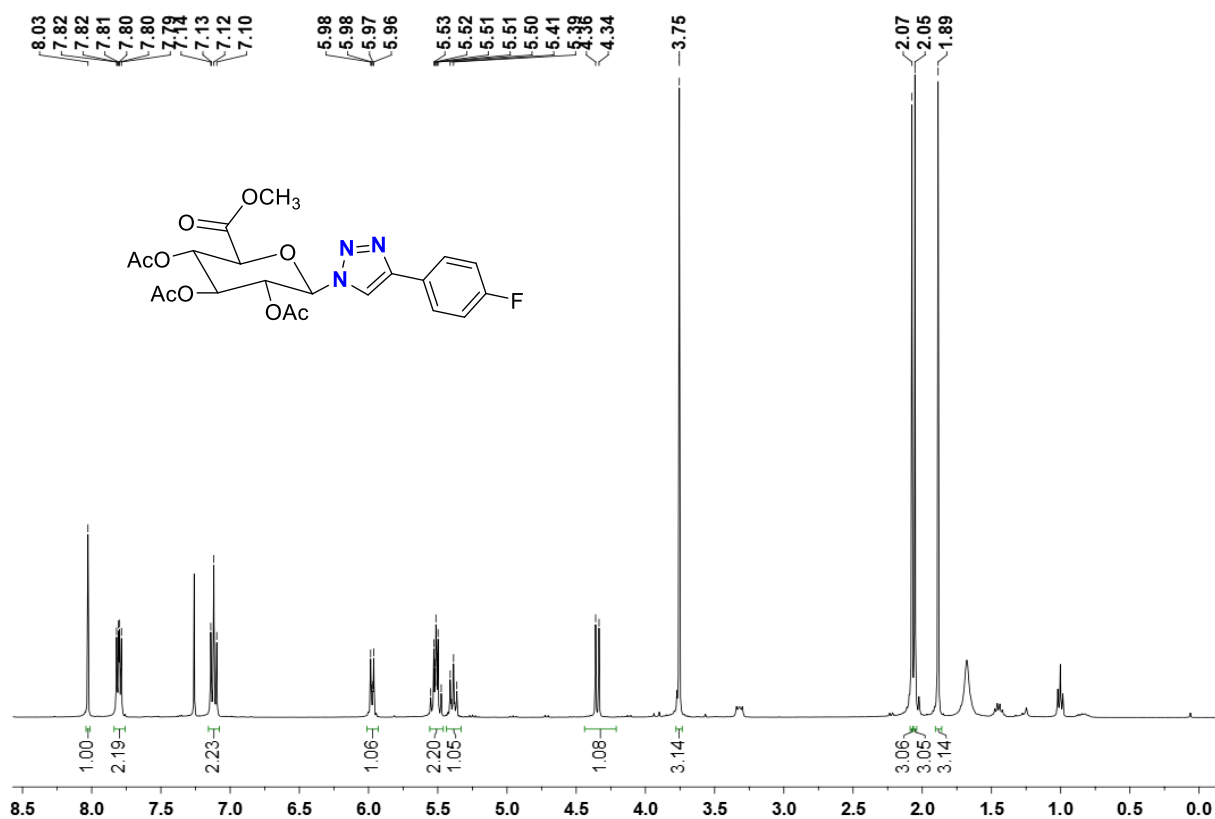

**Figure S39.**  $^1\text{H}$  NMR (400 MHz) spectrum of (2R,3R,4S,5S,6S)-2-(4-(4-fluorophenyl)-1H-1,2,3-triazol-1-yl)-6-(methoxycarbonyl)tetrahydro-2H-pyran-3,4,5-triyl triacetate (**C4**)  $\text{CDCl}_3$  at r.t.

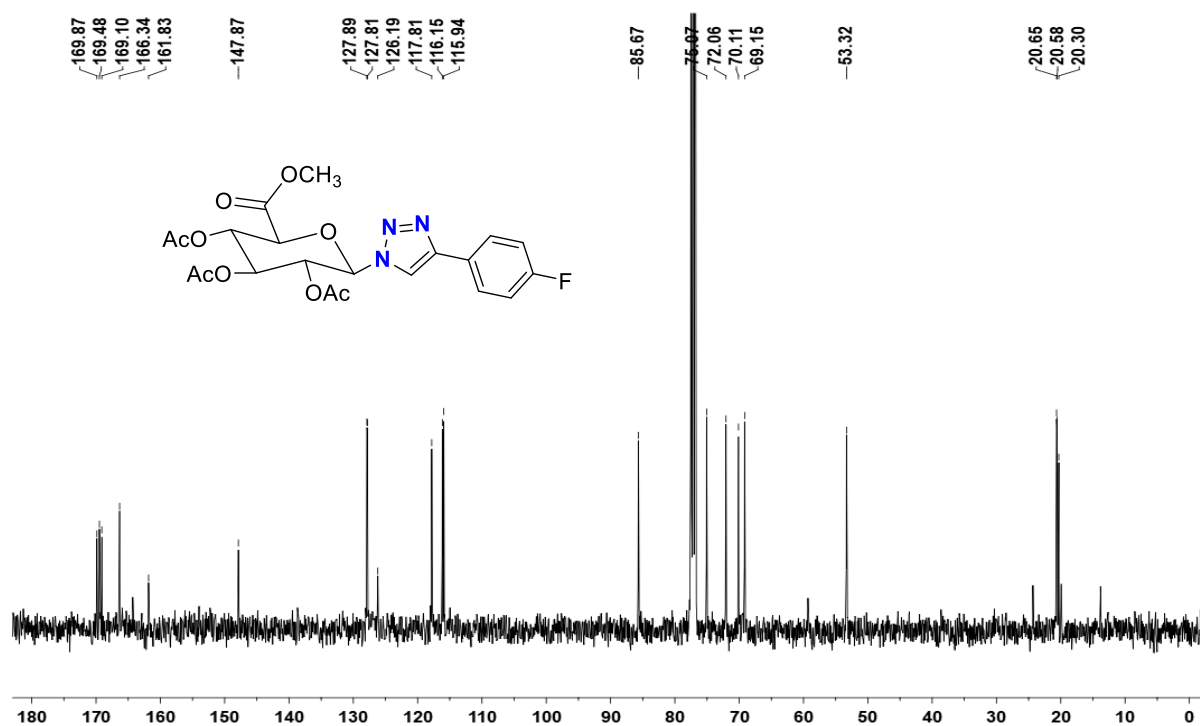

**Figure S40.**  $^{13}\text{C}$  NMR (400 MHz) spectrum of (2R,3R,4S,5S,6S)-2-(4-(4-fluorophenyl)-1H-1,2,3-triazol-1-yl)-6-(methoxycarbonyl)tetrahydro-2H-pyran-3,4,5-triyl triacetate (**C4**)  $\text{CDCl}_3$  at r.t.

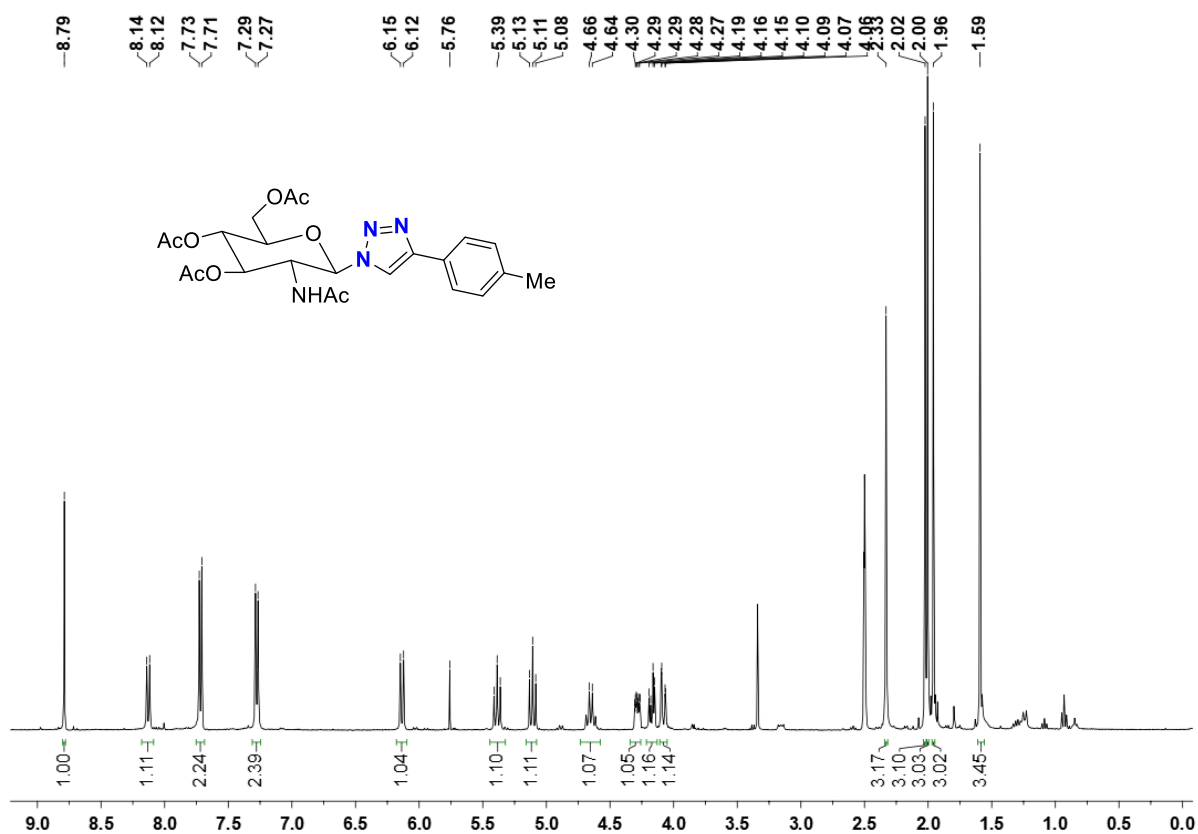

**Figure S41.** <sup>1</sup>H NMR (400 MHz) spectrum of (2R,3S,6S)-5-acetamido-2-(acetoxymethyl)-6-(4-(p-tolyl)-1H-1,2,3-triazol-1-yl)tetrahydro-2H-pyran-3,4-diyl diacetate (**D1**) DMSO at r.t.

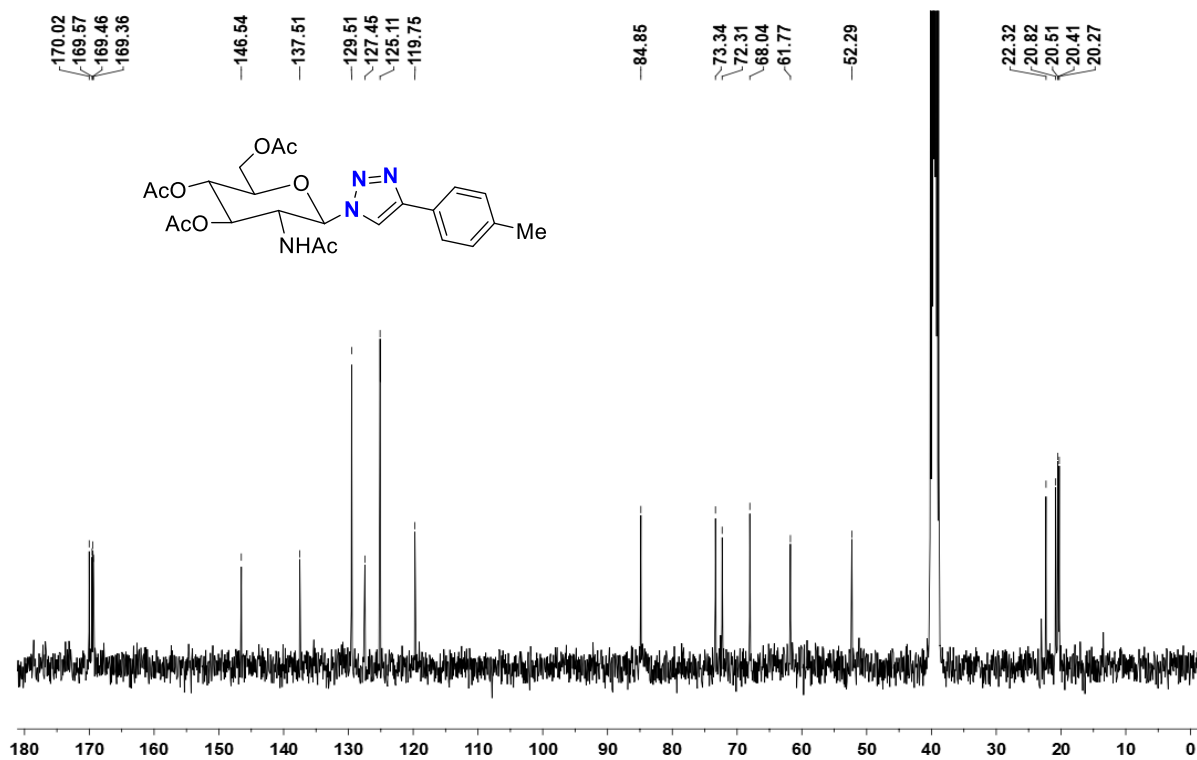

**Figure S42.** <sup>13</sup>C NMR (101 MHz) spectrum of (2R,3S,6S)-5-acetamido-2-(acetoxymethyl)-6-(4-(p-tolyl)-1H-1,2,3-triazol-1-yl)tetrahydro-2H-pyran-3,4-diyl diacetate (**D1**) in DMSO at r.t.

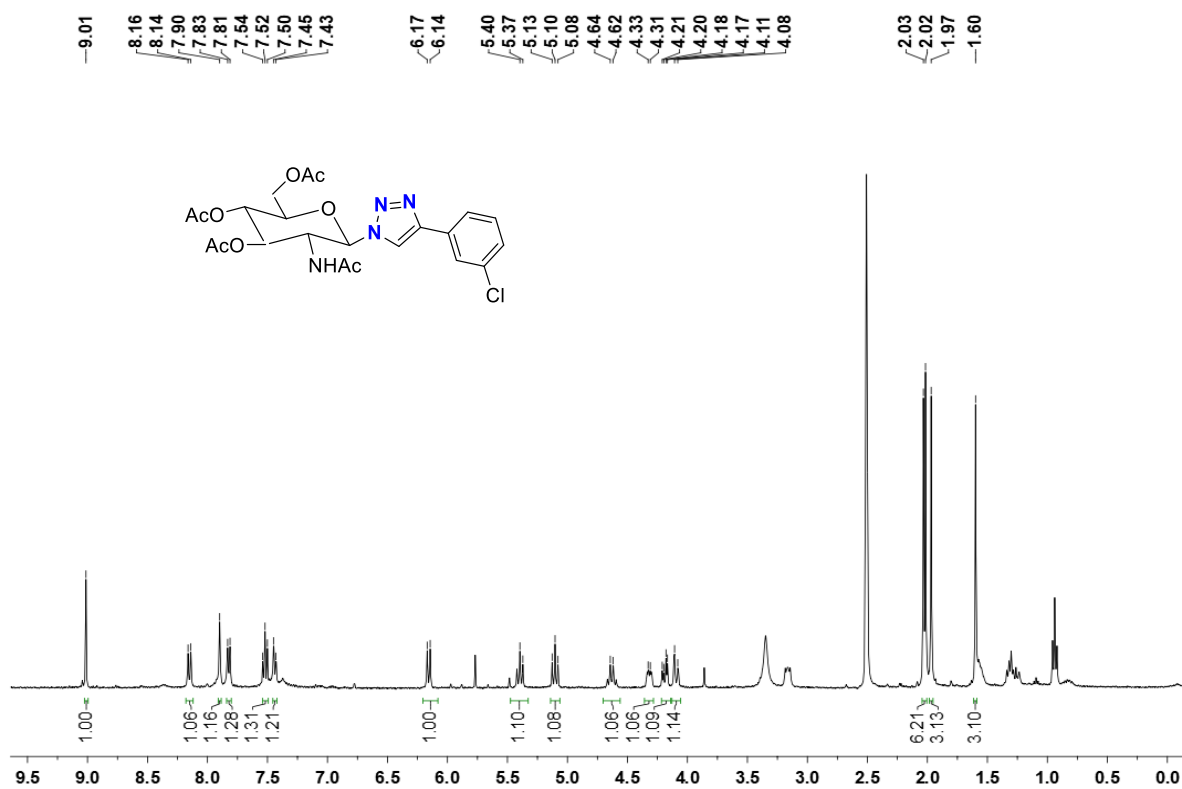

**Figure S43.** <sup>1</sup>H NMR (400 MHz) spectrum of (2R,3S,6S)-5-acetamido-2-(acetoxymethyl)-6-(4-(3-chlorophenyl)-1H-1,2,3-triazol-1-yl)tetrahydro-2H-pyran-3,4-diyl diacetate (**D<sub>2</sub>**) DMSO at r.t.

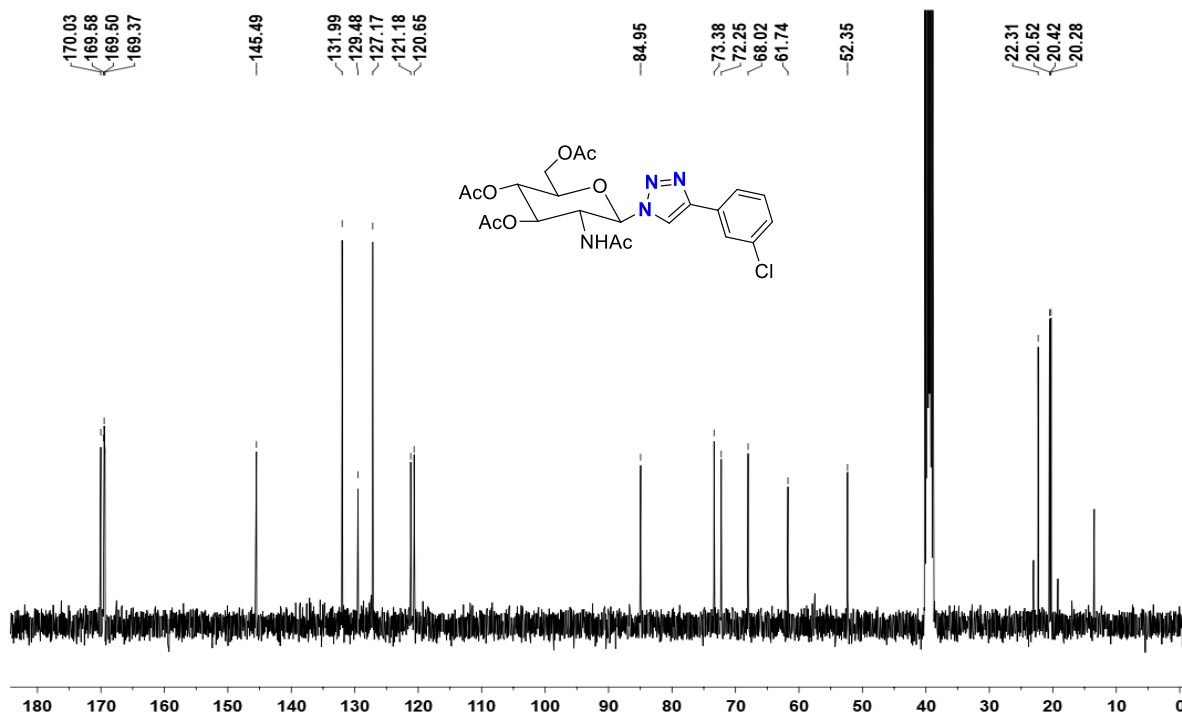

**Figure S44.** <sup>13</sup>C NMR (101 MHz) spectrum of (2R,3S,6S)-5-acetamido-2-(acetoxymethyl)-6-(4-(3-chlorophenyl)-1H-1,2,3-triazol-1-yl)tetrahydro-2H-pyran-3,4-diyl diacetate (**D<sub>2</sub>**) in DMSO at r.t.

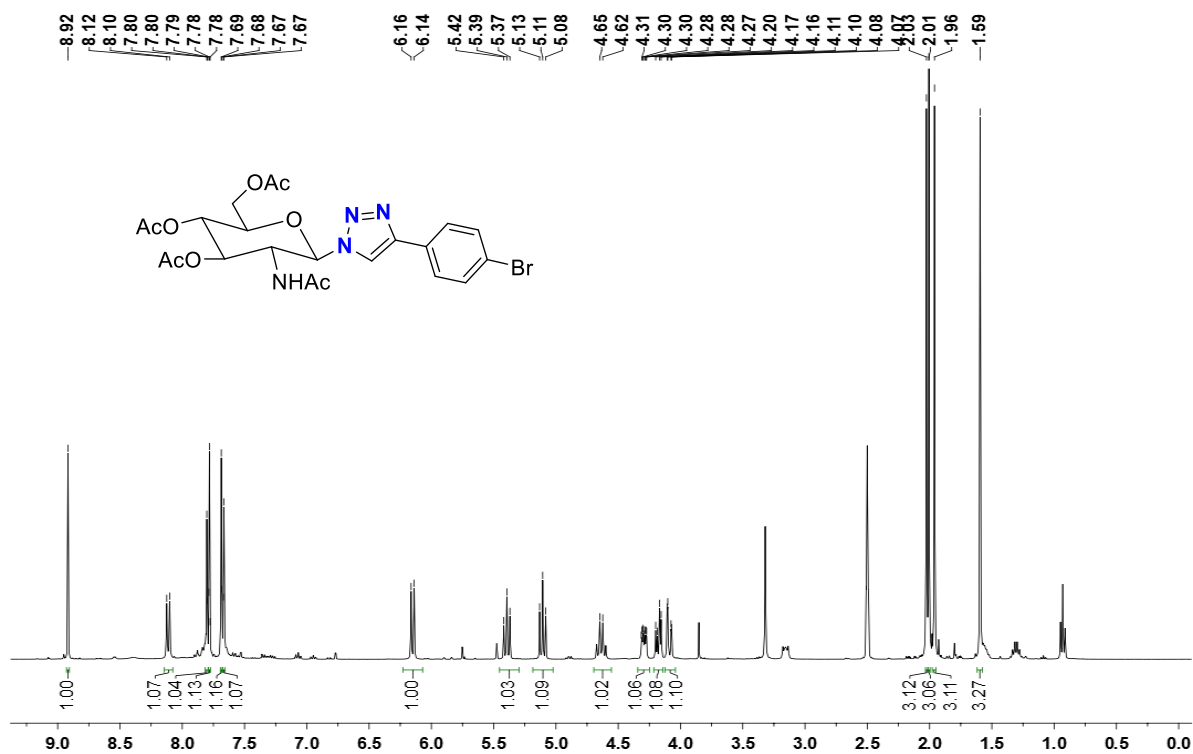

**Figure S45.** <sup>1</sup>H NMR (400 MHz) spectrum of (2R,3S,6S)-5-acetamido-2-(acetoxymethyl)-6-(4-(3-bromophenyl)-1H-1,2,3-triazol-1-yl)tetrahydro-2H-pyran-3,4-diyl diacetate (**D3**) in DMSO at r.t.

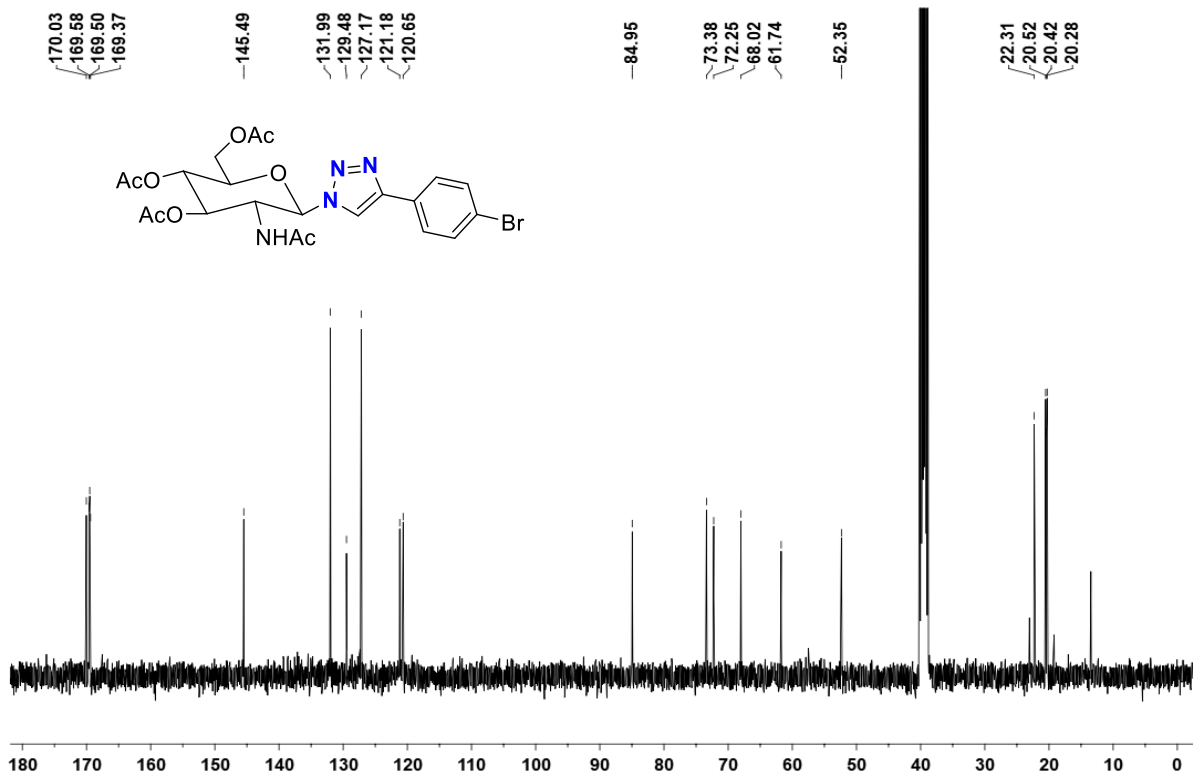

**Figure S46.** <sup>13</sup>C NMR (400 MHz) spectrum of (2R,3S,6S)-5-acetamido-2-(acetoxymethyl)-6-(4-(3-bromophenyl)-1H-1,2,3-triazol-1-yl)tetrahydro-2H-pyran-3,4-diyl diacetate (**D3**) in DMSO at r.t.



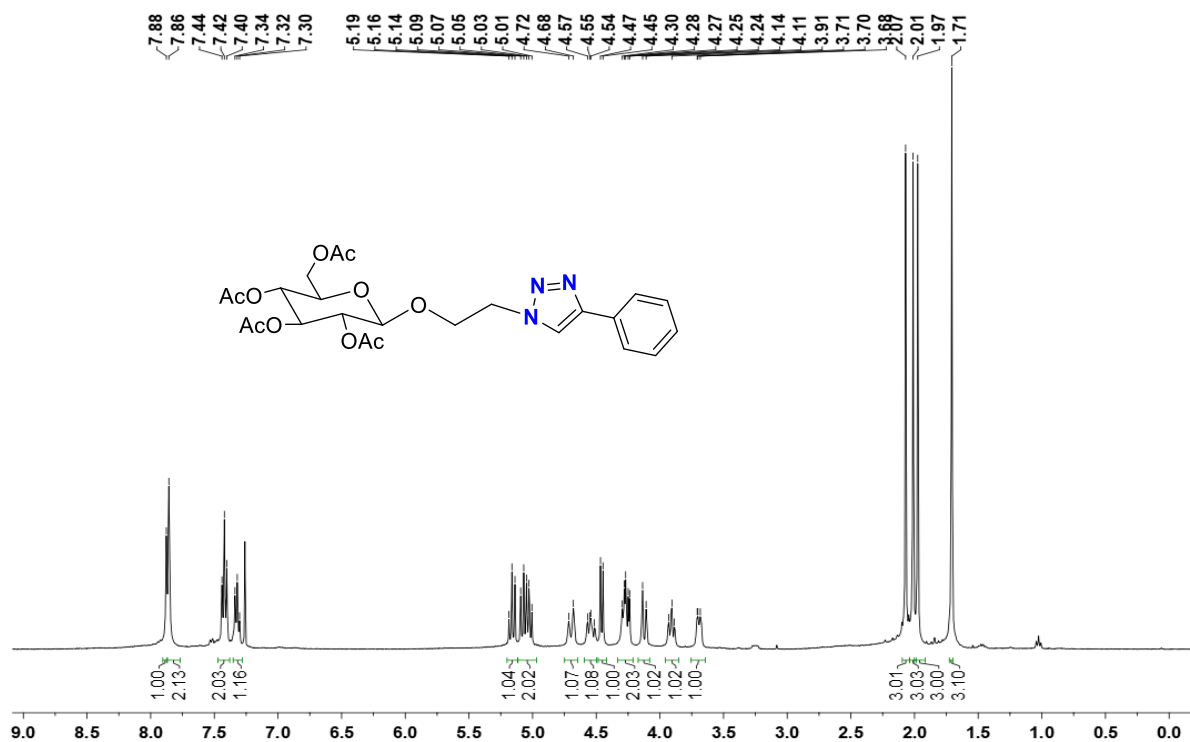

**Figure S47.** <sup>1</sup>H NMR (400 MHz) spectrum of (2R,3R,4S,5R,6R)-2-(acetoxymethyl)-6-(2-(4-phenyl-1H-1,2,3-triazol-1-yl)ethoxy)tetrahydro-2H-pyran-3,4,5-triyl triacetate (**E1**) in CDCl<sub>3</sub> at r.t.

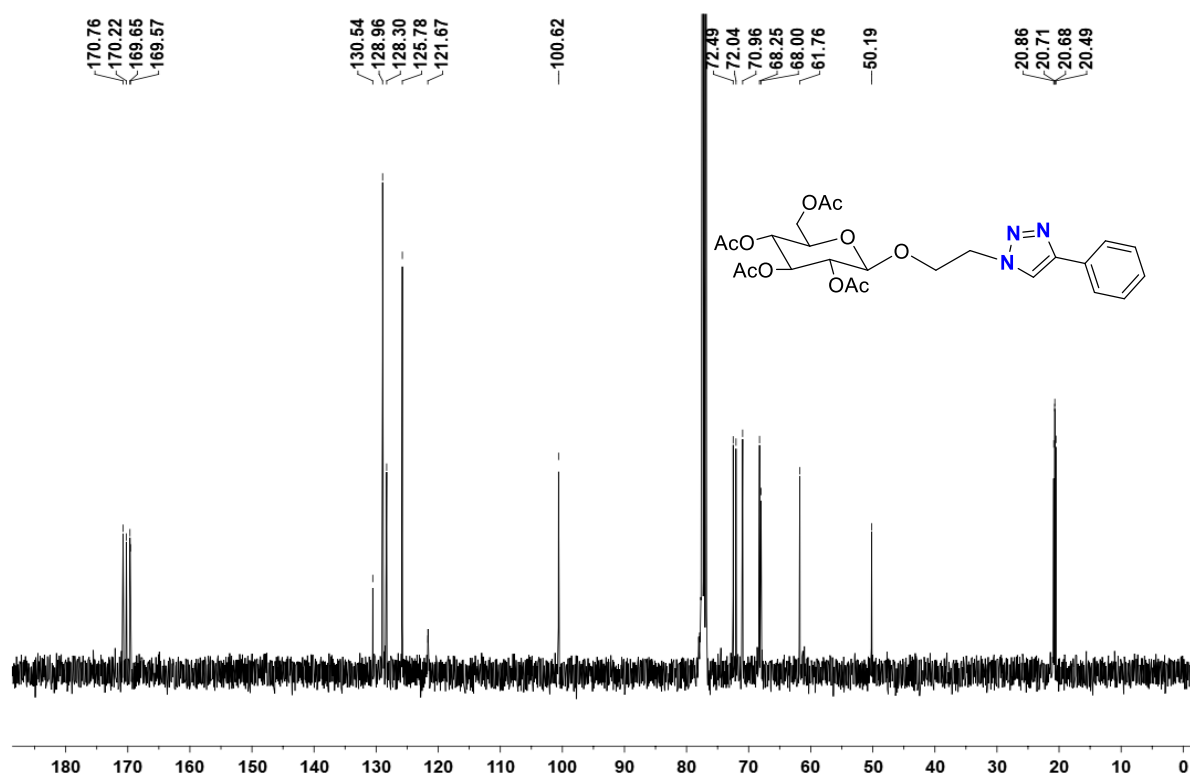

**Figure S48.** <sup>13</sup>C NMR (101 MHz) spectrum of (2R,3R,4S,5R,6R)-2-(acetoxymethyl)-6-(2-(4-phenyl-1H-1,2,3-triazol-1-yl)ethoxy)tetrahydro-2H-pyran-3,4,5-triyl triacetate (**E1**) in CDCl<sub>3</sub> at r.t.

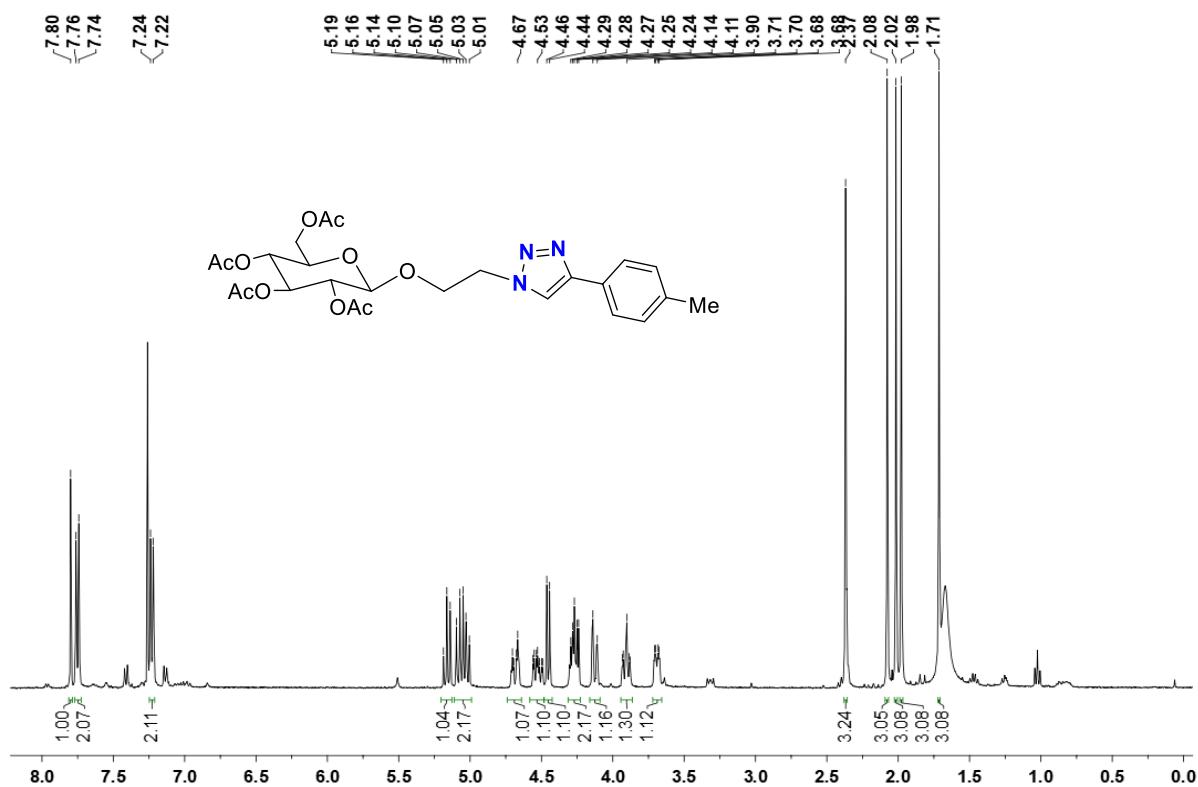

**Figure S49.** <sup>1</sup>H NMR (400 MHz) spectrum of (2R,3R,4S,5R,6R)-2-(acetoxymethyl)-6-(2-(4-(p-tolyl)-1H-1,2,3-triazol-1-yl)ethoxy)tetrahydro-2H-pyran-3,4,5-triyl triacetate (**E**<sub>2</sub>) in CDCl<sub>3</sub> at r.t.

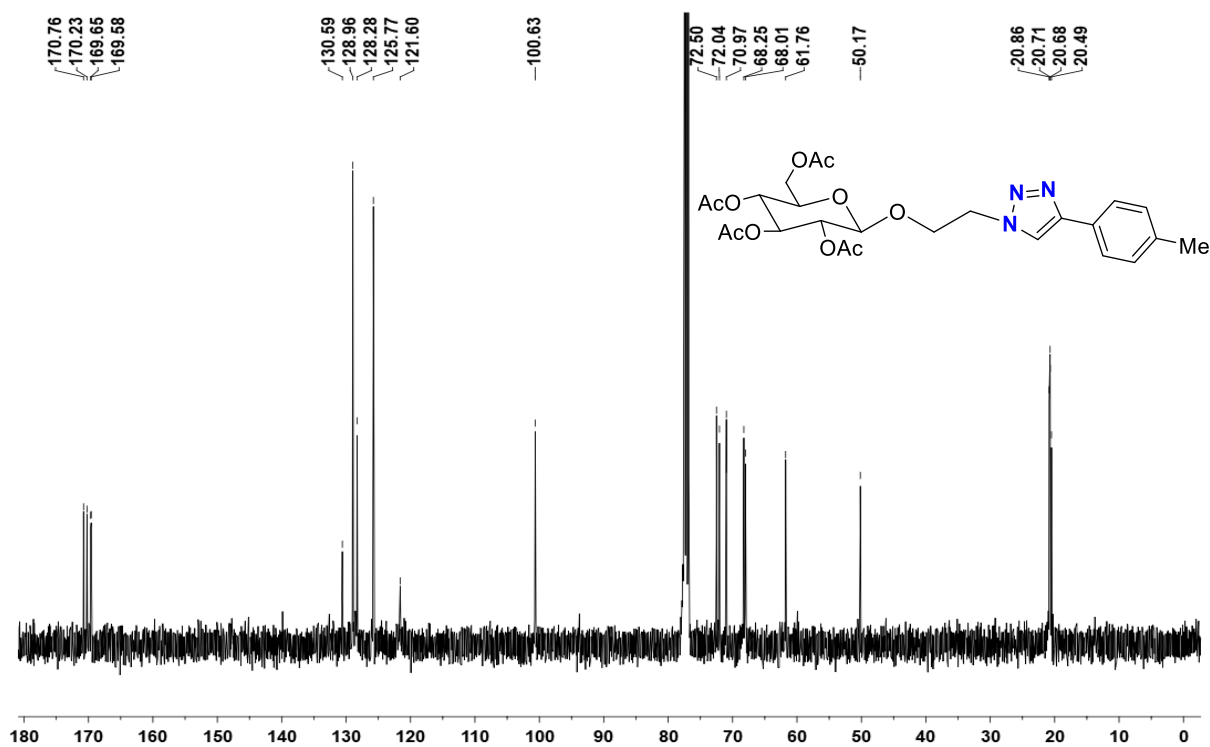

**Figure S50.** <sup>13</sup>C NMR (101 MHz) spectrum of (2R,3R,4S,5R,6R)-2-(acetoxymethyl)-6-(2-(4-(p-tolyl)-1H-1,2,3-triazol-1-yl)ethoxy)tetrahydro-2H-pyran-3,4,5-triyl triacetate (**E**<sub>2</sub>) in CDCl<sub>3</sub> at r.t.

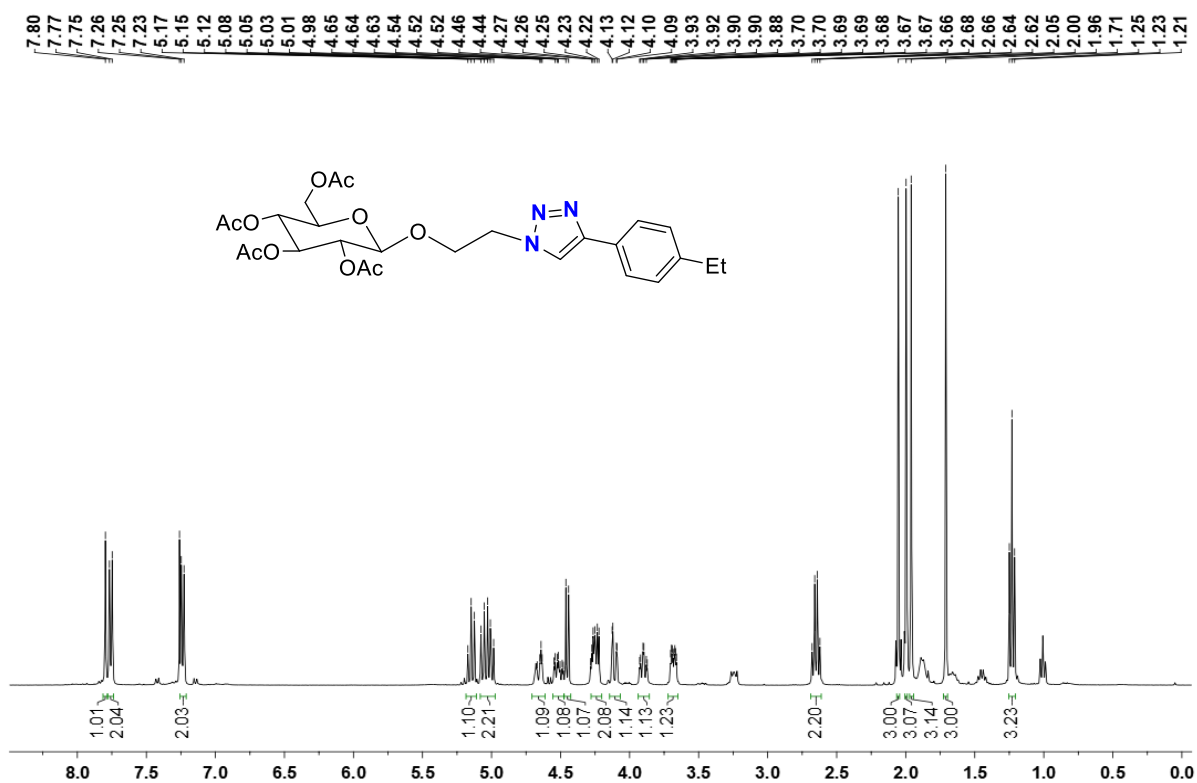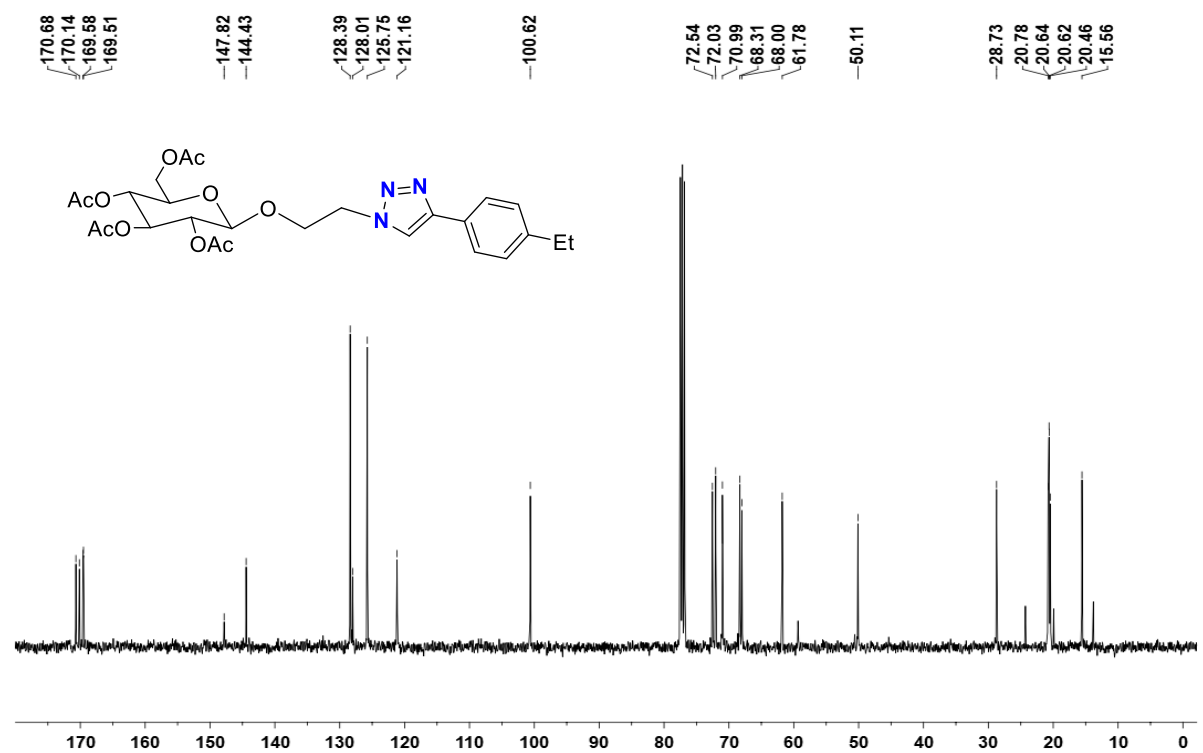

**Figure S52.** <sup>13</sup>C NMR (101 MHz) spectrum of (2R,3R,4S,5R,6R)-2-(acetoxymethyl)-6-(2-(4-(4-ethylphenyl)-1H-1,2,3-triazol-1-yl)ethoxy)tetrahydro-2H-pyran-3,4,5-triyl triacetate (**E3**) in CDCl<sub>3</sub> at r.t.

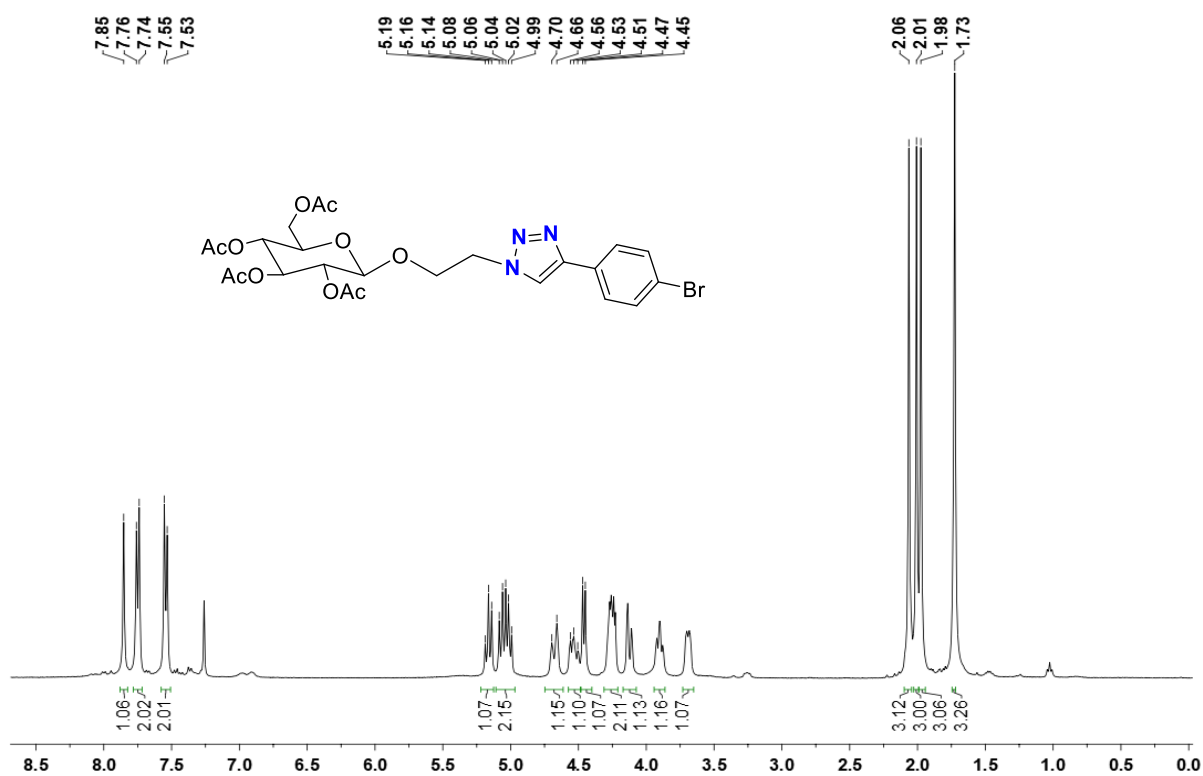

**Figure S53.** <sup>1</sup>H NMR (400 MHz) spectrum of (2R,3R,4S,5R,6R)-2-(acetoxymethyl)-6-(2-(4-(4-bromophenyl)-1H-1,2,3-triazol-1-yl)ethoxy)tetrahydro-2H-pyran-3,4,5-triyl triacetate (**E4**) in CDCl<sub>3</sub> at r.t.

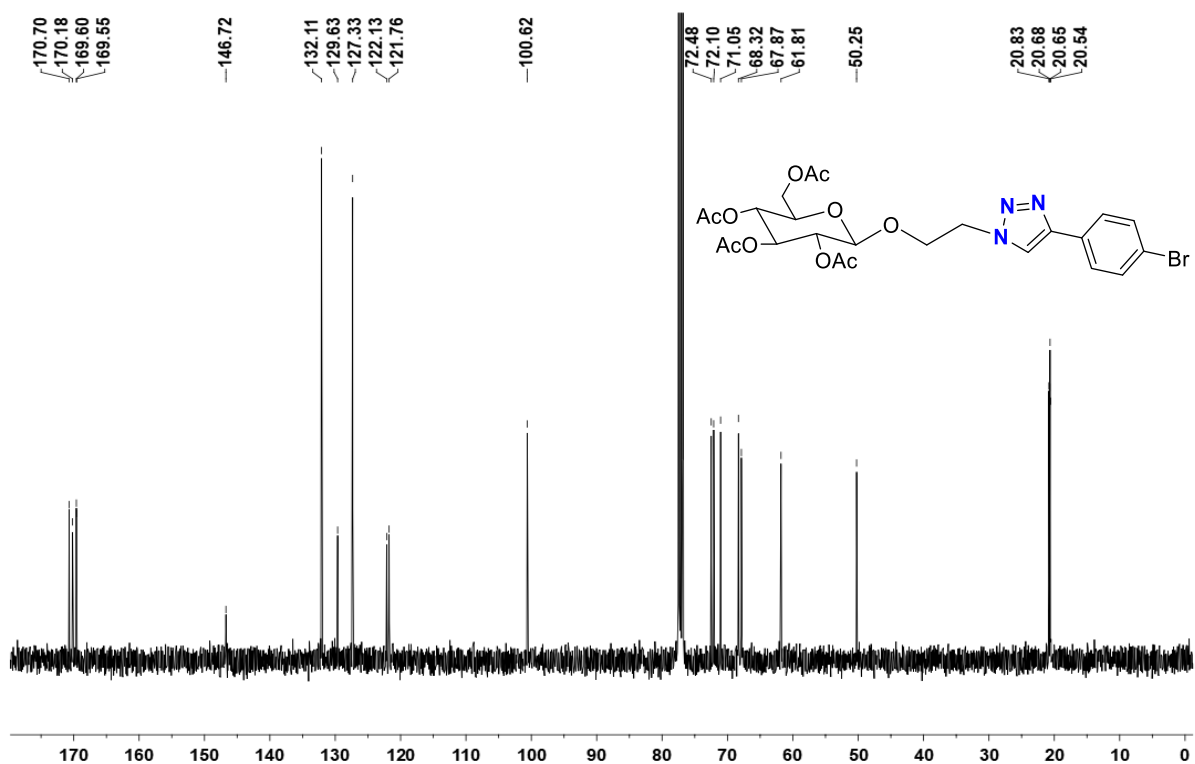

**Figure S54.** <sup>13</sup>C NMR (101 MHz) spectrum of (2R,3R,4S,5R,6R)-2-(acetoxymethyl)-6-(2-(4-(4-bromophenyl)-1H-1,2,3-triazol-1-yl)ethoxy)tetrahydro-2H-pyran-3,4,5-triyl triacetate (**E4**) in CDCl<sub>3</sub> at r.t.

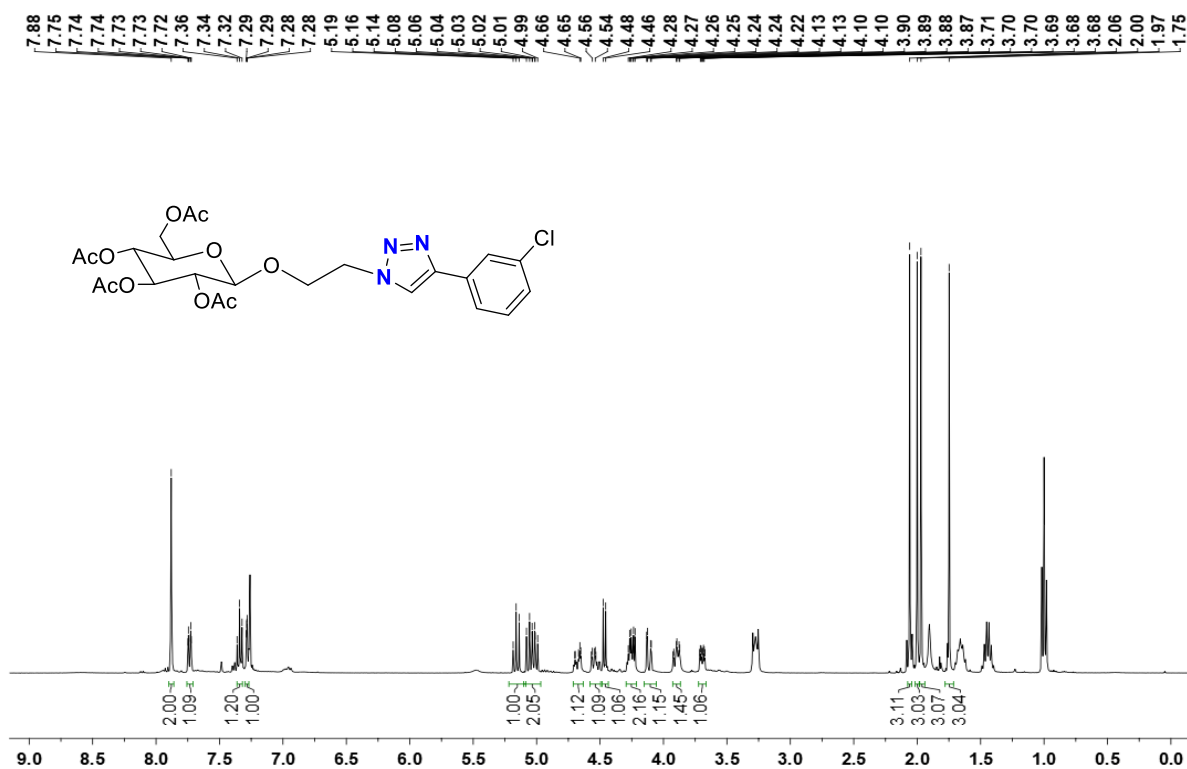

**Figure S55.** <sup>1</sup>H NMR (400 MHz) spectrum of (2R,3R,4S,5R,6R)-2-(acetoxymethyl)-6-(2-(4-(3-chlorophenyl)-1H-1,2,3-triazol-1-yl)ethoxy)tetrahydro-2H-pyran-3,4,5-triyl triacetate (**5**) in CDCl<sub>3</sub> at r.t.

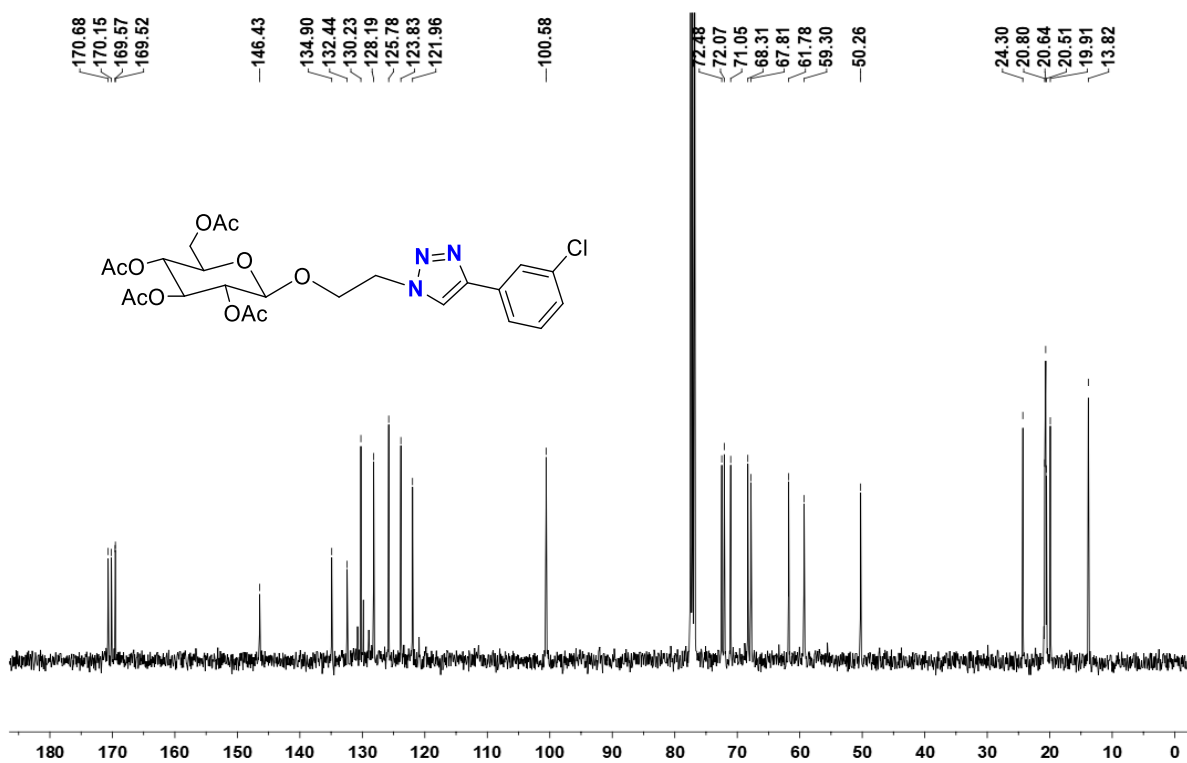

**Figure S56.** <sup>13</sup>C NMR (101 MHz) spectrum of (2R,3R,4S,5R,6R)-2-(acetoxymethyl)-6-(2-(4-(3-chlorophenyl)-1H-1,2,3-triazol-1-yl)ethoxy)tetrahydro-2H-pyran-3,4,5-triyl triacetate (**5**) in CDCl<sub>3</sub> at r.t.

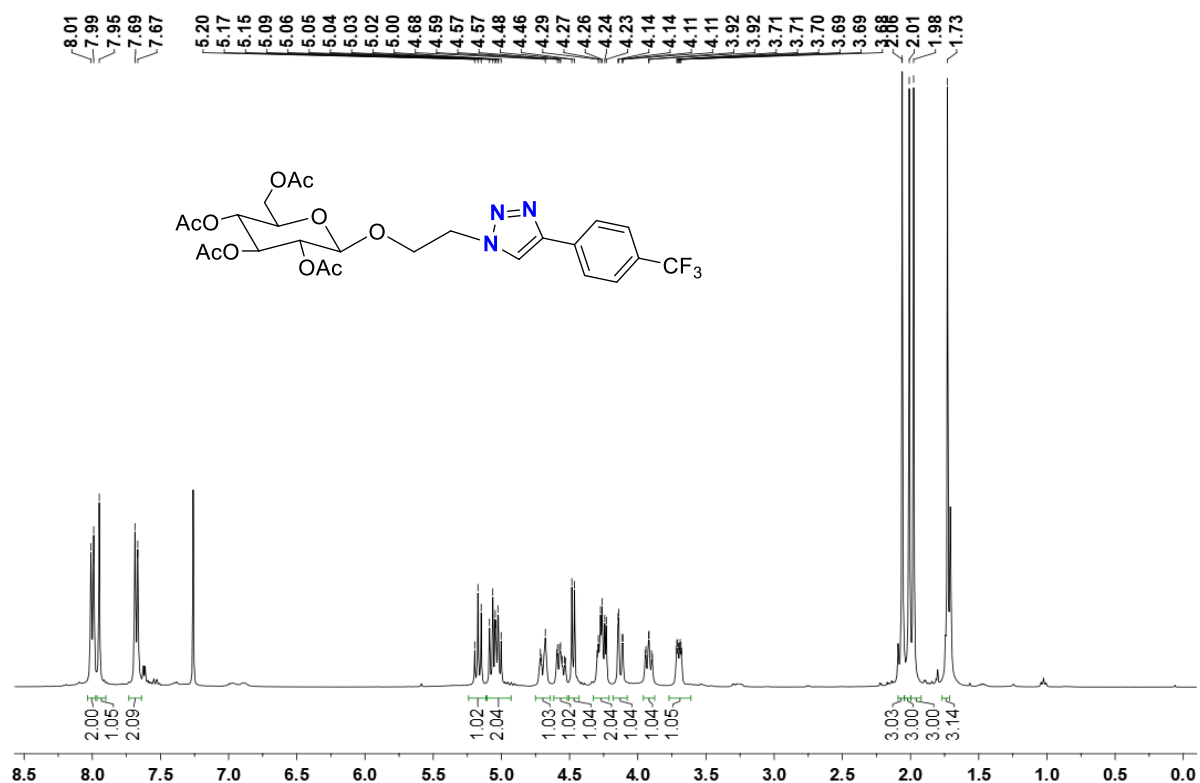

**Figure S57.** <sup>1</sup>H NMR (400 MHz) spectrum of (2R,3R,4S,5R,6R)-2-(acetoxymethyl)-6-(2-(4-(4-(trifluoromethyl)phenyl)-1H-1,2,3-triazol-1-yl)ethoxy)tetrahydro-2H-pyran-3,4,5-triyl triacetate (**E6**) CDCl<sub>3</sub> at r.t.

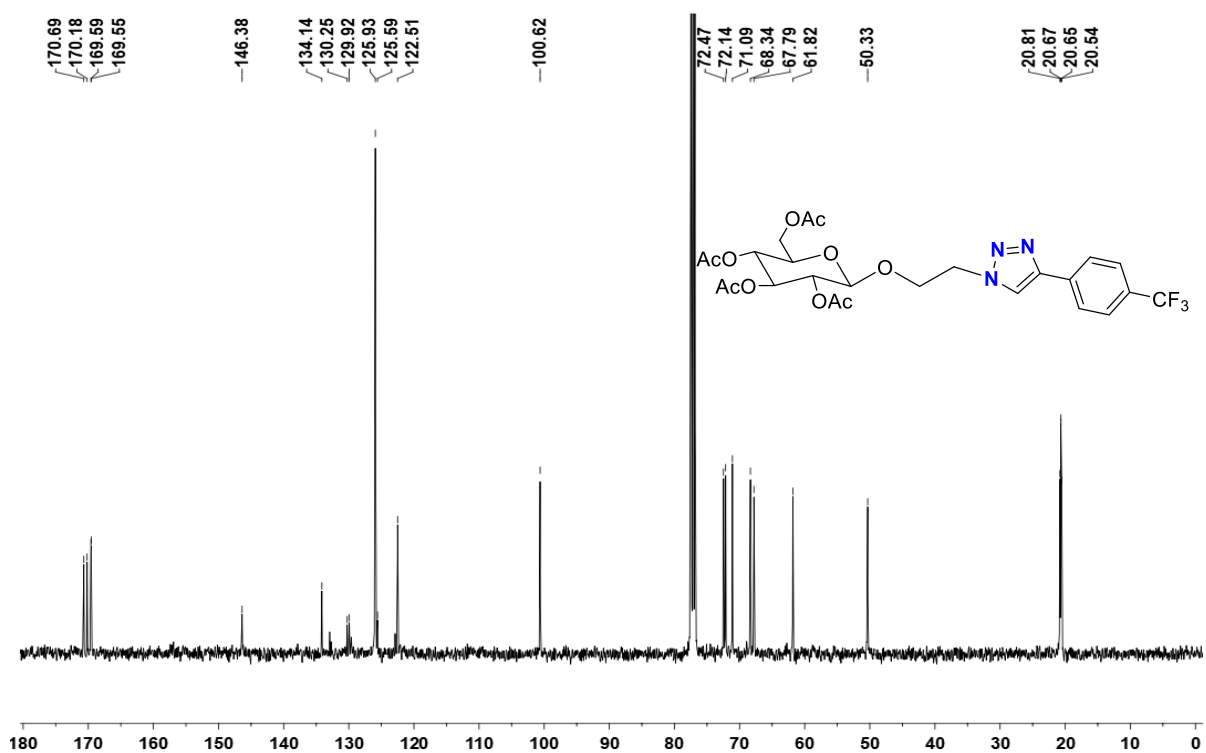

**Figure S58.** <sup>13</sup>C NMR (400 MHz) spectrum of (2R,3R,4S,5R,6R)-2-(acetoxymethyl)-6-(2-(4-(4-(trifluoromethyl)phenyl)-1H-1,2,3-triazol-1-yl)ethoxy)tetrahydro-2H-pyran-3,4,5-triyl triacetate (**E6**) CDCl<sub>3</sub> at r.t.

## Molecular structure determination by single crystal X-ray crystallography

A crystal of complex **1** with accession code CCDC 2240116 was mounted under crystal oil coated at ambient conditions. All measurements were made on an *Oxford Diffraction SuperNova* area-detector diffractometer using an INCOATEC micro source (Mo-K $\alpha$  radiation,  $\lambda = 0.71073$  Å, multilayer optics) and Al filtered.

Data reduction was performed using the *CrysAlisPro*<sup>[S4]</sup> program. The intensities were corrected for Lorentz and polarization effects, and an absorption correction based on the multi-scan method using SCALE3 ABSPACK in *CrysAlisPro*<sup>[S4]</sup> was applied. Data collection and refinement parameters are given in Table S1.

OleX<sup>S5</sup> and refinement was carried out using least-square minimization implemented in ShelXL.<sup>S6, S7</sup> All nonhydrogen atoms were refined with anisotropic displacement parameters. Hydrogen atom positions were fixed geometrically in idealized positions and were refined using a riding model.

**Table S1.** Crystallographic Data and Refinement Parameters for **1**.

|                                                              |                                                                              |
|--------------------------------------------------------------|------------------------------------------------------------------------------|
| Complex                                                      | <b>1</b>                                                                     |
| Empirical formula                                            | C <sub>16</sub> H <sub>15</sub> CuIN <sub>3</sub> O                          |
| Formula weight (g mol <sup>-1</sup> )                        | 455.75                                                                       |
| Temperature                                                  | 100.00(10)                                                                   |
| Radiation                                                    | MoK $\alpha$ ( $\lambda = 0.71073$ )                                         |
| Crystal system                                               | Monoclinic                                                                   |
| Space group                                                  | <i>P2<sub>1</sub>/c</i>                                                      |
| <i>a</i> (Å)                                                 | 12.2982(5)                                                                   |
| <i>b</i> (Å)                                                 | 8.7867(3)                                                                    |
| <i>c</i> (Å)                                                 | 15.5899(6)                                                                   |
| $\alpha$ (deg)                                               | 90                                                                           |
| $\beta$ (deg)                                                | 109.228(4)                                                                   |
| $\gamma$ (deg)                                               | 90                                                                           |
| volume (Å <sup>3</sup> )                                     | 1590.68(11)                                                                  |
| <i>Z</i>                                                     | 4                                                                            |
| <i>D</i> <sub>calc</sub> (g cm <sup>-3</sup> )               | 1.381                                                                        |
| $\mu$ (mm <sup>-1</sup> )                                    | 1.903                                                                        |
| <i>F</i> (000)                                               | 888.0                                                                        |
| Crystal Size (mm <sup>3</sup> )                              | 0.2 × 0.1 × 0.1                                                              |
| 2 $\theta$ Range (deg)                                       | 6.92 to 60.878                                                               |
| Index Ranges                                                 | -15 ≤ <i>h</i> ≤ 16, -11 ≤ <i>k</i> ≤ 11, -21 ≤ <i>l</i> ≤ 19                |
| Reflections collected                                        | 15069                                                                        |
| Independent reflections                                      | 3809 [ <i>R</i> <sub>int</sub> = 0.0476, <i>R</i> <sub>sigma</sub> = 0.0397] |
| Completeness to theta                                        | 99.96                                                                        |
| Refinement method                                            | Full-matrix least-squares on <i>F</i> <sup>2</sup>                           |
| Data/Restraints/parameters                                   | 3809/0/200                                                                   |
| Goodness-of-fit on <i>F</i> <sup>2</sup>                     | 1.038                                                                        |
| Final <i>R</i> indices [ <i>I</i> > 2 $\sigma$ ( <i>I</i> )] | <i>R</i> <sub>1</sub> = 0.0271, <i>wR</i> <sub>2</sub> = 0.0623              |
| <i>R</i> indices (all data)                                  | <i>R</i> <sub>1</sub> = 0.0322, <i>wR</i> <sub>2</sub> = 0.0644              |
| Largest diff. peak/hole (e Å <sup>-3</sup> )                 | 0.69/-0.69                                                                   |

**Table S2.** Selected bond lengths (Å) around the metal centre in copper complexes **1** and **2**.

|                    | Bond lengths |
|--------------------|--------------|
| Complexes/Bonds    | <b>1</b>     |
| Cu–N(pyridine)     | 2.091(2)     |
| Cu–N(pyrazole)     | 2.118(2)     |
| Cu–I               | 2.6250(4)    |
| Cu <sup>1</sup> –I | 2.6271(3)    |
| Cu–Cu <sup>a</sup> | 2.6101(6)    |

Symmetry code: <sup>a</sup>1-X,1-Y,1-Z

**Table S3.** Selected bond angles (°) around the metal centre in copper complexes **1** and **2**.

| Bond angles                           |             |
|---------------------------------------|-------------|
| Cu1–I1–Cu1 <sup>a</sup>               | 59.599(11)  |
| I1–Cu1–I1 <sup>a</sup>                | 120.401(11) |
| Cu1 <sup>a</sup> –Cu1–I1              | 60.240(12)  |
| Cu1 <sup>a</sup> –Cu1–I1 <sup>a</sup> | 60.161(12)  |
| N3–Cu1–I1 <sup>a</sup>                | 104.02(6)   |
| N3–Cu1–I1                             | 119.32(6)   |
| N3–Cu1–Cu1 <sup>a</sup>               | 137.42(6)   |
| N1–Cu1–I1                             | 103.51(6)   |
| N1–Cu1–I1 <sup>a</sup>                | 112.20(6)   |
| N1–Cu1–Cu1 <sup>a</sup>               | 127.96(6)   |
| N1–Cu1–N3                             | 94.44(8)    |

Symmetry code: <sup>a</sup> 1-X,1-Y,1-Z

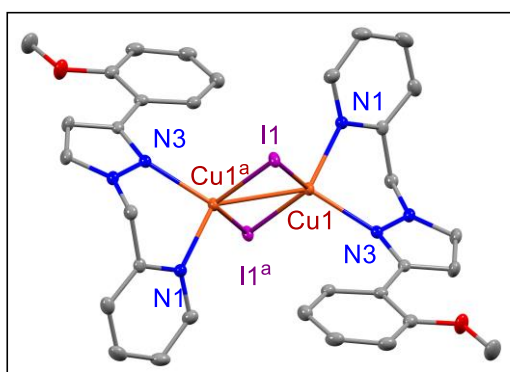

**Figure S59.** Molecular structure of complex **1**.



**Table S4. Optimised Reaction (Method A: DES TBAB/glycerol, [Cu] 3 mol%, 70 °C, 12 h): Zero Pass CHEM21 green metrics toolkit**

| Supp+J5+B1:S29+B1:S32+B1:S31+B1:S30+B1:S29+B+B1: Summary of Zero Pass Metrics Toolkit                   |             |               |                        |          |             |             |             |                  |                           |                               |              |                                                           |                    |                |                           |                               |              |  |
|---------------------------------------------------------------------------------------------------------|-------------|---------------|------------------------|----------|-------------|-------------|-------------|------------------|---------------------------|-------------------------------|--------------|-----------------------------------------------------------|--------------------|----------------|---------------------------|-------------------------------|--------------|--|
| Yield, conversion, selectivity, AE, RME                                                                 |             |               |                        |          |             |             |             |                  |                           |                               |              |                                                           |                    |                |                           |                               |              |  |
| Reactant (Limiting Reactant First)                                                                      | Mass (g)    | MW            | Mol                    | Catalyst | Mass (g)    | Reagent     | Mass (g)    | Reaction solvent | Volume (cm <sup>3</sup> ) | Density (g ml <sup>-1</sup> ) | Mass (g)     | Work up chemical                                          | Mass (g)           | Workup solvent | Volume (cm <sup>3</sup> ) | Density (g ml <sup>-1</sup> ) | Mass (g)     |  |
| Glycosides                                                                                              | 4.11        | 411.20        | 0.01                   | [Cu]     | 0.14        |             |             | TBAB/glycerol    | 40.00                     | 1.18                          | 47.27        |                                                           | 25 % ammonia solut | 20.00          | 0.90                      |                               | 18.00        |  |
| Phenylacetylene                                                                                         | 1.02        | 102.13        | 0.01                   |          |             |             |             |                  |                           |                               |              |                                                           |                    |                |                           |                               |              |  |
| Sodium azide                                                                                            | 1.63        | 65.01         | 0.02                   |          |             |             |             |                  |                           |                               |              |                                                           |                    |                |                           |                               |              |  |
| <b>Total</b>                                                                                            | <b>6.76</b> | <b>578.34</b> |                        |          | <b>0.14</b> |             | <b>0.00</b> |                  |                           |                               | <b>47.27</b> |                                                           | <b>0.00</b>        |                |                           |                               | <b>18.00</b> |  |
|                                                                                                         |             |               |                        |          |             | <b>Flag</b> |             |                  |                           |                               |              |                                                           |                    |                |                           |                               |              |  |
| $AE = \frac{\text{molecular weight of product}}{\text{total molecular weight of reactants}} \times 100$ |             |               |                        |          |             | Yield       | 98.0        | 98.0             |                           |                               |              |                                                           |                    |                |                           |                               |              |  |
|                                                                                                         |             |               |                        |          |             | Conversion  | 100.0       | 100.0            |                           |                               |              |                                                           |                    |                |                           |                               |              |  |
|                                                                                                         |             |               |                        |          |             | Selectivity | 98.0        | 98.0             |                           |                               |              |                                                           |                    |                |                           |                               |              |  |
| $RME = \frac{\text{mass of isolated product}}{\text{total mass of reactants}} \times 100$               |             |               |                        |          |             | AE          | 82.2        |                  |                           |                               |              |                                                           |                    |                |                           |                               |              |  |
|                                                                                                         |             |               |                        |          |             | RME         | 69.0        |                  |                           |                               |              |                                                           |                    |                |                           |                               |              |  |
| <b>Solvents (Zero Pass)</b>                                                                             |             |               |                        |          |             |             |             |                  |                           |                               |              | mass                                                      | mw                 | mol            |                           |                               |              |  |
| <b>Highly hazardous solvents (Red flag for any of the following)</b>                                    |             |               |                        |          |             |             |             |                  |                           |                               |              | Product                                                   | 4.659              | 475.454        | 0.0097991                 |                               |              |  |
| Et <sub>2</sub> O, Benzene, CCl <sub>4</sub> , chloroform, DCE, nitromethane, CS <sub>2</sub> , HMPA    |             |               |                        |          |             |             |             |                  |                           |                               |              | Unreacted limiting reactant                               | mass               |                |                           |                               |              |  |
|                                                                                                         |             |               |                        |          |             |             |             |                  |                           |                               |              | 0.000                                                     |                    |                |                           |                               |              |  |
| <b>Health and Safety (Zero Pass)</b>                                                                    |             |               |                        |          |             |             |             |                  |                           |                               |              |                                                           |                    |                |                           |                               |              |  |
| <b>Health &amp; safety (Red flag for any of the following)</b>                                          |             |               |                        |          |             |             |             |                  |                           |                               |              | <b>List substances plus the red flagged H-codes below</b> |                    |                |                           |                               |              |  |
| Highly explosive                                                                                        |             |               | H200, H201, H202, H203 |          |             | None        |             |                  |                           |                               |              |                                                           |                    |                |                           |                               |              |  |
| Explosive thermal runaway                                                                               |             |               | H240                   |          |             | None        |             |                  |                           |                               |              |                                                           |                    |                |                           |                               |              |  |
| Fatally toxic                                                                                           |             |               | H300, H310, H330       |          |             | None        |             |                  |                           |                               |              |                                                           |                    |                |                           |                               |              |  |
| Mutagenic                                                                                               |             |               | H350                   |          |             | None        |             |                  |                           |                               |              |                                                           |                    |                |                           |                               |              |  |
| Repro-toxic                                                                                             |             |               | H360                   |          |             | None        |             |                  |                           |                               |              |                                                           |                    |                |                           |                               |              |  |
| Serious environmental implications                                                                      |             |               | H420                   |          |             | None        |             |                  |                           |                               |              |                                                           |                    |                |                           |                               |              |  |





**Table S6. Optimised Reaction (Method B: DES ChCl/glycerol, [Cu] 3 mol%, 70 °C, 12 h): Zero Pass CHEM21 green metrics toolkit**

| Supp+J5+B1:S29+B1:S32+B1:S31+B1:S30+B1:S29+B+B1: Summary of Zero Pass Metrics Toolkit                   |             |               |                        |          |             |             |             |                  |                           |                               |              |                                                           |                    |                |                           |                               |              |  |
|---------------------------------------------------------------------------------------------------------|-------------|---------------|------------------------|----------|-------------|-------------|-------------|------------------|---------------------------|-------------------------------|--------------|-----------------------------------------------------------|--------------------|----------------|---------------------------|-------------------------------|--------------|--|
| Yield, conversion, selectivity, AE, RME                                                                 |             |               |                        |          |             |             |             |                  |                           |                               |              |                                                           |                    |                |                           |                               |              |  |
| Reactant (Limiting Reactant First)                                                                      | Mass (g)    | MW            | Mol                    | Catalyst | Mass (g)    | Reagent     | Mass (g)    | Reaction solvent | Volume (cm <sup>3</sup> ) | Density (g ml <sup>-1</sup> ) | Mass (g)     | Work up chemical                                          | Mass (g)           | Workup solvent | Volume (cm <sup>3</sup> ) | Density (g ml <sup>-1</sup> ) | Mass (g)     |  |
| Glycosides                                                                                              | 4.11        | 411.20        | 0.01                   | [Cu]     | 0.14        |             |             | ChCl/glycerol    | 40.00                     | 1.19                          | 47.76        |                                                           | 25 % ammonia solut | 20.00          | 0.90                      |                               | 18.00        |  |
| Phenylacetylene                                                                                         | 1.02        | 102.13        | 0.01                   |          |             |             |             |                  |                           |                               |              |                                                           |                    |                |                           |                               |              |  |
| Sodium azide                                                                                            | 1.63        | 65.01         | 0.02                   |          |             |             |             |                  |                           |                               |              |                                                           |                    |                |                           |                               |              |  |
| <b>Total</b>                                                                                            | <b>6.76</b> | <b>578.34</b> |                        |          | <b>0.14</b> |             | <b>0.00</b> |                  |                           |                               | <b>47.76</b> |                                                           | <b>0.00</b>        |                |                           |                               | <b>18.00</b> |  |
|                                                                                                         |             |               |                        |          |             | <b>Flag</b> |             |                  |                           |                               |              |                                                           |                    |                |                           |                               |              |  |
| $AE = \frac{\text{molecular weight of product}}{\text{total molecular weight of reactants}} \times 100$ |             |               |                        |          |             | Yield       | 94.0        | 94.0             |                           |                               |              |                                                           |                    |                |                           |                               |              |  |
|                                                                                                         |             |               |                        |          |             | Conversion  | 100.0       | 100.0            |                           |                               |              |                                                           |                    |                |                           |                               |              |  |
|                                                                                                         |             |               |                        |          |             | Selectivity | 94.0        | 94.0             |                           |                               |              |                                                           |                    |                |                           |                               |              |  |
| $RME = \frac{\text{mass of isolated product}}{\text{total mass of reactants}} \times 100$               |             |               |                        |          |             | AE          | 82.2        |                  |                           |                               |              |                                                           |                    |                |                           |                               |              |  |
|                                                                                                         |             |               |                        |          |             | RME         | 66.1        |                  |                           |                               |              |                                                           |                    |                |                           |                               |              |  |
| <b>Solvents (Zero Pass)</b>                                                                             |             |               |                        |          |             |             |             |                  |                           |                               |              | mass                                                      | mw                 | mol            |                           |                               |              |  |
| <b>Highly hazardous solvents (Red flag for any of the following)</b>                                    |             |               |                        |          |             |             |             |                  |                           |                               |              | Product                                                   | 4.469              | 475.454        | 0.0093994                 |                               |              |  |
| Et <sub>2</sub> O, Benzene, CCl <sub>4</sub> , chloroform, DCE, nitromethane, CS <sub>2</sub> , HMPA    |             |               |                        |          |             |             |             |                  |                           |                               |              | Unreacted limiting reactant                               | mass               |                |                           |                               |              |  |
|                                                                                                         |             |               |                        |          |             |             |             |                  |                           |                               |              | 0.000                                                     |                    |                |                           |                               |              |  |
| <b>Health and Safety (Zero Pass)</b>                                                                    |             |               |                        |          |             |             |             |                  |                           |                               |              |                                                           |                    |                |                           |                               |              |  |
| <b>Health &amp; safety (Red flag for any of the following)</b>                                          |             |               |                        |          |             |             |             |                  |                           |                               |              | <b>List substances plus the red flagged H-codes below</b> |                    |                |                           |                               |              |  |
| Highly explosive                                                                                        |             |               | H200, H201, H202, H203 |          |             | None        |             |                  |                           |                               |              |                                                           |                    |                |                           |                               |              |  |
| Explosive thermal runaway                                                                               |             |               | H240                   |          |             | None        |             |                  |                           |                               |              |                                                           |                    |                |                           |                               |              |  |
| Fatally toxic                                                                                           |             |               | H300, H310, H330       |          |             | None        |             |                  |                           |                               |              |                                                           |                    |                |                           |                               |              |  |
| Mutagenic                                                                                               |             |               | H350                   |          |             | None        |             |                  |                           |                               |              |                                                           |                    |                |                           |                               |              |  |
| Repro-toxic                                                                                             |             |               | H360                   |          |             | None        |             |                  |                           |                               |              |                                                           |                    |                |                           |                               |              |  |
| Serious environmental implications                                                                      |             |               | H420                   |          |             | None        |             |                  |                           |                               |              |                                                           |                    |                |                           |                               |              |  |

**Table S7. Optimised Reaction (Method B: DES ChCl/glycerol, [Cu] 3 mol%, 70 °C, 12 h): First Pass CHEM21 green metrics toolkit**

| Supplementary Information: Appendix 2                                                             |             |                                                                                                                                                                            |      | Summary of First Pass Metrics Toolkit |             |         |             |                  |                            |                               |                             |                  |             |                   |                           |                               |              |  |
|---------------------------------------------------------------------------------------------------|-------------|----------------------------------------------------------------------------------------------------------------------------------------------------------------------------|------|---------------------------------------|-------------|---------|-------------|------------------|----------------------------|-------------------------------|-----------------------------|------------------|-------------|-------------------|---------------------------|-------------------------------|--------------|--|
| Yield, AE, RME, MI/PMI and OE                                                                     |             |                                                                                                                                                                            |      |                                       |             |         |             |                  |                            |                               |                             |                  |             |                   |                           |                               |              |  |
| Reactant (Limiting Reactant First)                                                                | Mass (g)    | MW                                                                                                                                                                         | Mol  | Catalyst                              | Mass (g)    | Reagent | Mass (g)    | Reaction solvent | Volume (cm <sup>3</sup> )  | Density (g ml <sup>-1</sup> ) | Mass (g)                    | Work up chemical | Mass (g)    | Workup solvent    | Volume (cm <sup>3</sup> ) | Density (g ml <sup>-1</sup> ) | Mass (g)     |  |
| Glycosides                                                                                        | 4.11        | 411.20                                                                                                                                                                     | 0.01 | [Cu]                                  | 0.14        |         |             | ChCl/glycerol    | 40.00                      | 1.19                          | 47.76                       |                  |             | 25 % ammonia solu | 20.00                     | 0.90                          | 18.00        |  |
| Phenylacetylene                                                                                   | 1.02        | 102.13                                                                                                                                                                     | 0.01 |                                       |             |         |             |                  |                            |                               |                             |                  |             |                   |                           |                               |              |  |
| Sodium azide                                                                                      | 1.63        | 65.01                                                                                                                                                                      | 0.02 |                                       |             |         |             |                  |                            |                               |                             |                  |             |                   |                           |                               |              |  |
| <b>Total</b>                                                                                      | <b>6.76</b> | <b>578.34</b>                                                                                                                                                              |      |                                       | <b>0.14</b> |         | <b>0.00</b> |                  |                            |                               | <b>47.76</b>                |                  | <b>0.00</b> |                   |                           |                               | <b>18.00</b> |  |
|                                                                                                   |             |                                                                                                                                                                            |      |                                       |             |         |             |                  | Flag                       |                               |                             |                  |             |                   |                           |                               |              |  |
|                                                                                                   |             |                                                                                                                                                                            |      |                                       |             |         |             |                  | Yield                      | 94.0                          | 94.0                        |                  |             |                   |                           |                               |              |  |
|                                                                                                   |             |                                                                                                                                                                            |      |                                       |             |         |             |                  | Conversion                 | 100.0                         | 100.0                       |                  |             |                   |                           |                               |              |  |
|                                                                                                   |             |                                                                                                                                                                            |      |                                       |             |         |             |                  | Selectivity                | 94.0                          | 94.0                        |                  |             |                   |                           |                               |              |  |
|                                                                                                   |             |                                                                                                                                                                            |      |                                       |             |         |             |                  | AE                         | 82.2                          |                             | Product          |             | Mass              | MW                        | Mol                           |              |  |
|                                                                                                   |             |                                                                                                                                                                            |      |                                       |             |         |             |                  | RME                        | 66.1                          | OE                          | 80.5             | mass        |                   | 4.469                     | 475.454                       | 0.01         |  |
|                                                                                                   |             |                                                                                                                                                                            |      |                                       |             |         |             |                  | PMI total                  | 16.3                          | Unreacted limiting reactant |                  | 0.00        |                   |                           |                               |              |  |
|                                                                                                   |             |                                                                                                                                                                            |      |                                       |             |         |             |                  | PMI Reaction               | 12.2                          |                             |                  |             |                   |                           |                               |              |  |
|                                                                                                   |             |                                                                                                                                                                            |      |                                       |             |         |             |                  | reagents, catalyst         | 1.5                           |                             |                  |             |                   |                           |                               |              |  |
|                                                                                                   |             |                                                                                                                                                                            |      |                                       |             |         |             |                  | PMI reaction solvents      | 10.7                          |                             |                  |             |                   |                           |                               |              |  |
|                                                                                                   |             |                                                                                                                                                                            |      |                                       |             |         |             |                  | PMI Workup                 | 4.0                           |                             |                  |             |                   |                           |                               |              |  |
|                                                                                                   |             |                                                                                                                                                                            |      |                                       |             |         |             |                  | PMI Workup chemical        | 0.0                           |                             |                  |             |                   |                           |                               |              |  |
|                                                                                                   |             |                                                                                                                                                                            |      |                                       |             |         |             |                  | PMI workup solvents        | 4.0                           |                             |                  |             |                   |                           |                               |              |  |
| <b>Solvents (First Pass)</b>                                                                      |             |                                                                                                                                                                            |      |                                       |             |         |             |                  | <b>List solvents below</b> |                               |                             |                  |             |                   |                           |                               |              |  |
| <b>Preferred solvents</b>                                                                         |             | water, EtOH, nBuOH, AcOipr, AcOnBu, PhOMe, MeOH, tBuOH, BnOH, ethylene glycol, acetone, MEK, MIBK, AcOEt, sulfolane                                                        |      |                                       |             |         |             |                  | TBAB: Glycerol (1: 4)      |                               |                             |                  |             |                   |                           |                               |              |  |
| <b>Problematic solvents:</b> (acceptable only if substitution does not offer advantages)          |             | DMSO, cyclohexanone, DMPU, AcOH, Ac2O, Acetonitrile, AcOMe, THF, heptane, Me-cyclohexane, toluene, xylene, MTBE, cyclohexane, chlorobenzene, formic acid, pyridine, Me-THF |      |                                       |             |         |             |                  | none                       |                               |                             |                  |             |                   |                           |                               |              |  |
| <b>Hazardous solvents:</b> These solvents have significant health and/or safety concerns.         |             | dioxane, pentane, TEA, diisopropyl ether, DME, DCM, DMF, DMA, NMP, methoxyethanol, hexane                                                                                  |      |                                       |             |         |             |                  | none                       |                               |                             |                  |             |                   |                           |                               |              |  |
| <b>Highly hazardous solvents:</b> The solvents which are agreed not to be used, even in screening |             | Et <sub>2</sub> O, Benzene, CCl <sub>4</sub> , chloroform, DCE, nitromethane, CS <sub>2</sub> , HMPA                                                                       |      |                                       |             |         |             |                  | none                       |                               |                             |                  |             |                   |                           |                               |              |  |



## References

- S1. R. Ghosh, R. R. Behera, S. Panda, S. K. Behera, N. C. Jana and B. Bagh, *ChemCatChem*, 2022, e202201062.
- S2. A. Kushwaha, A. K. Agrihari, K. Manar, C. Yadav, V. K. Tiwari, M. G. B. Drew and N. Singh, *New J. Chem.*, 2019, **43**, 8939–8949.
- S3. S. Lal and S. Díez-González, *J. Org. Chem.*, 2011, **76**, 2367–2373.
- S4. Oxford Diffraction (2010). *CrysAlisPro* (Version 1.171.34.44). Oxford Diffraction Ltd., Yarnton, Oxfordshire, UK.
- S5. O. V. Dolomanov, L. J. Bourhis, R. J. Gildea. Howard, J. A. K.; Puschmann, H. OLEX2: a complete structure solution, refinement and analysis program. *J. Appl. Crystallogr.*, 2009, **42**, 339–341.
- S6. G. M. Sheldrick, *Acta Cryst.*, 2015, **A71**, 3–8.
- S7. G. M. Sheldrick, *Acta Cryst.*, 2015, **C71**, 3–8.
